# Supplementary material for: An airborne regional carbon balance for Central Amazonia
Source: Copernicus journal article supplement (doi:10.5194/bg-4-759-2007), 2007-09-14

## TRAJECTORY ANALYSIS

The following diagrams show the 12 hour and 7 day back trajectories for the 11 flights analysed. Diagram names reflect the UST at time of air mass arrival and the flights to which they refer can be determined from Table 1 below. The following colour coding is used: red – 250 m arrival height; yellow – 750 m arrival height; green – 1500 m arrival height; magenta – 3000 m arrival height. Trajectories are shown not only for the RAMS model grid cell closest to the point of measurement, but also for air masses arriving at adjacent grid cells.

**Table 1.**

Details for all 14 flight undertaken, showing the local times of the measurement spirals (UST – 4hrs) as well as trajectory codes (supplementary information), and the day or night time integral period(s) to which the flights relate.

| Flight No           | Start Spiral     | End Spiral       | Trajectory | Day "Period" | "Night Period" |
|---------------------|------------------|------------------|------------|--------------|----------------|
| <i>Claire-II-3</i>  | 07/07/2001 10:08 | 07/07/2001 10:28 |            |              |                |
| <i>Claire-II-4</i>  | 07/07/2001 16:06 | 07/07/2001 16:23 | 07072030   |              |                |
| <i>Claire-II-5</i>  | 08/07/2001 09:27 | 08/07/2001 09:45 | 07081330   |              |                |
| <i>Claire-II-6</i>  | 10/07/2001 15:43 | 10/07/2001 16:19 | Not made   |              |                |
| <i>Claire-II-7</i>  | 11/07/2001 09:34 | 11/07/2001 09:51 | Not made   |              |                |
| <i>Claire-II-8</i>  | 11/07/2001 15:37 | 11/07/2001 15:54 | Figure 1   |              |                |
| <i>Claire-II-9</i>  | 12/07/2001 09:23 | 12/07/2001 09:42 | Figure 1   |              |                |
| <i>Claire-II-13</i> | 16/07/2001 15:58 | 16/07/2001 16:13 | 07162000   |              |                |
| <i>Claire-II-14</i> | 17/07/2001 09:43 | 17/07/2001 10:02 | 07171400   |              |                |
| <i>Claire-II-15</i> | 17/07/2001 15:18 | 17/07/2001 15:42 | 07172000   |              |                |
| <i>Claire-II-16</i> | 18/07/2001 09:26 | 18/07/2001 09:43 | 07181400   |              |                |
| <i>Claire-II-17</i> | 18/07/2001 16:12 | 18/07/2001 16:32 | 07182000   |              |                |
| <i>Claire-II-20</i> | 20/07/2001 11:17 | 20/07/2001 11:36 | 07201400   |              |                |
| <i>Claire-II-21</i> | 20/07/2001 14:43 | 20/07/2001 15:02 | 07202000   |              |                |

07072030

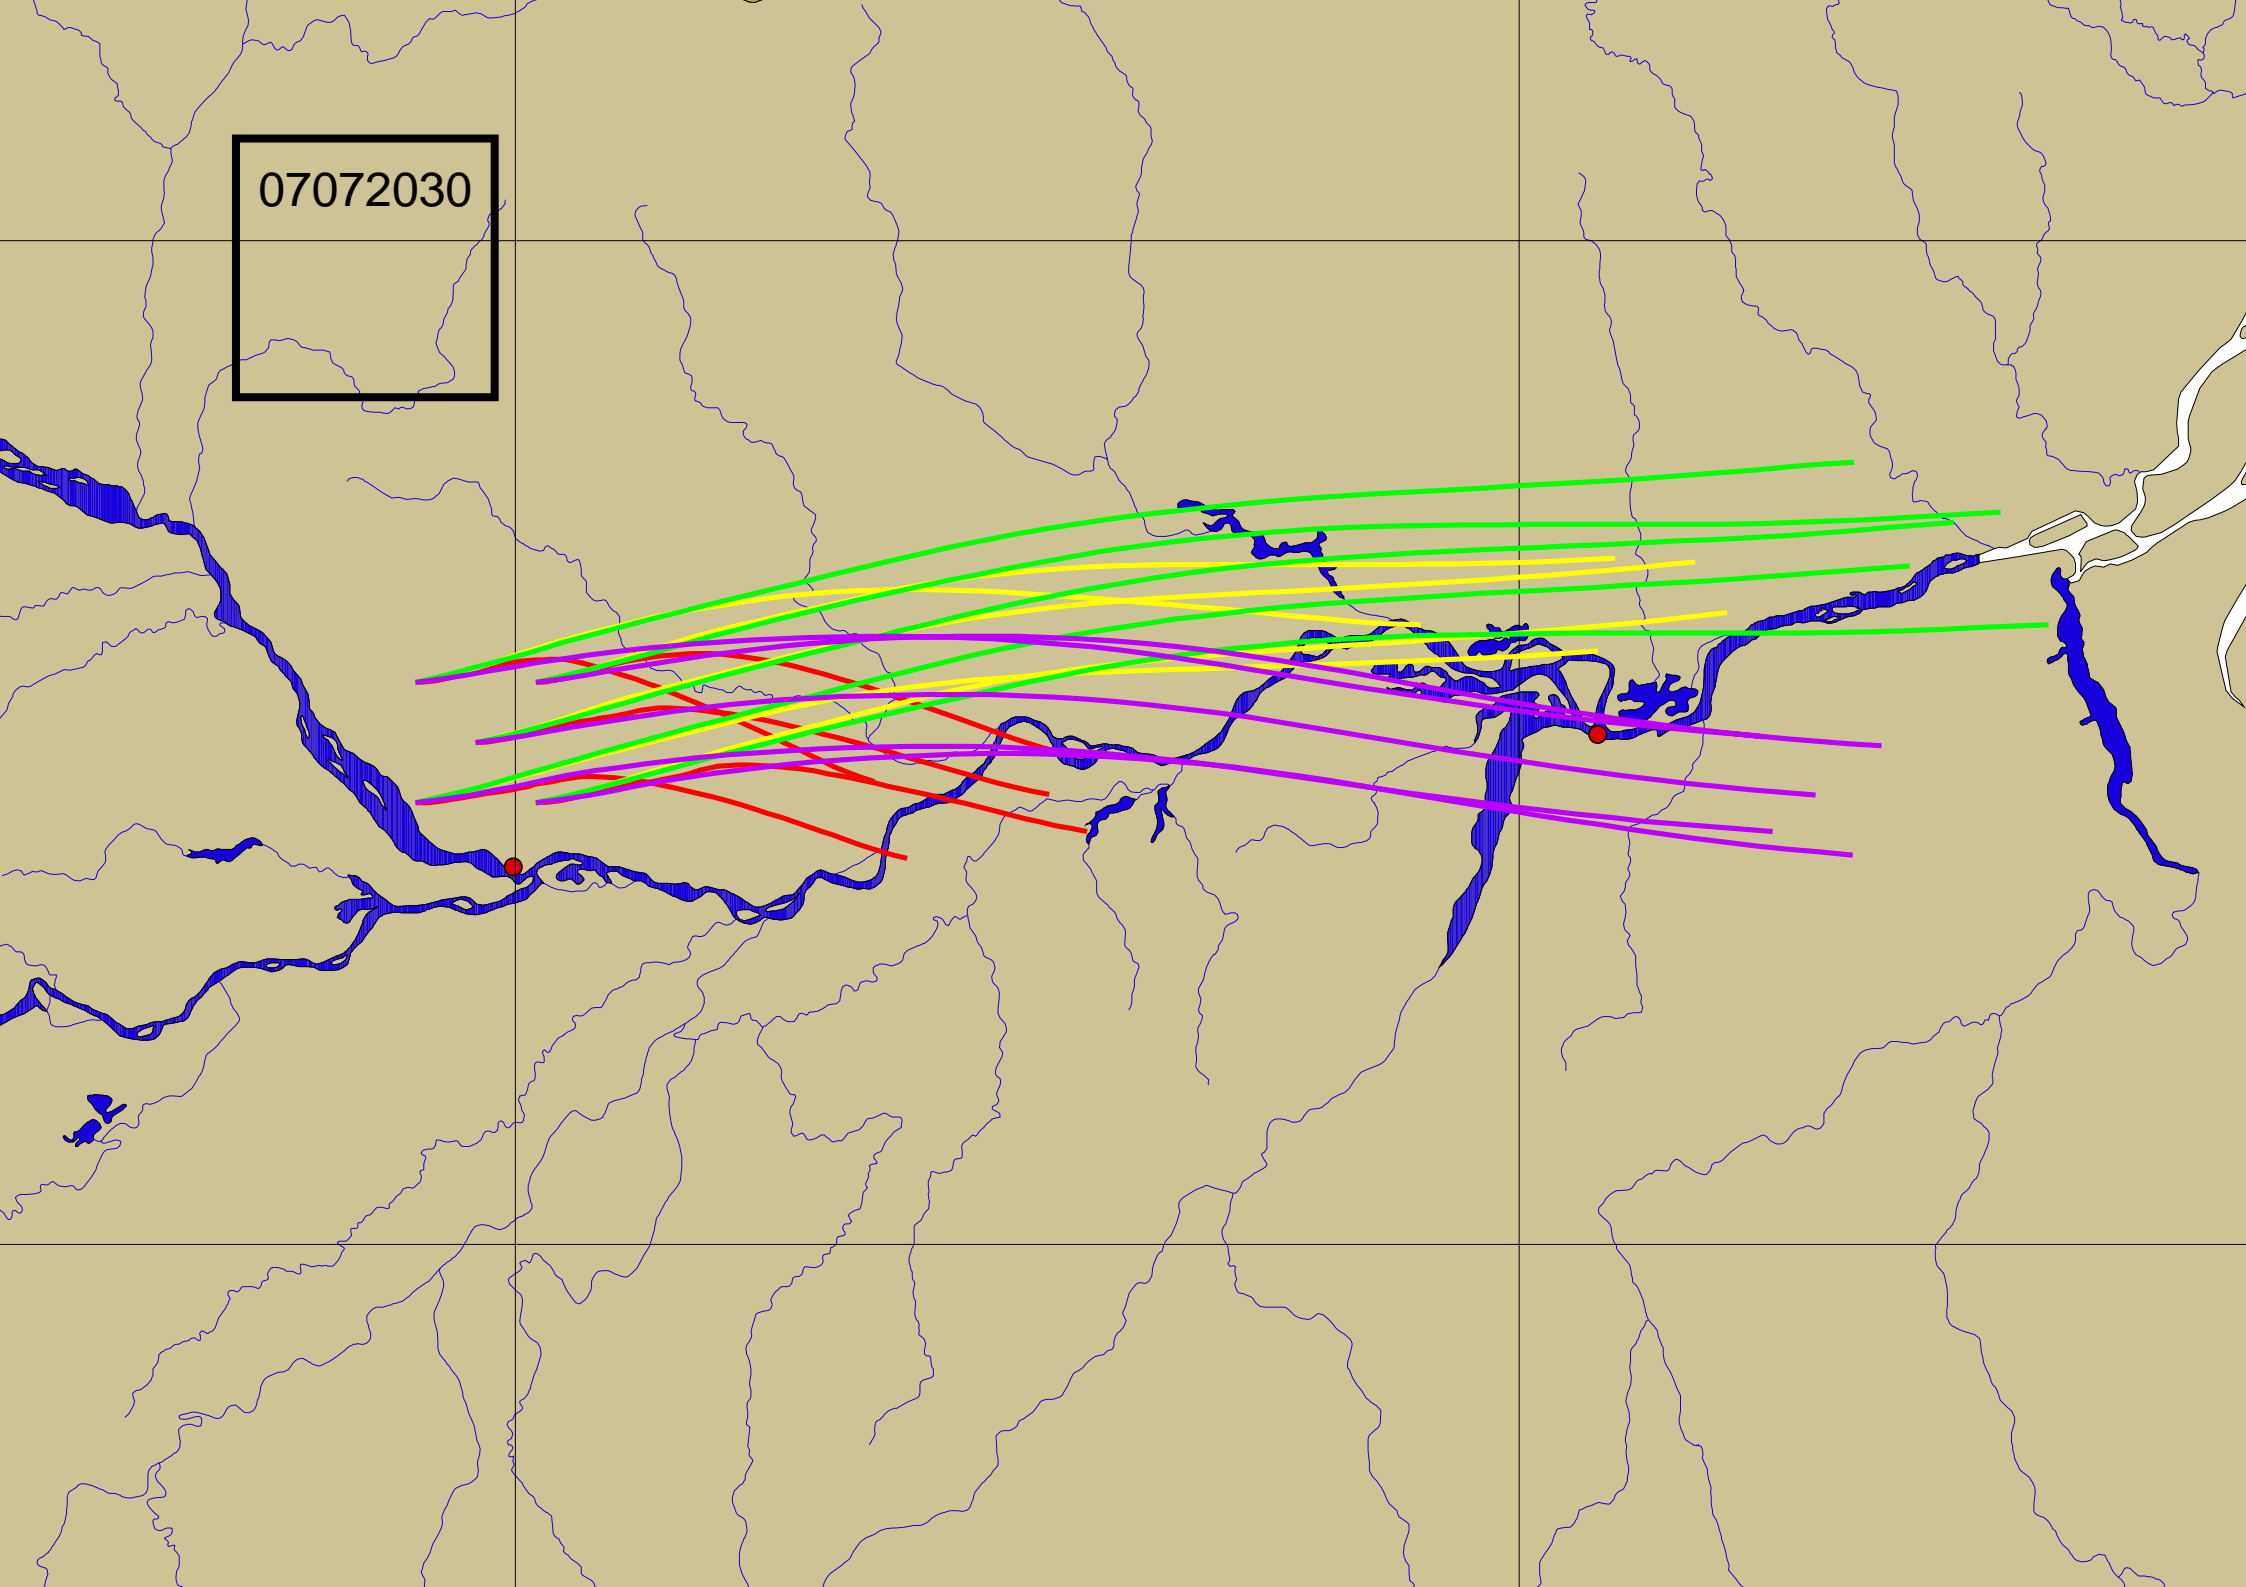

07072030

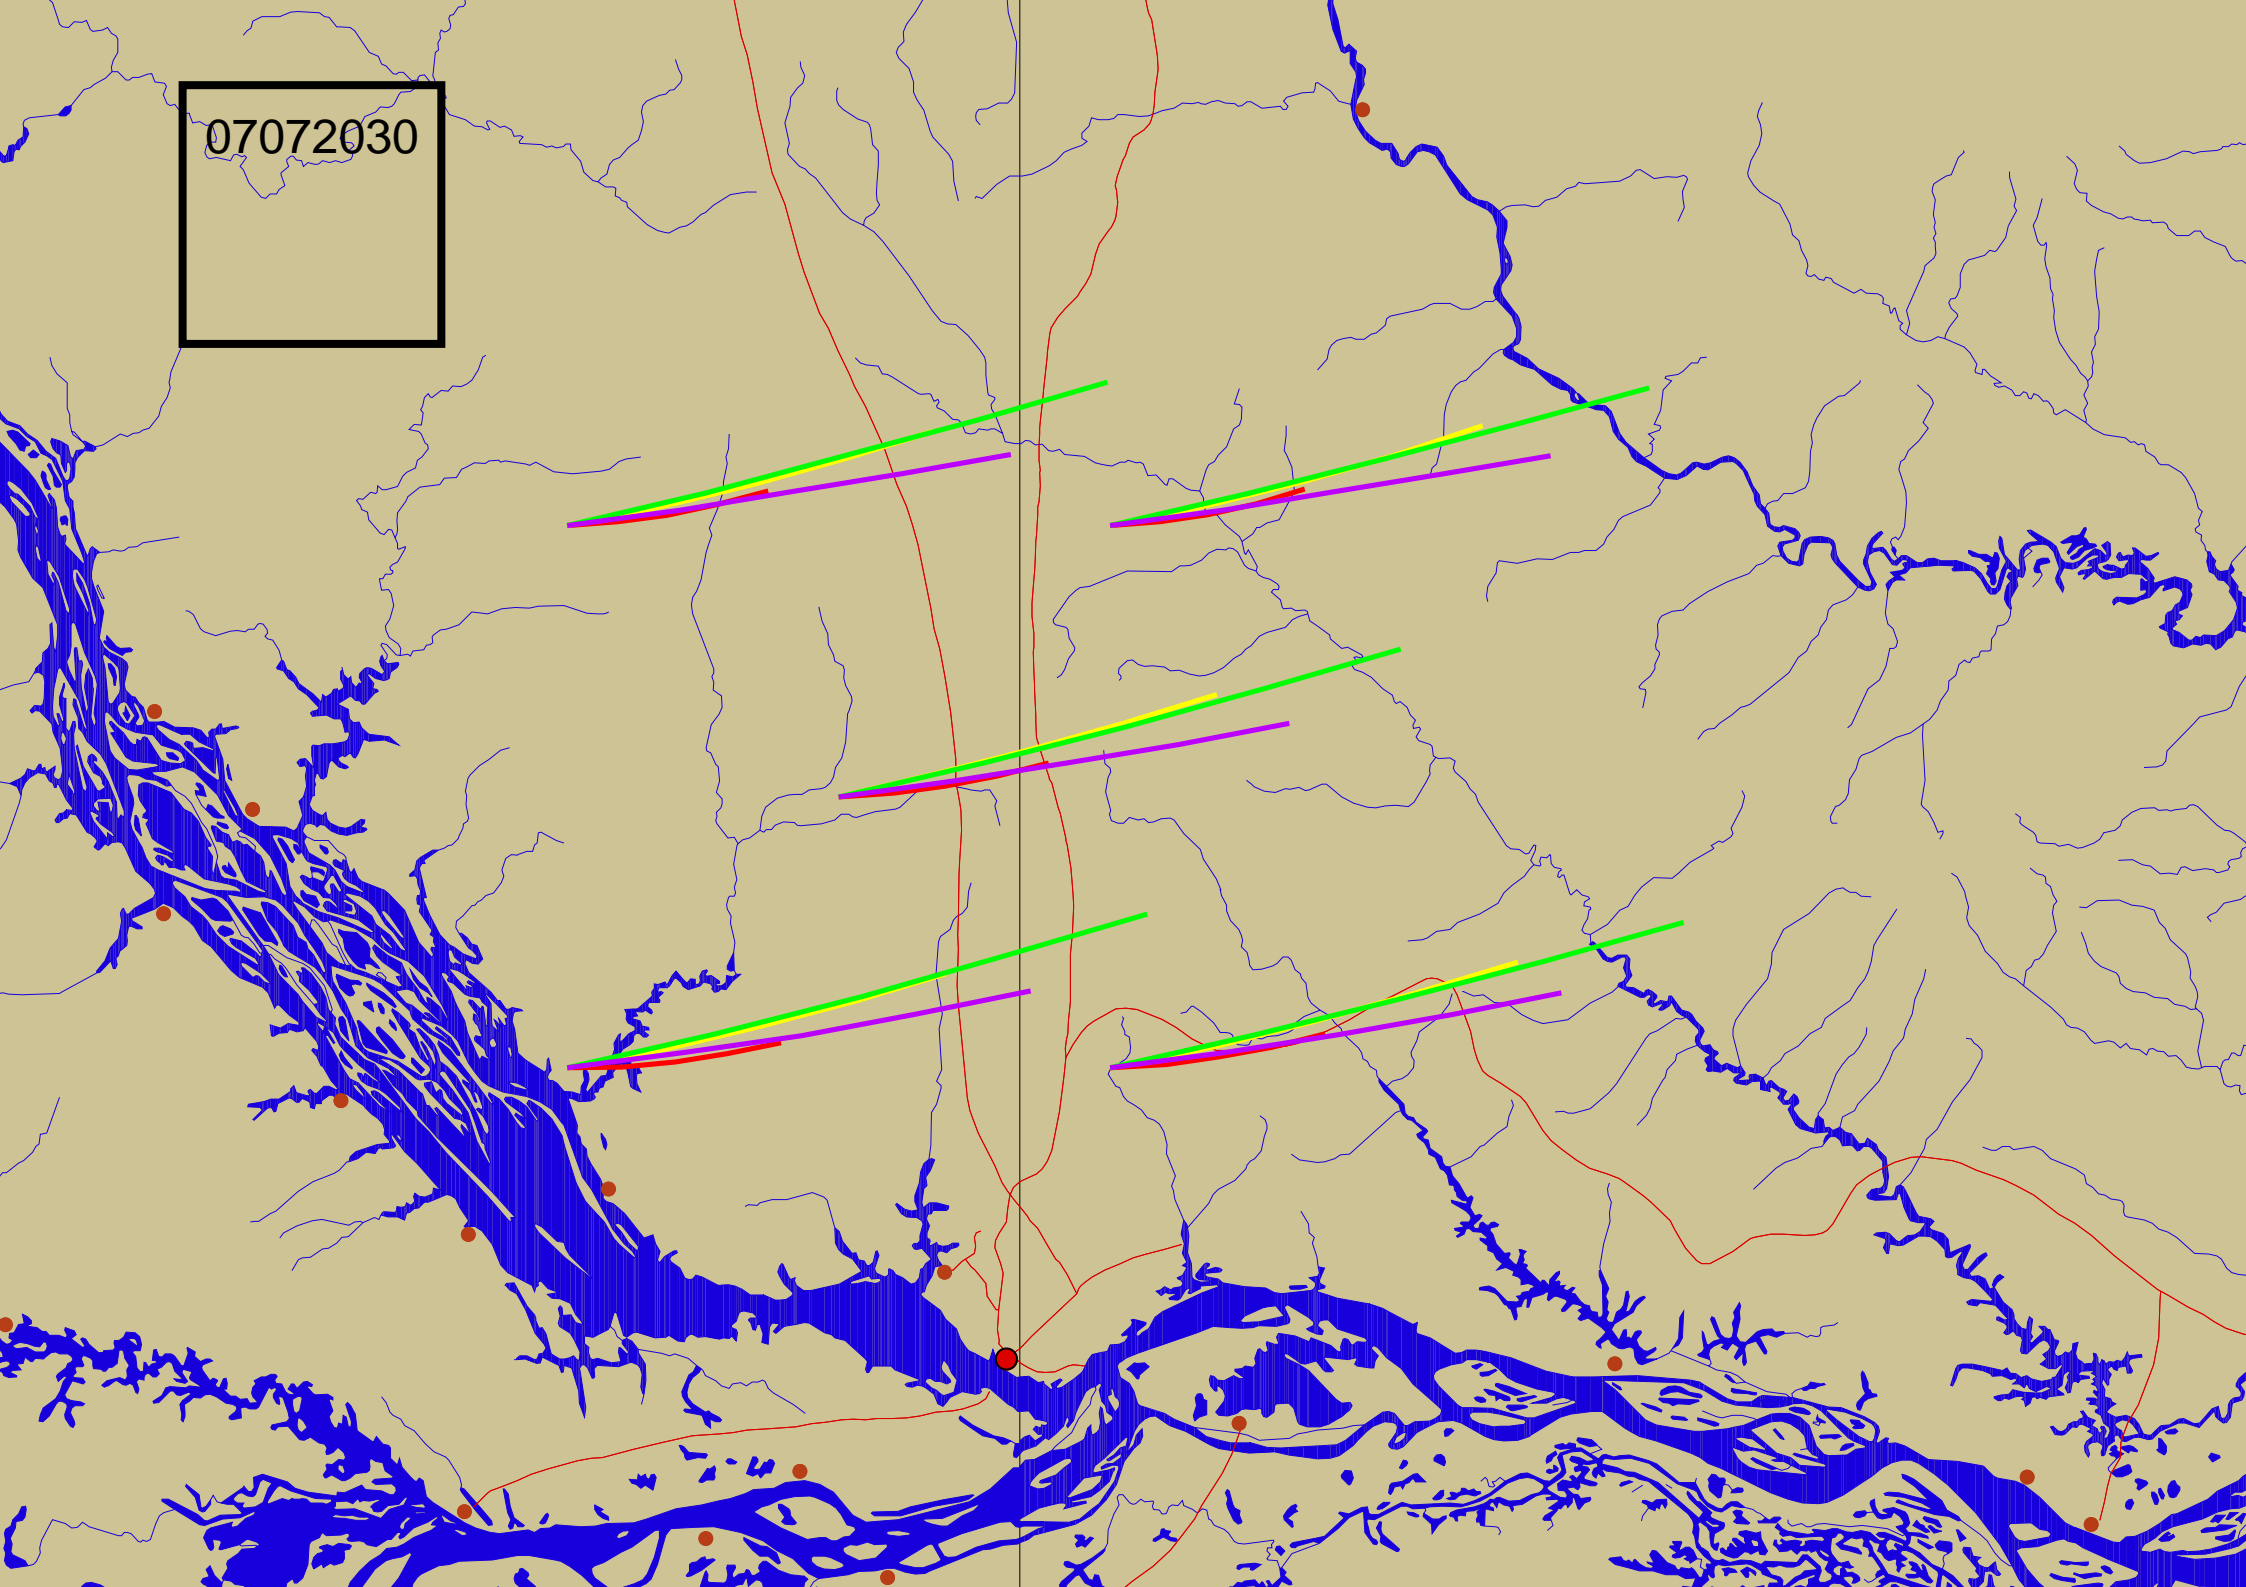

07081330

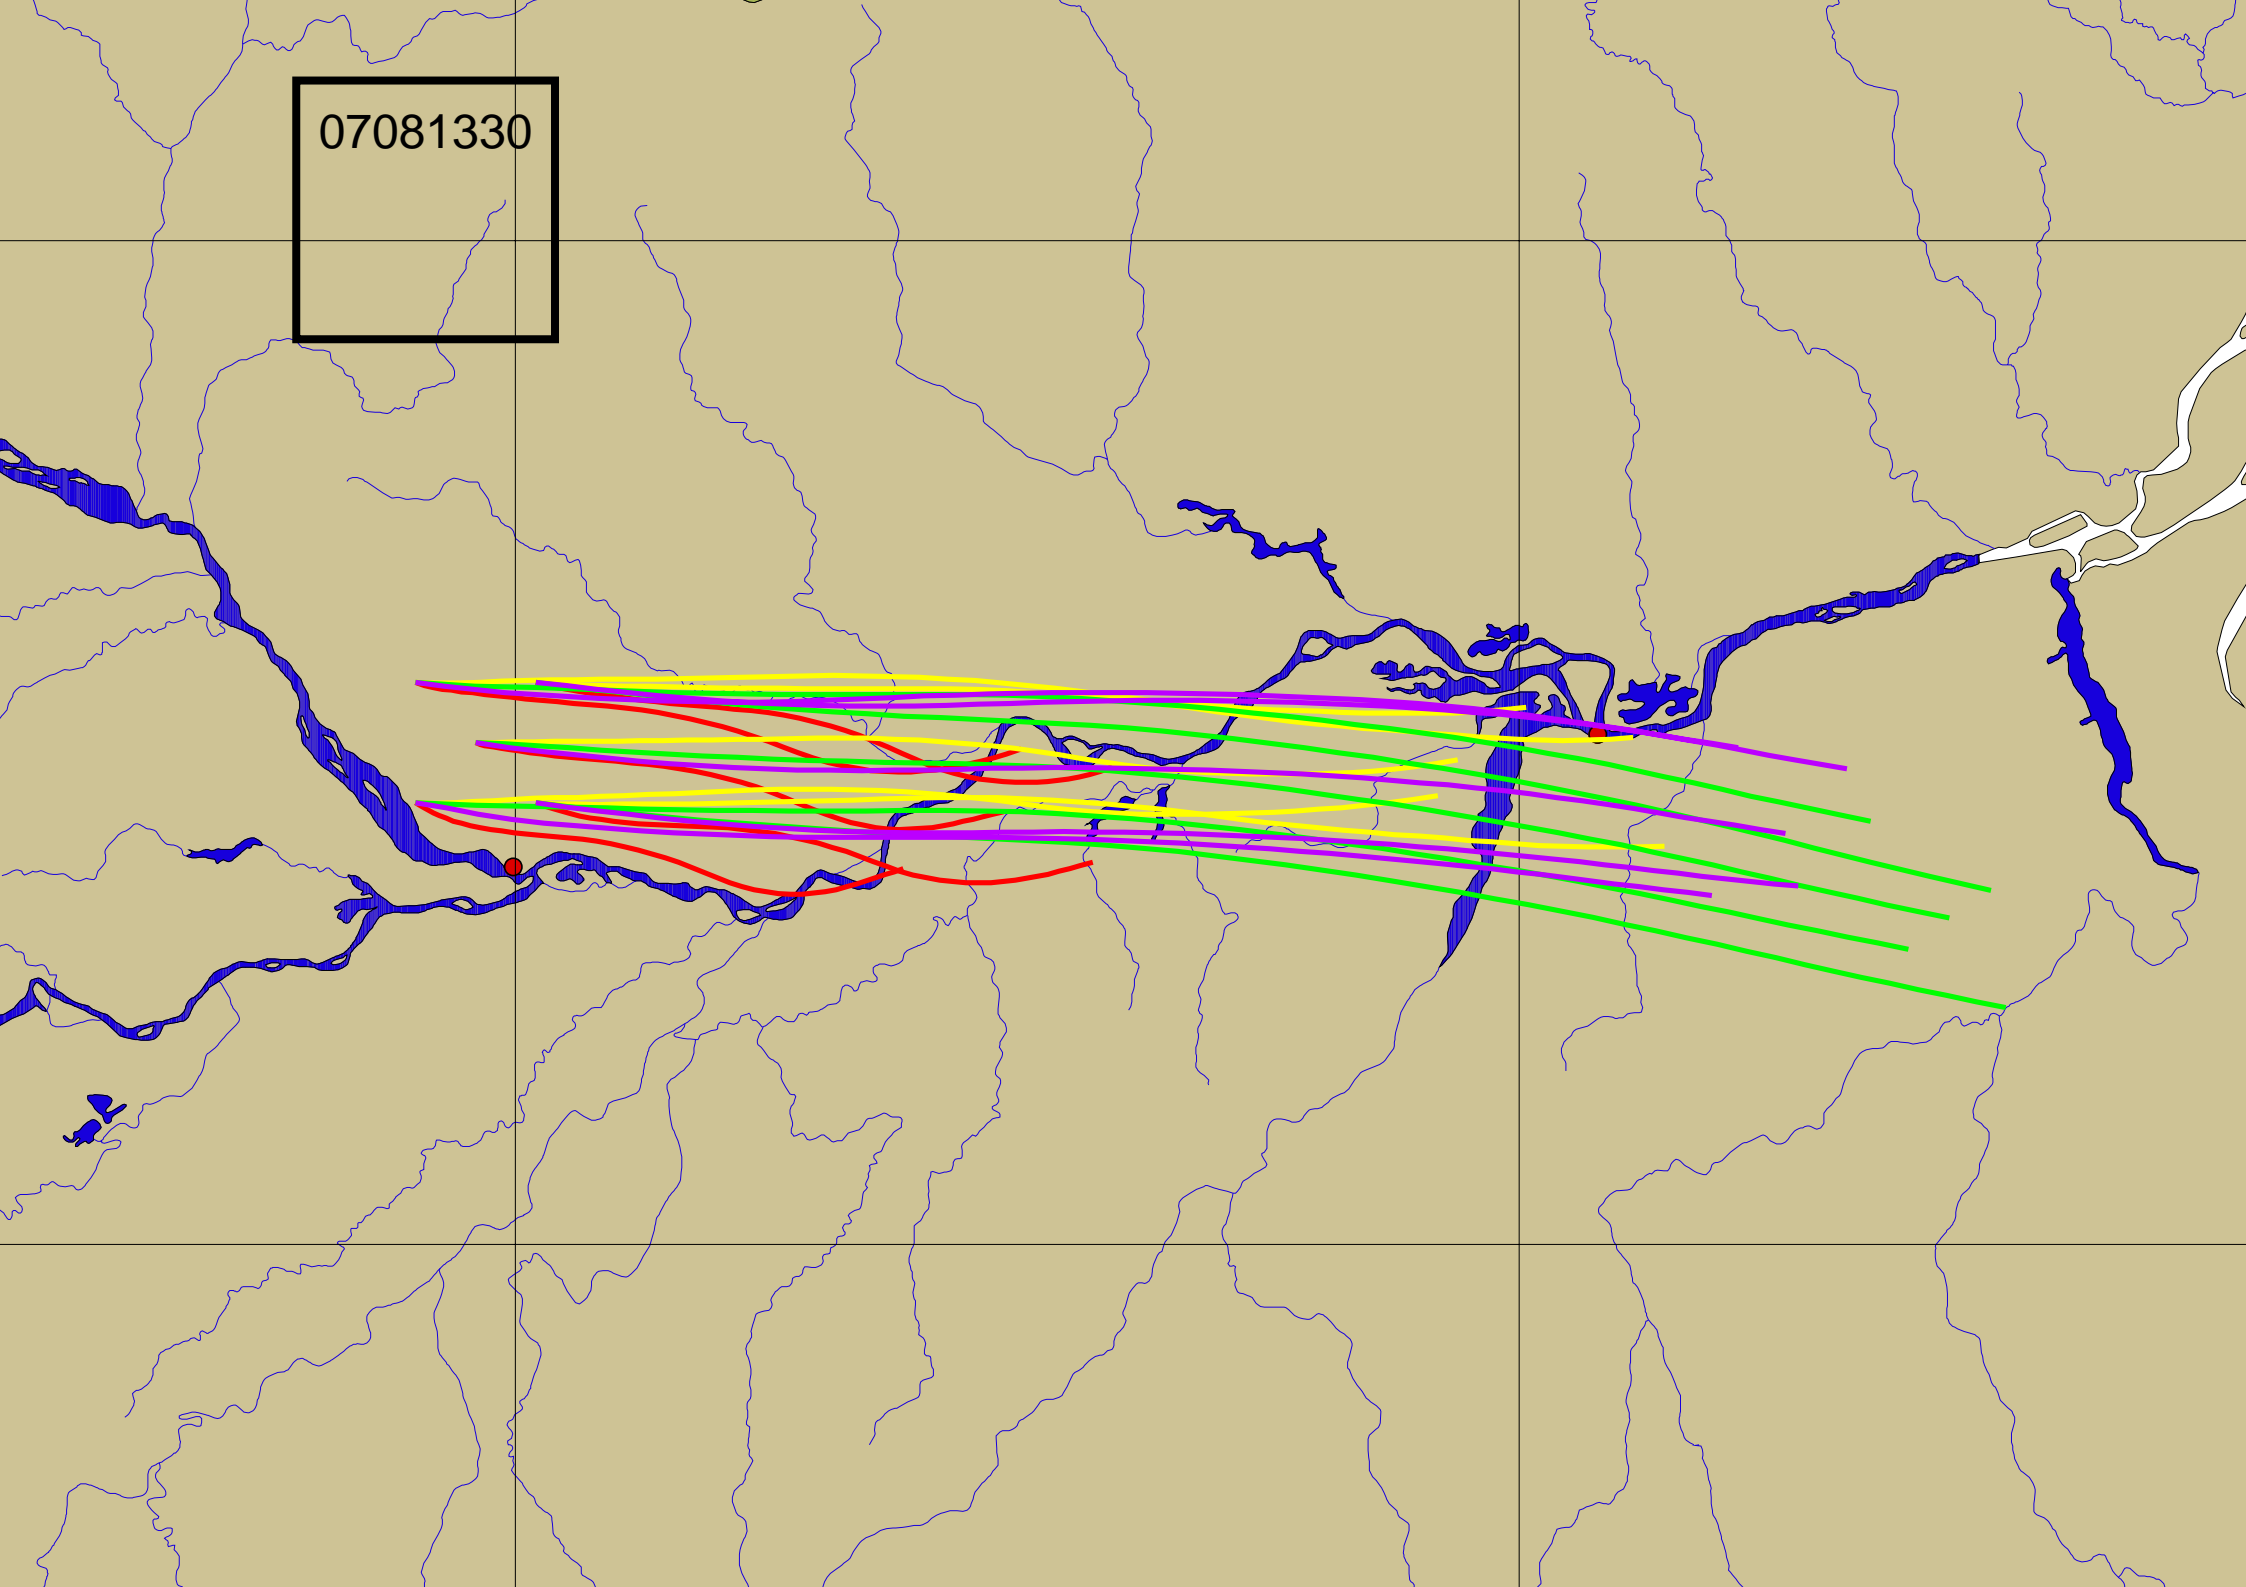

07081330

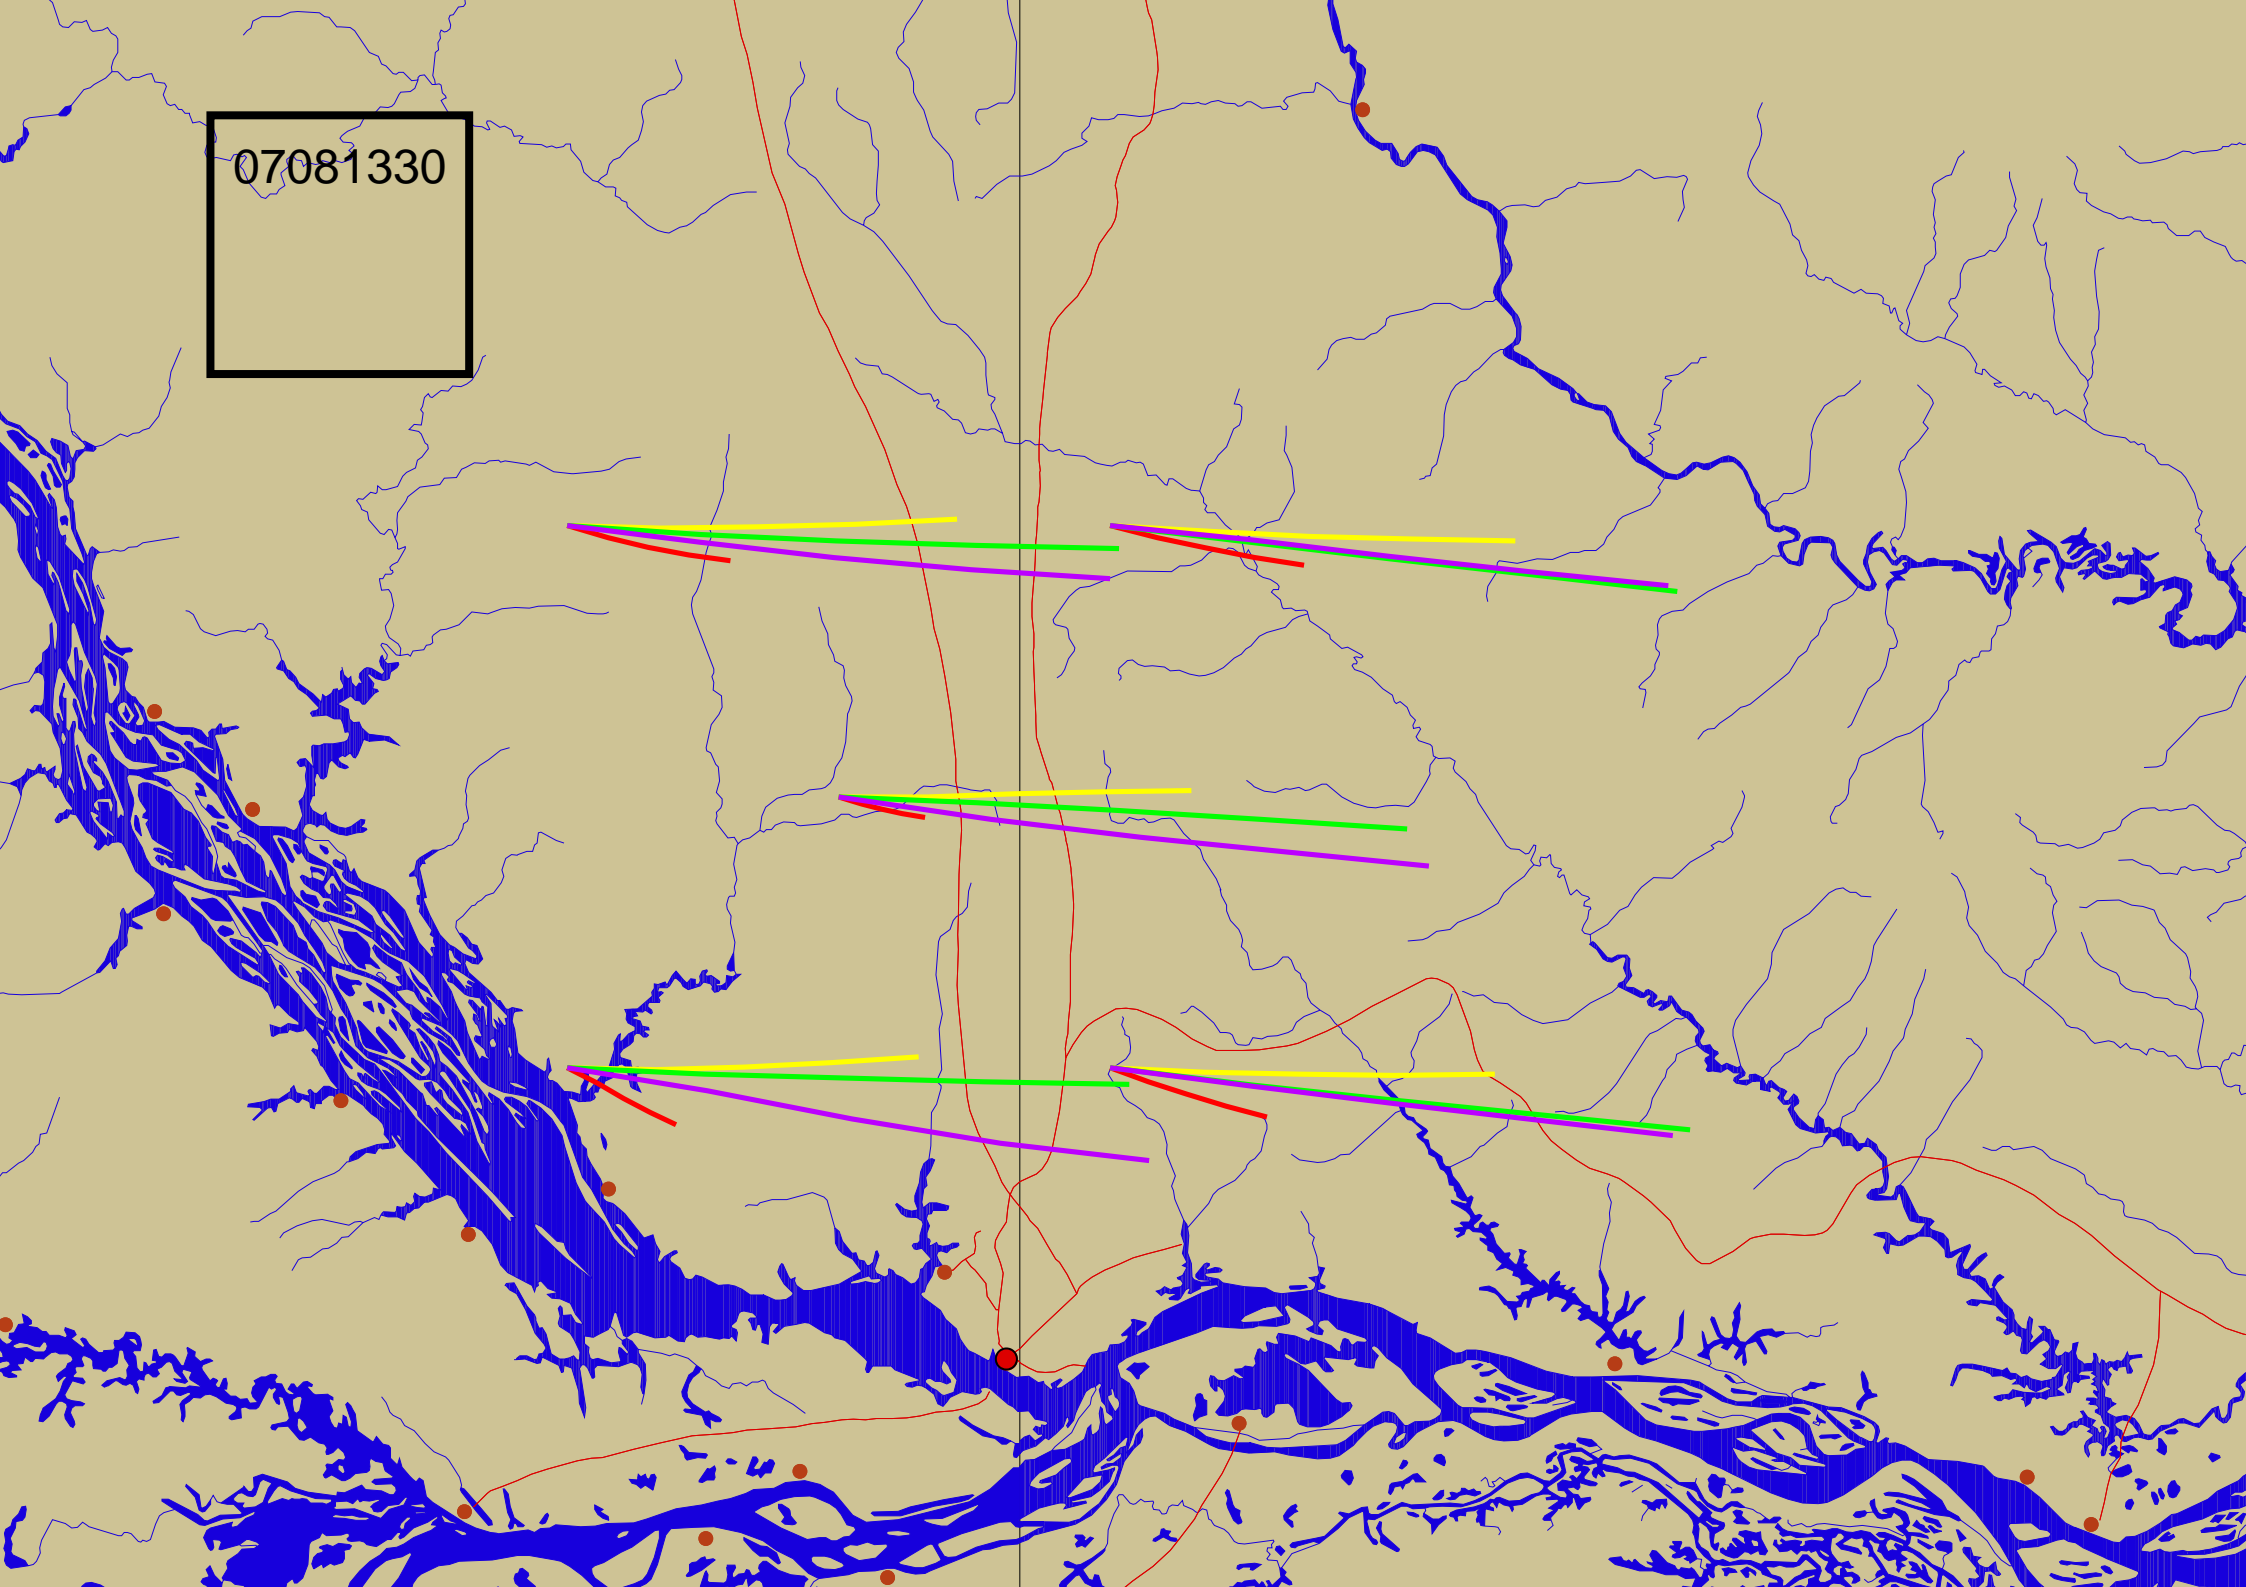

07122000

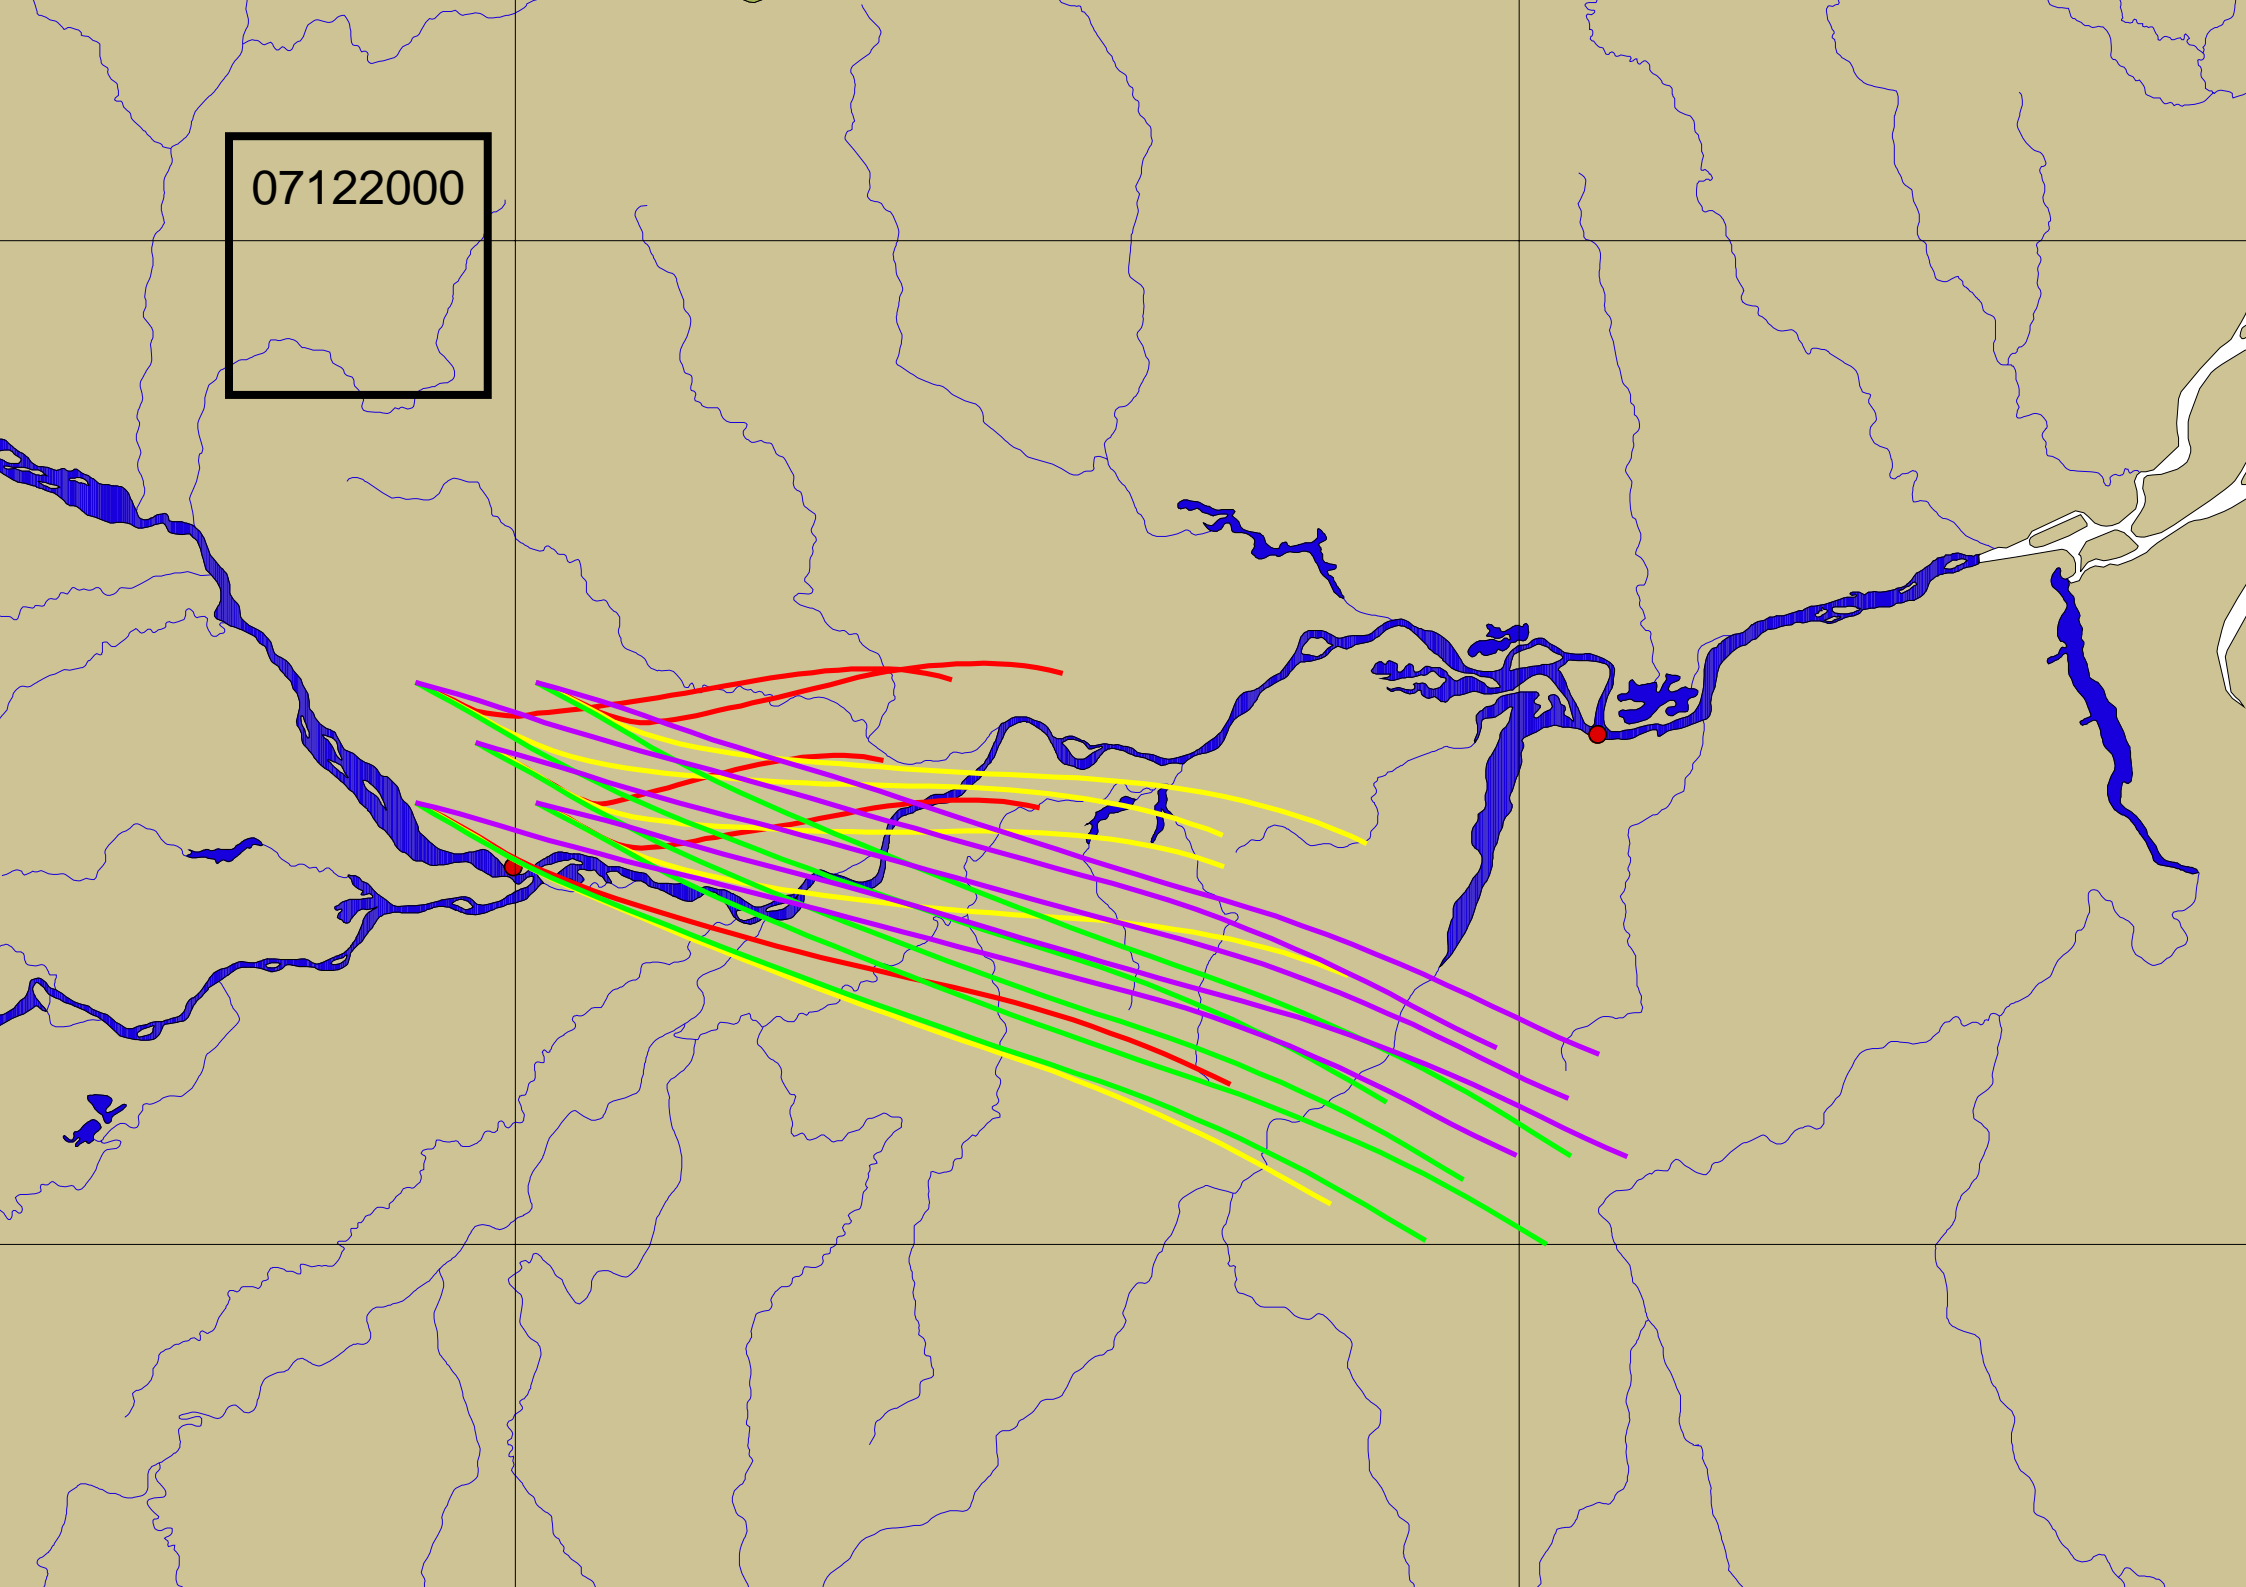

07122000

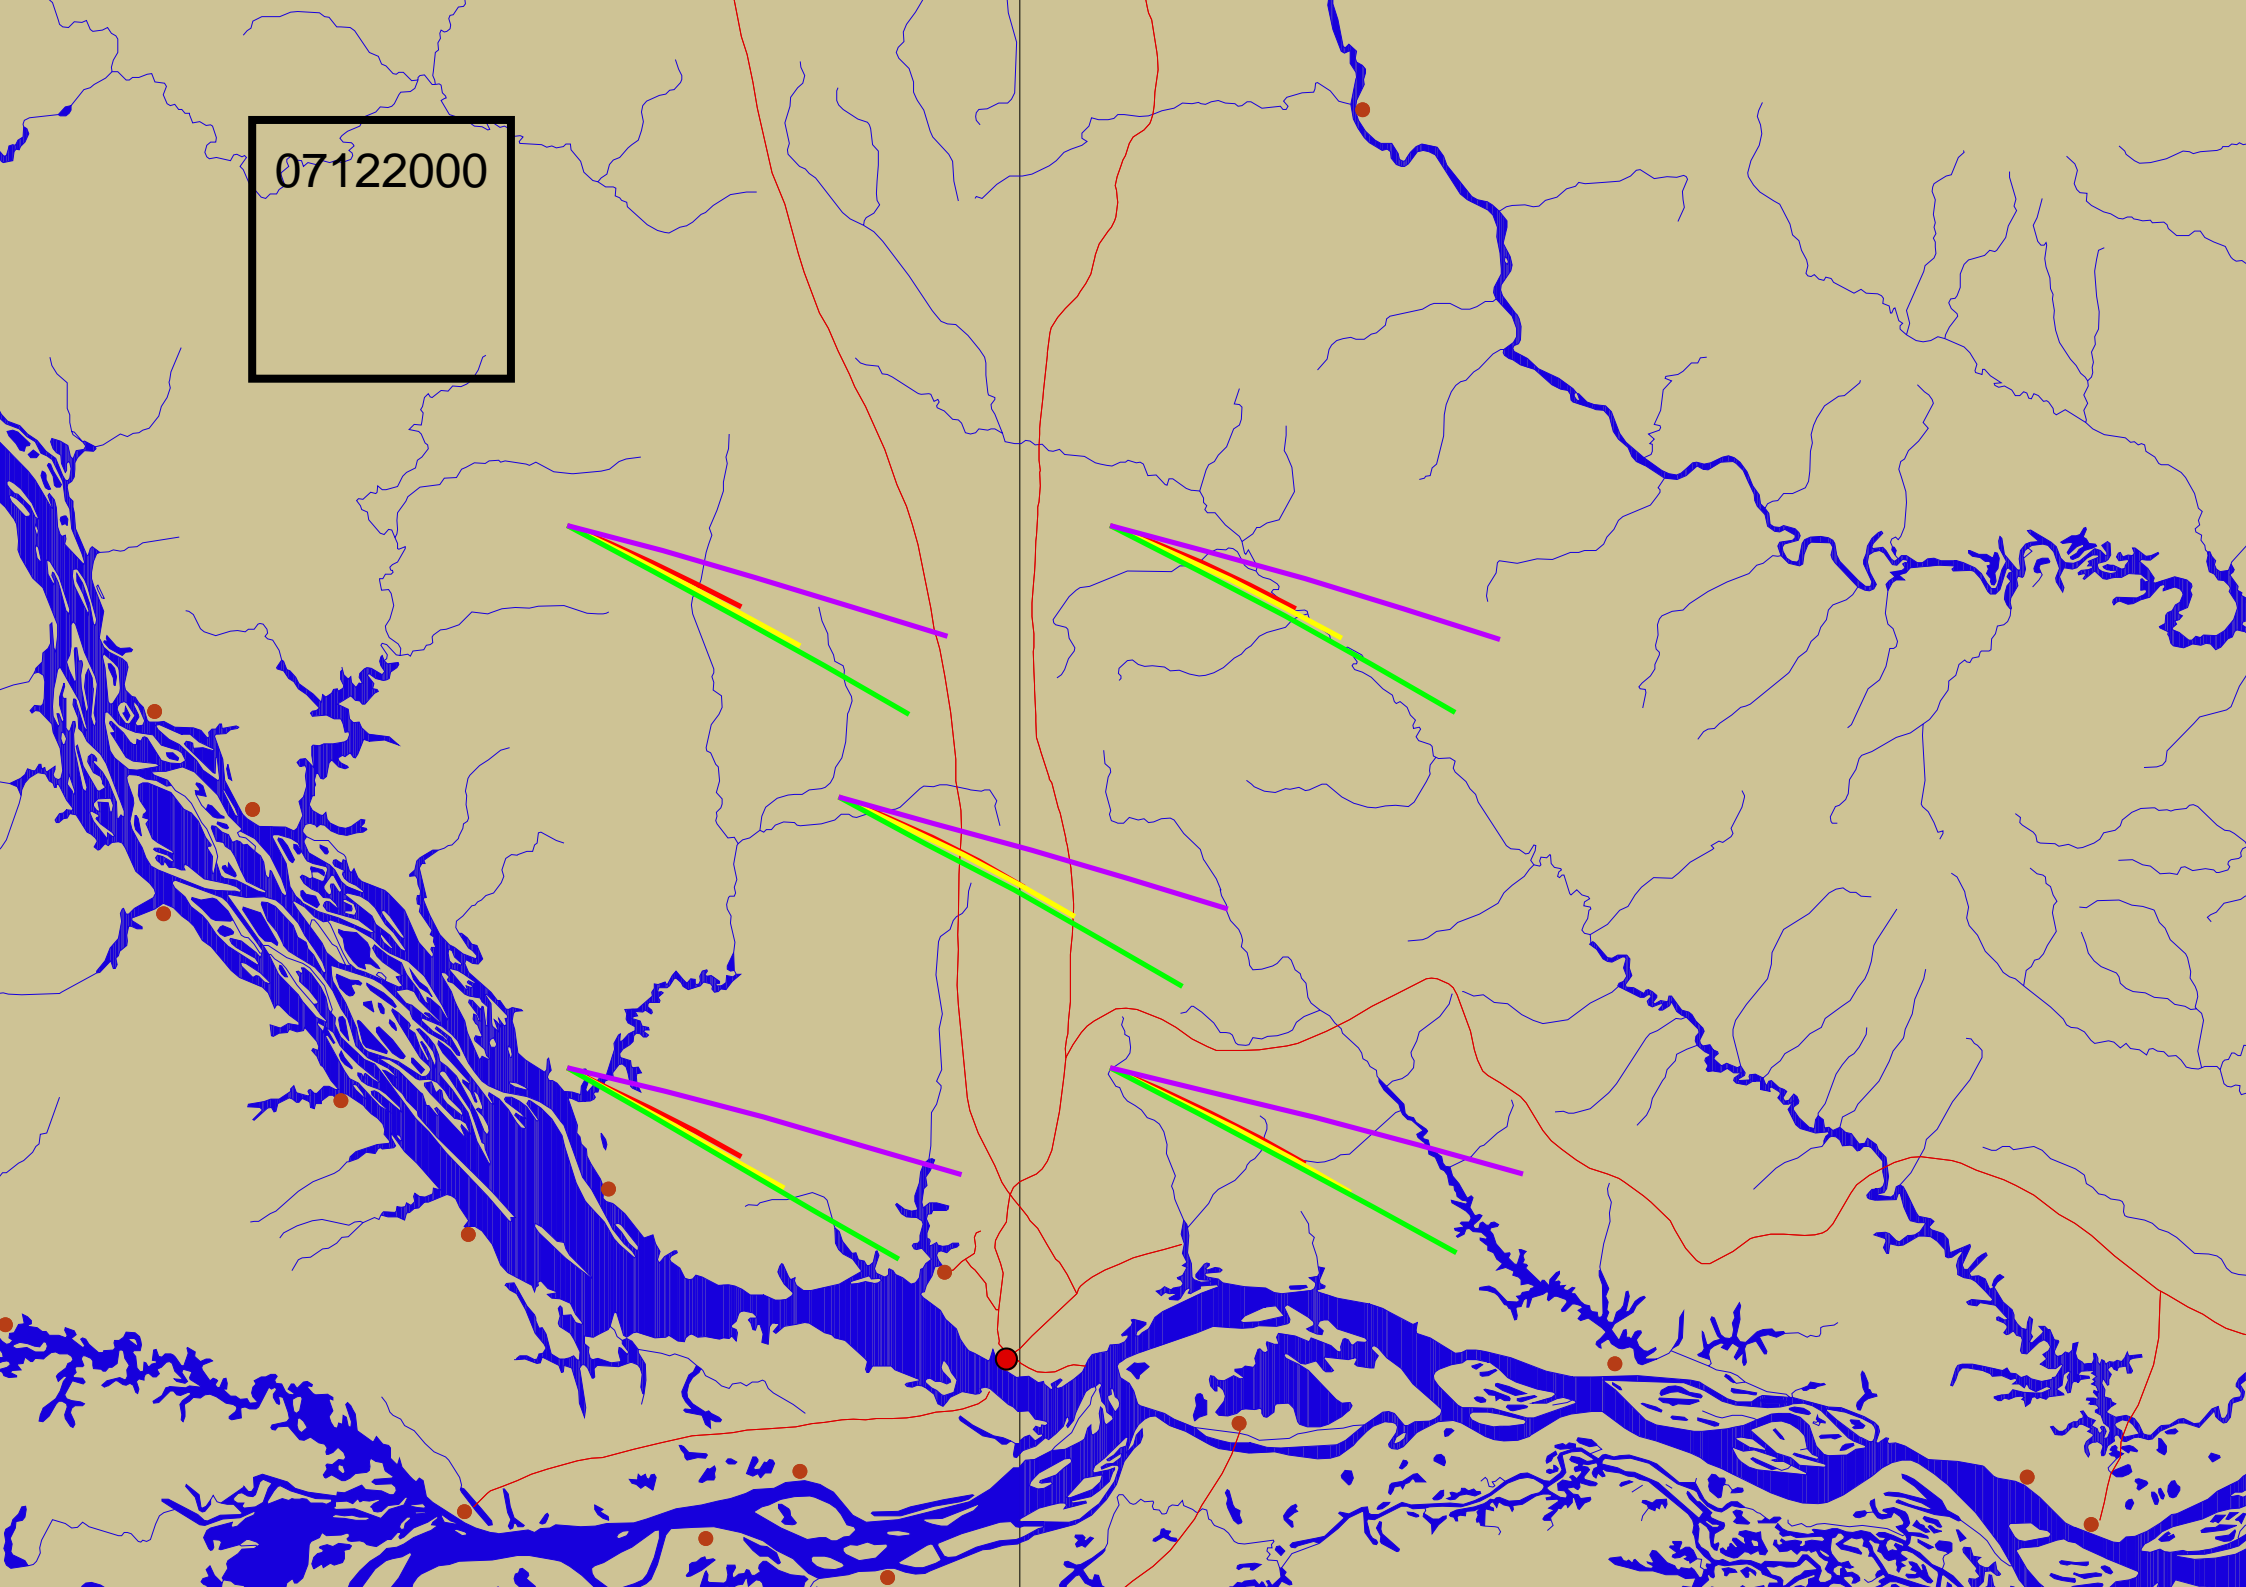

07121400

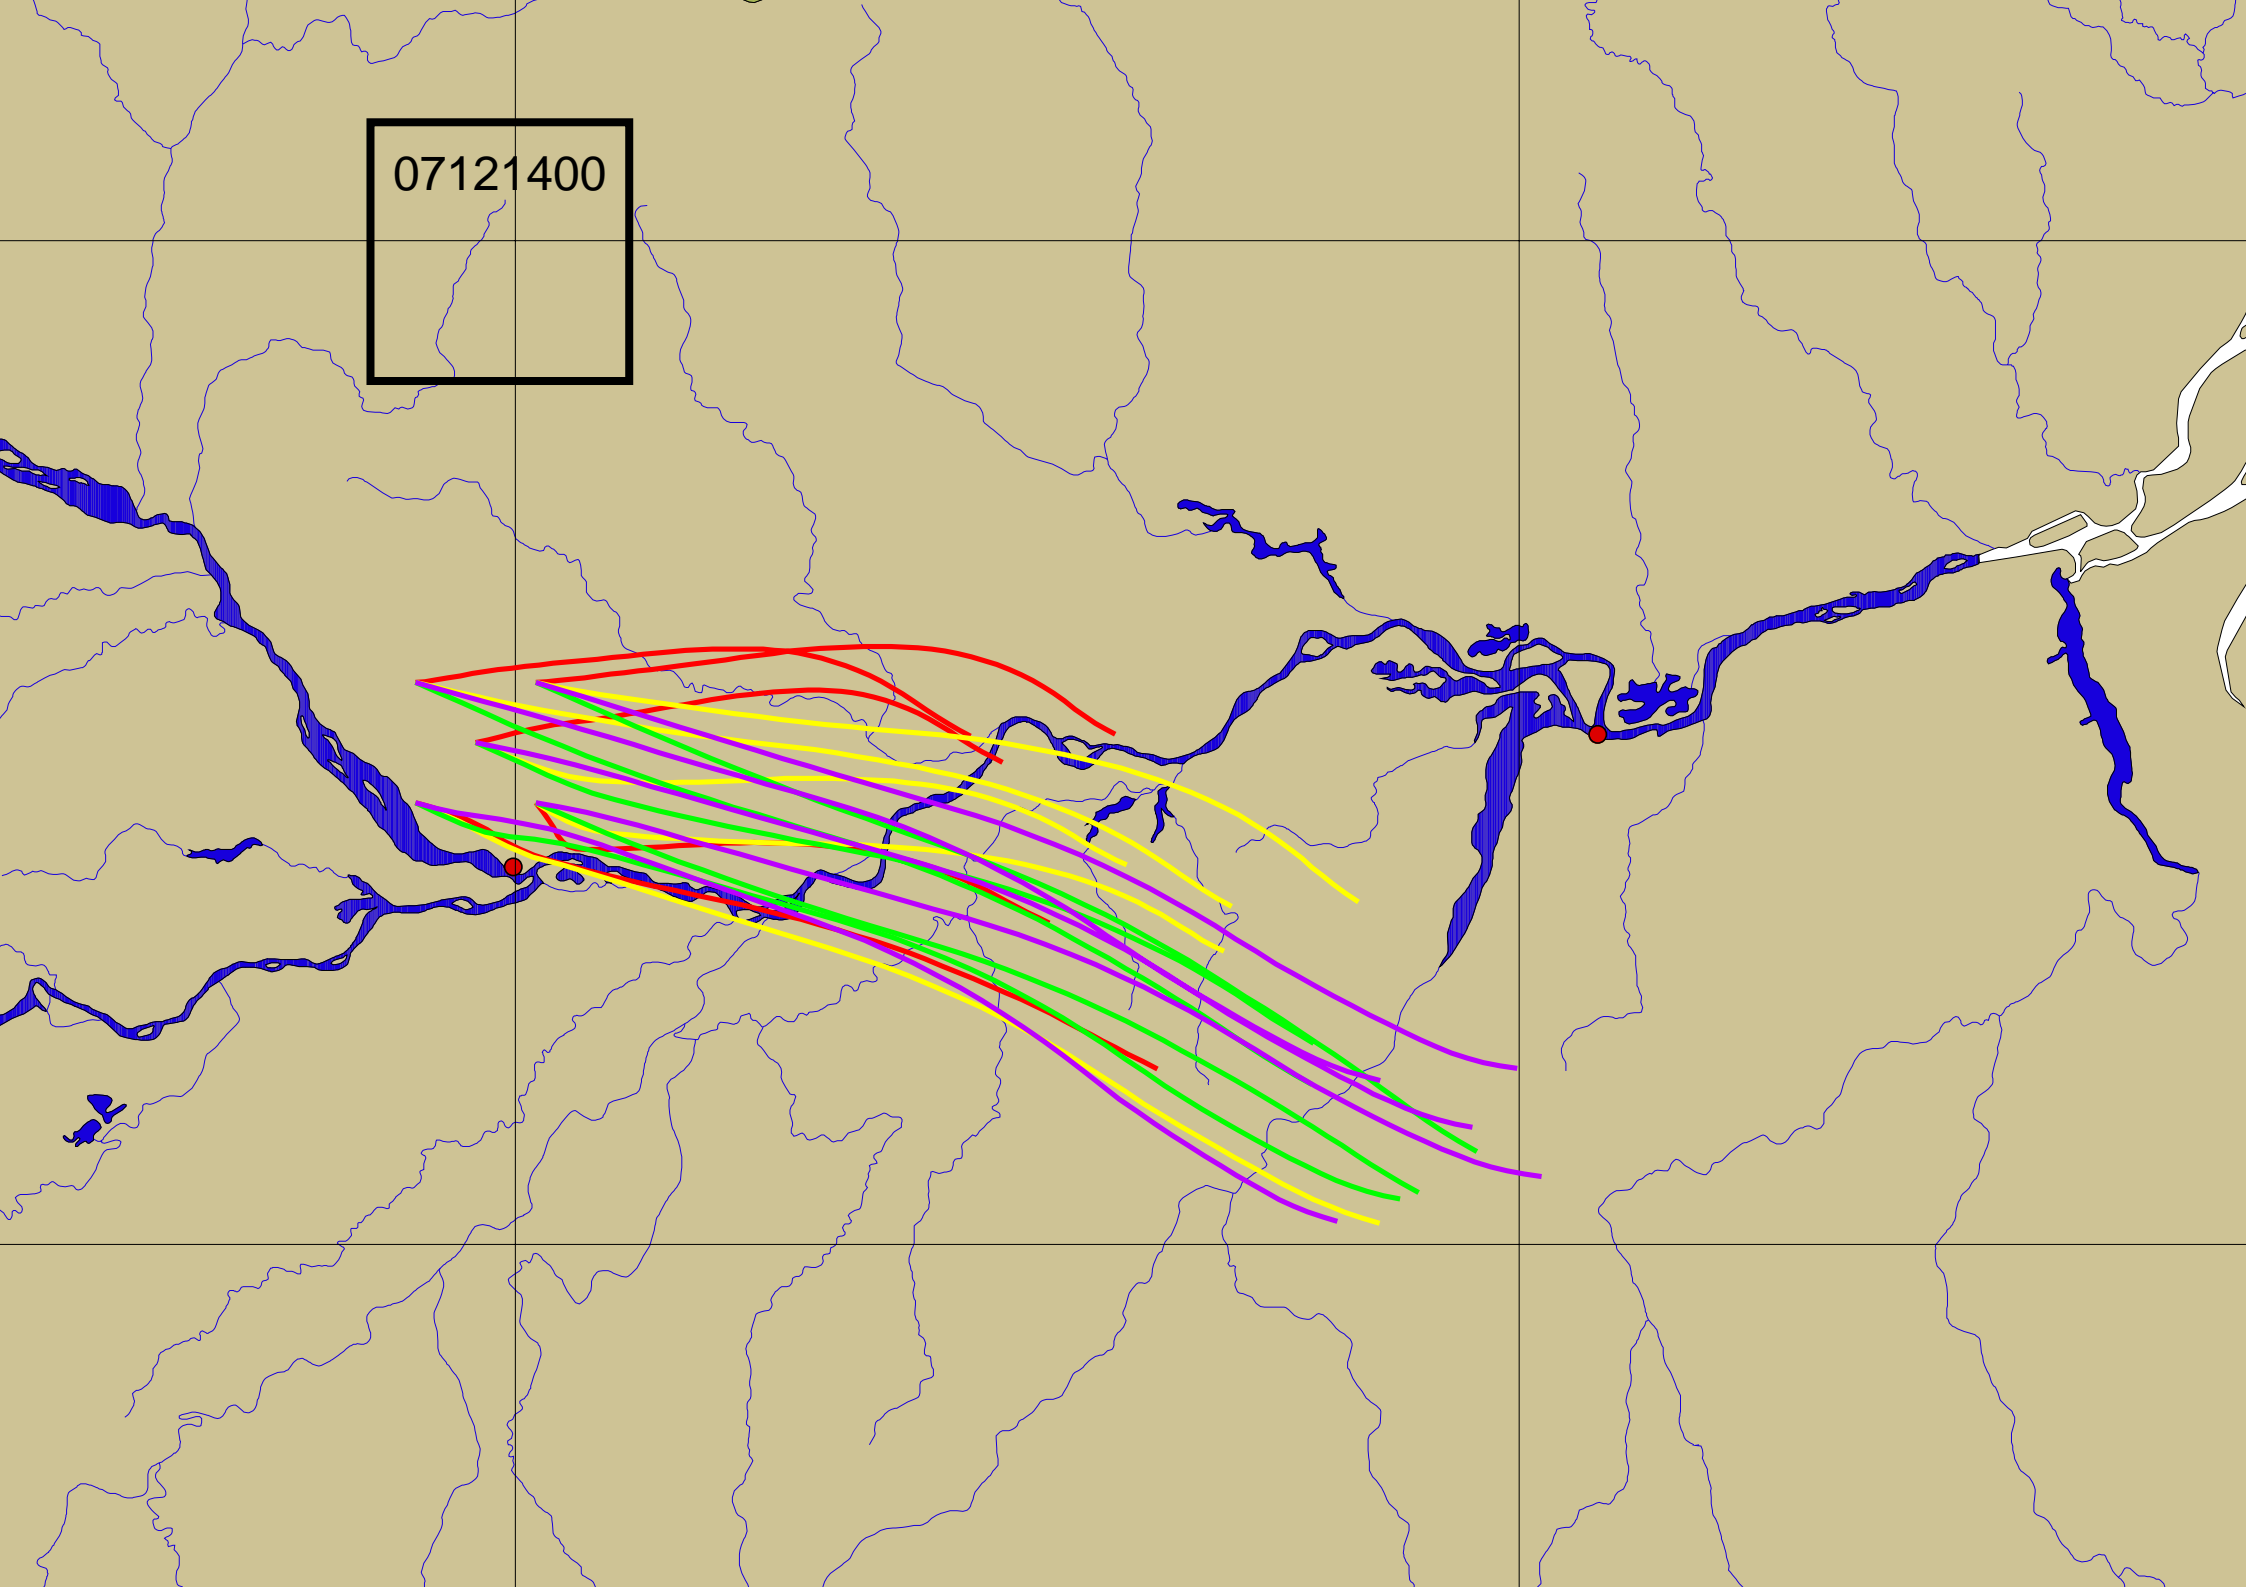



07121400

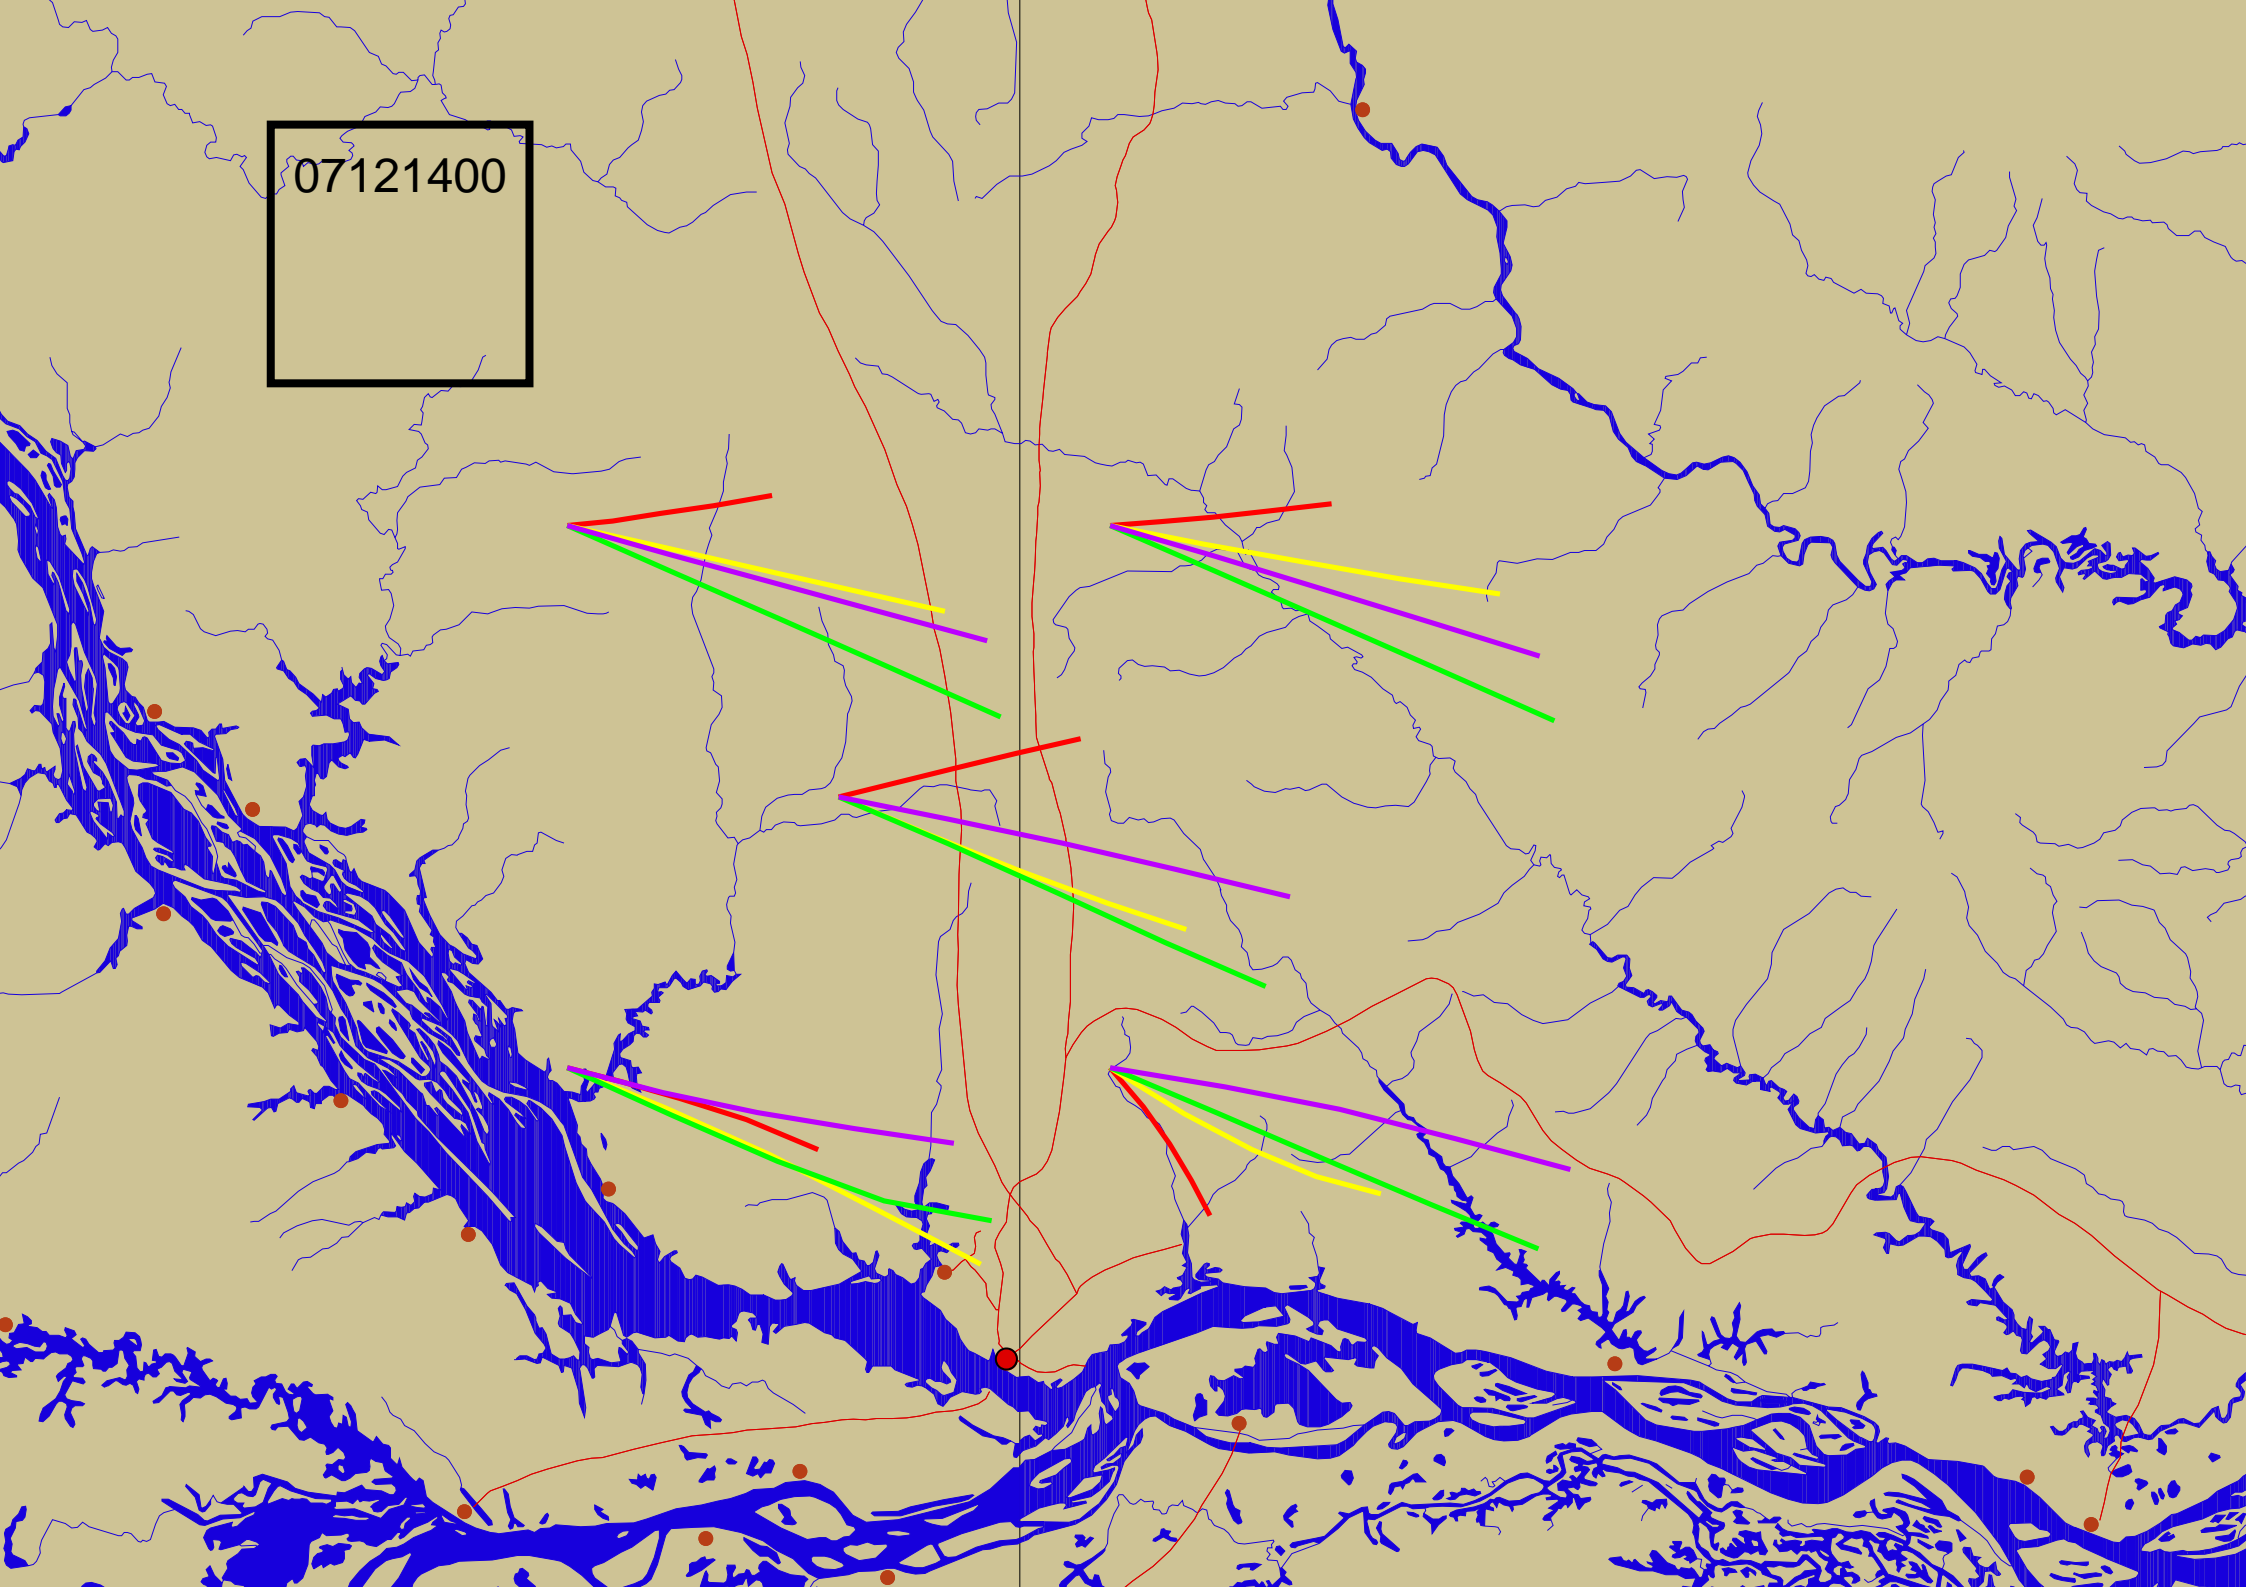

07162000

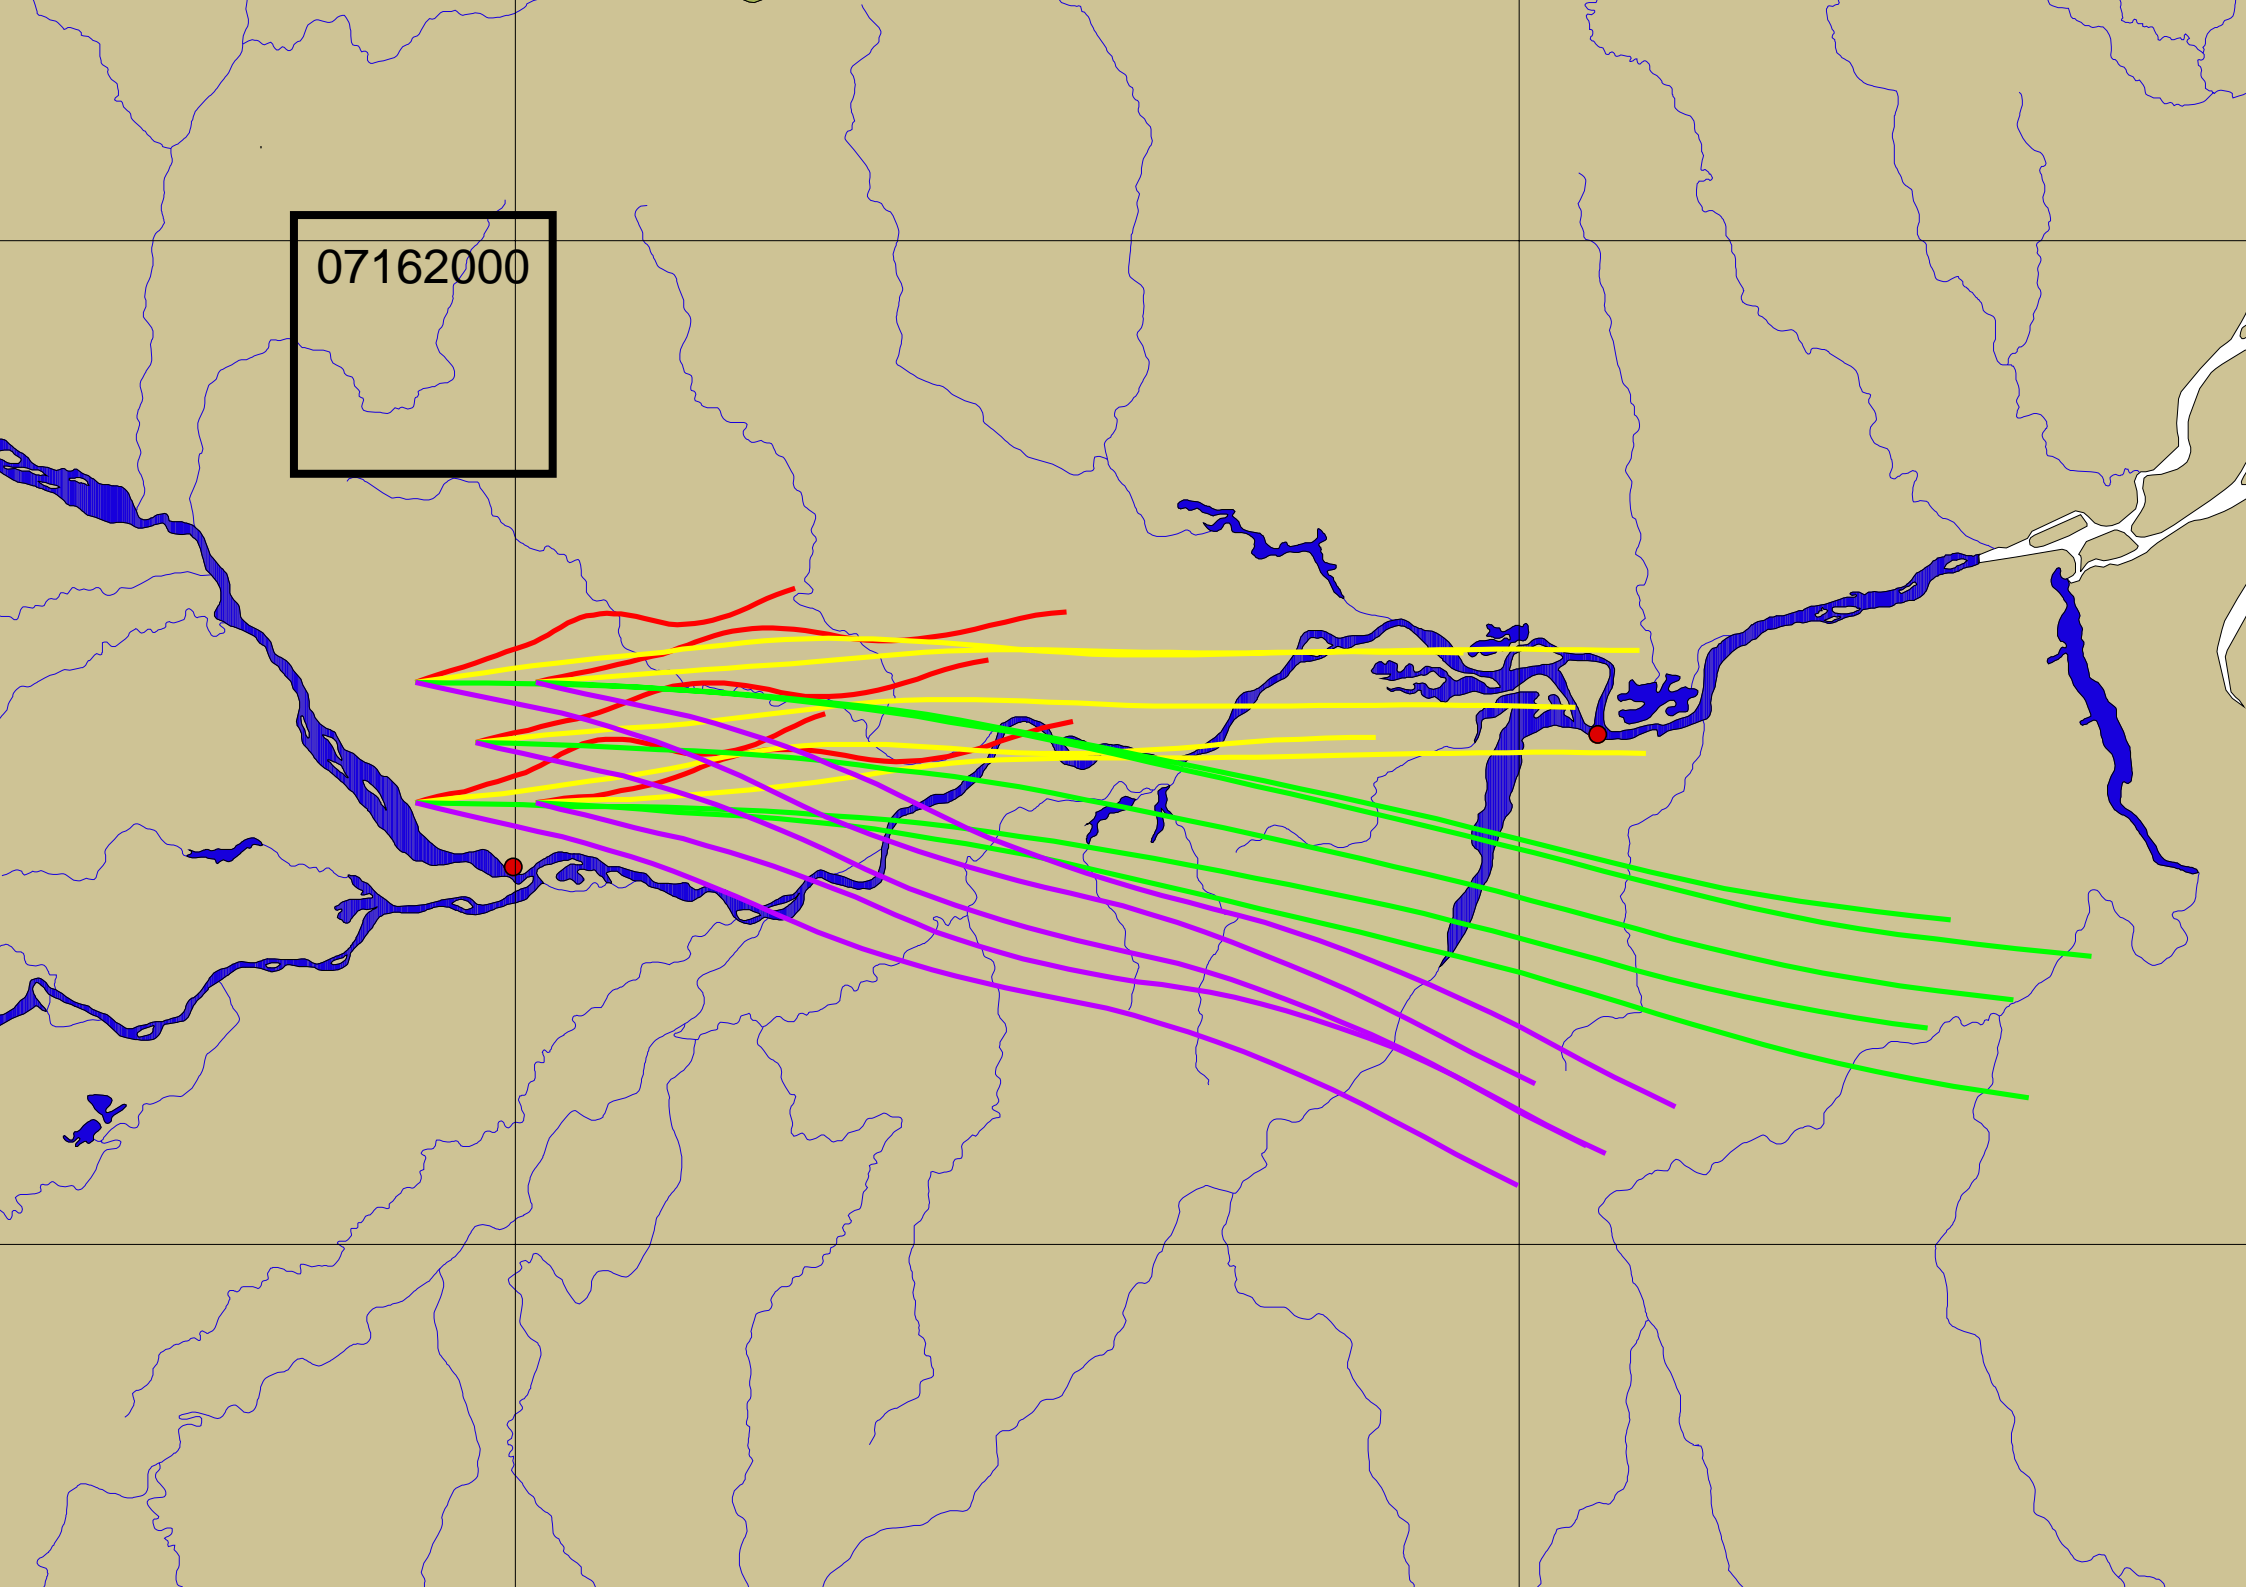

07162000

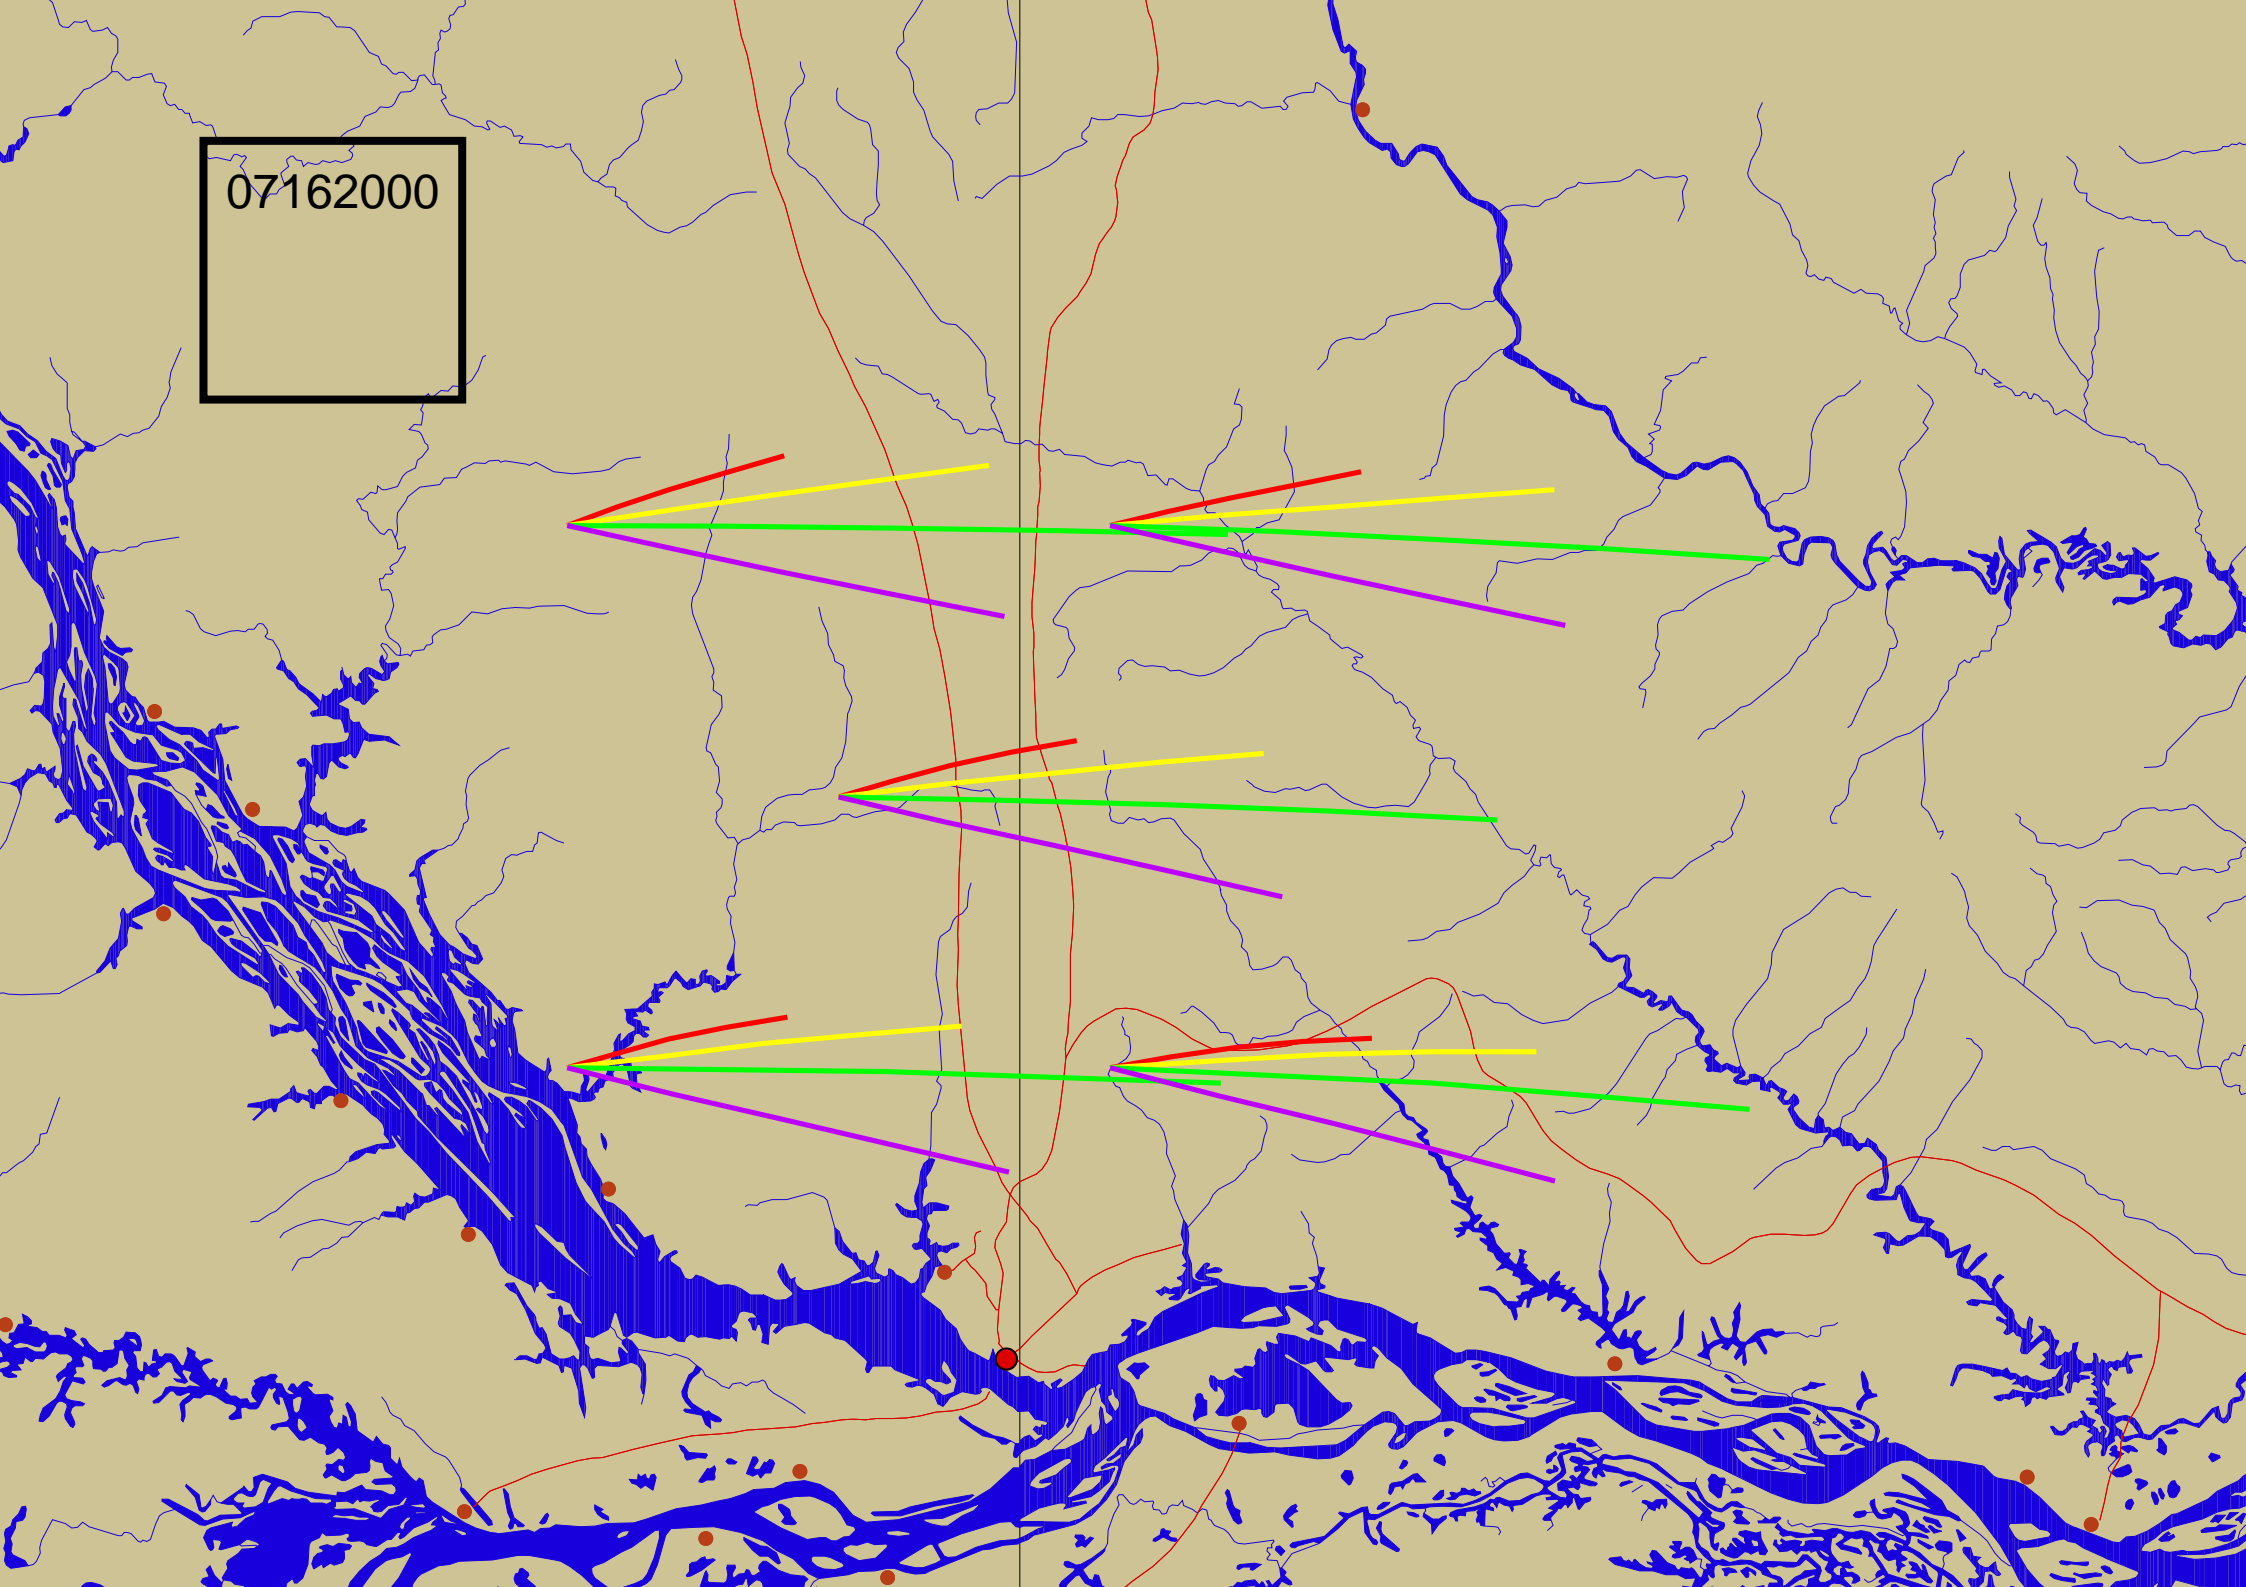

07171400

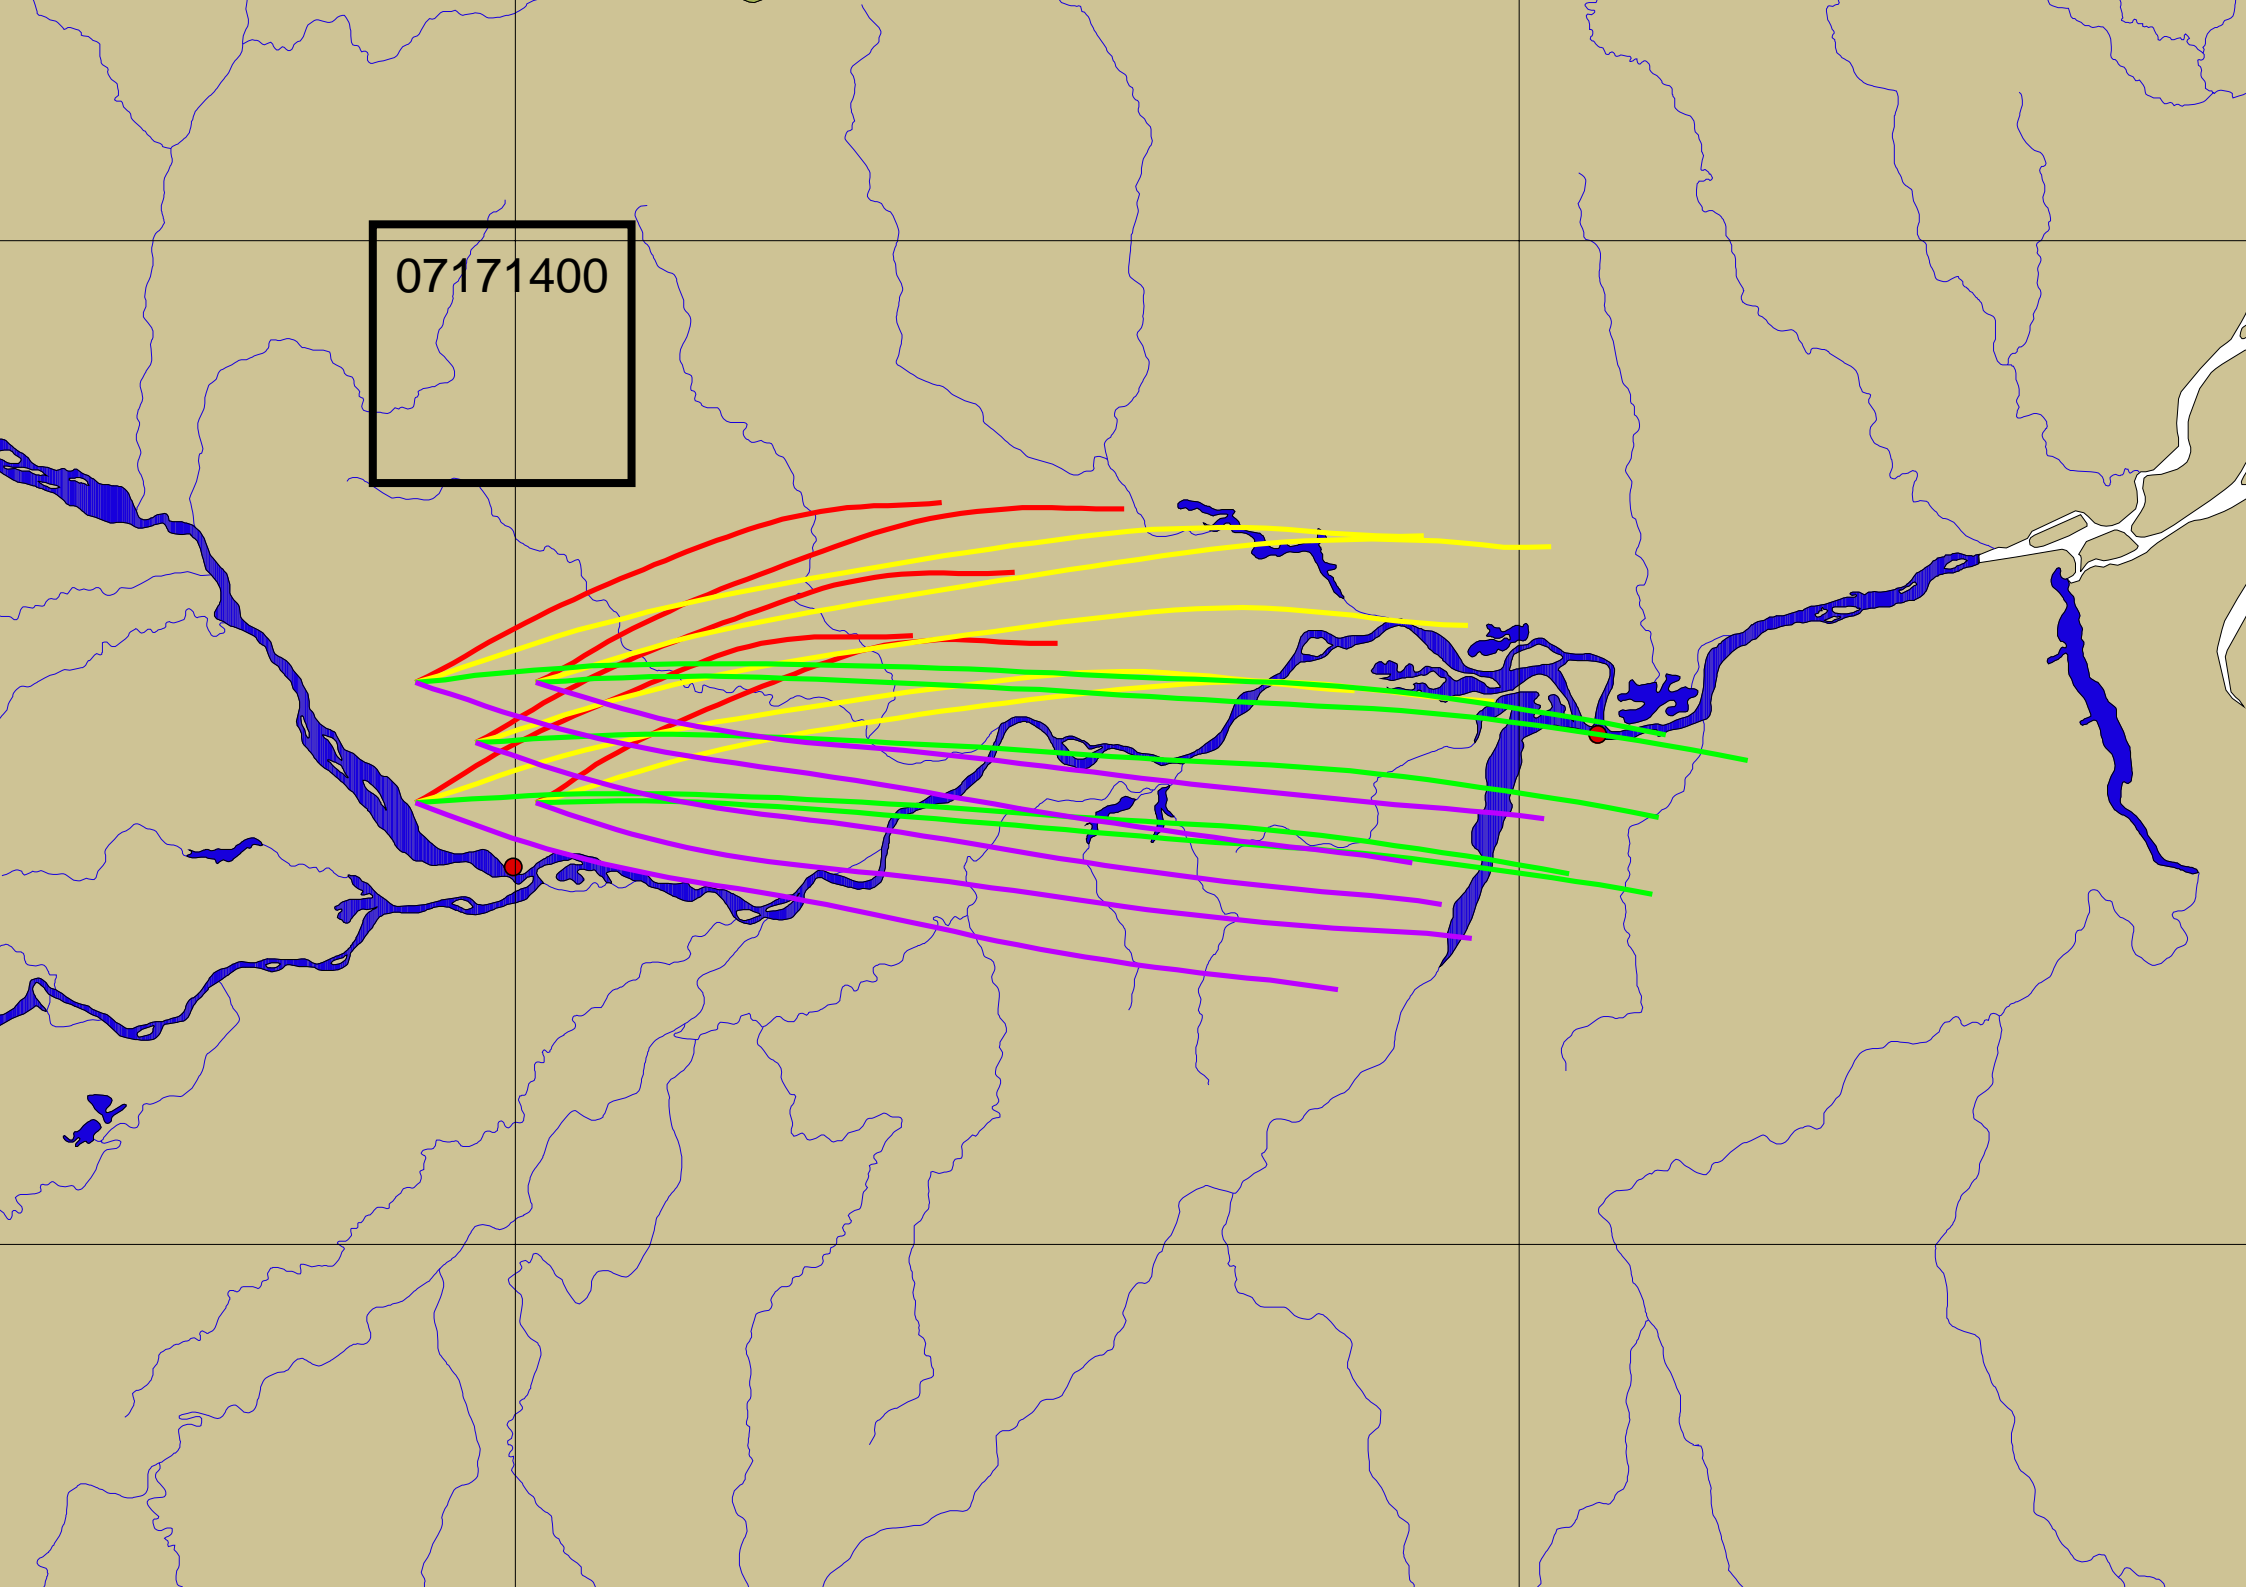

07171400

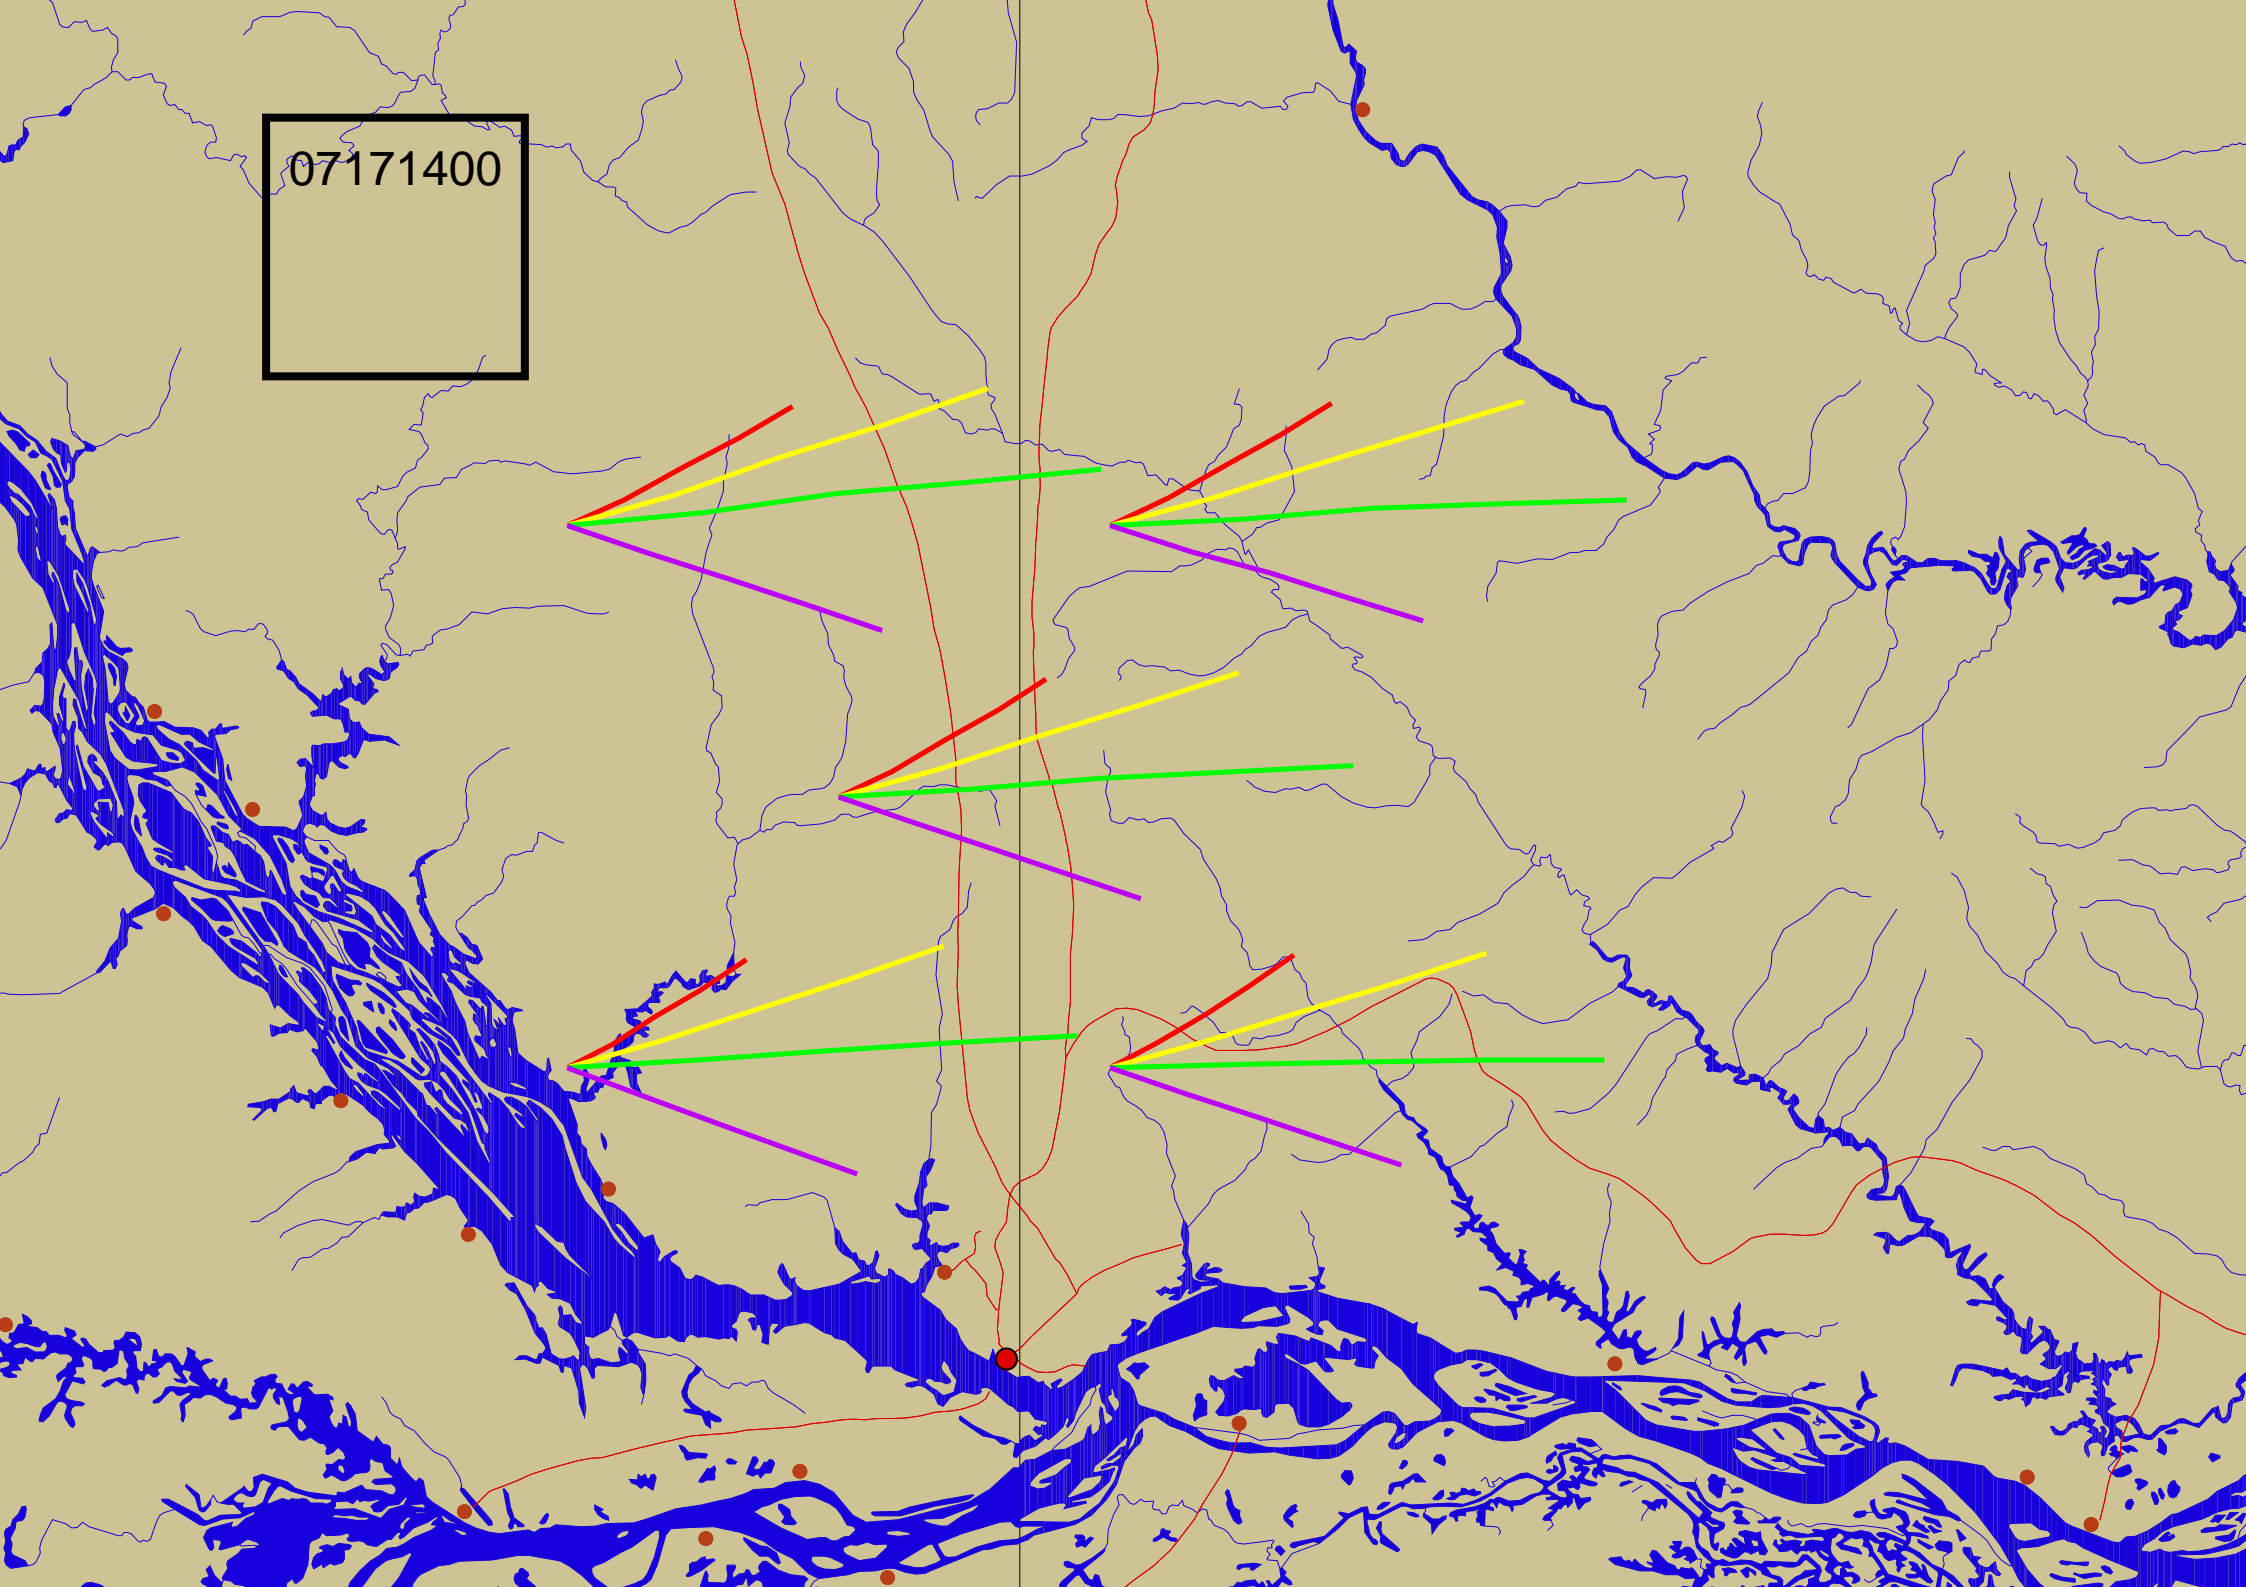

07181400

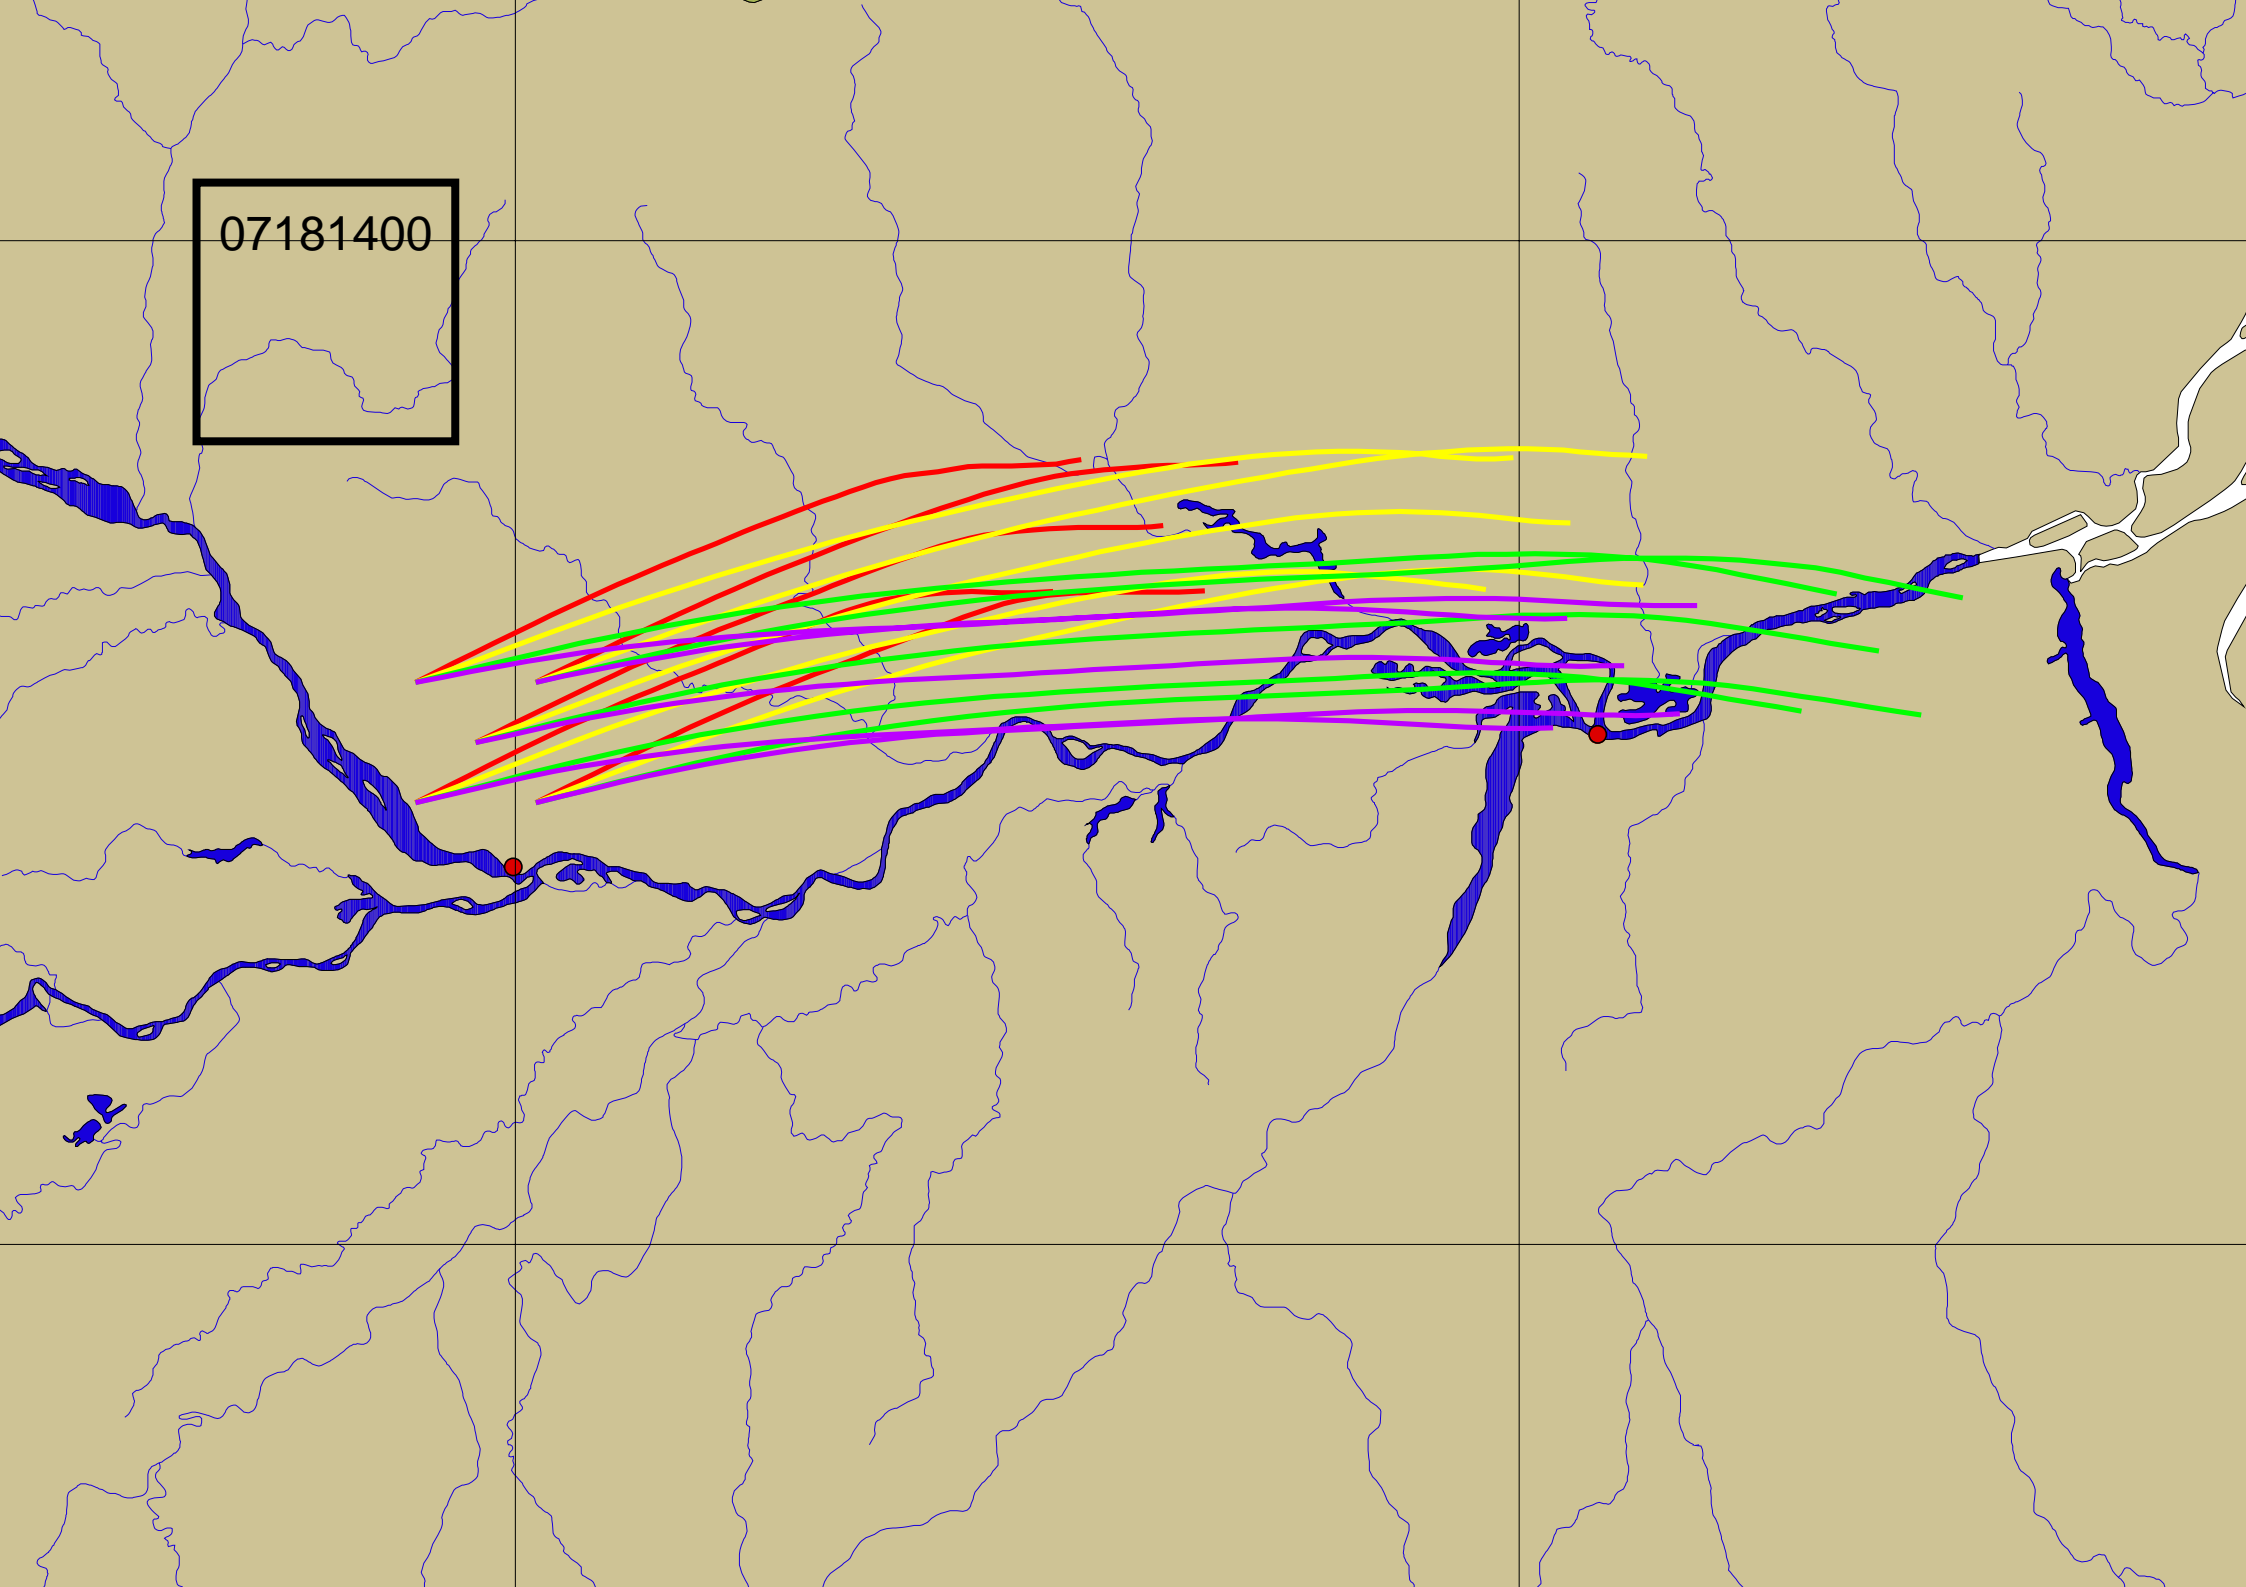

07172000

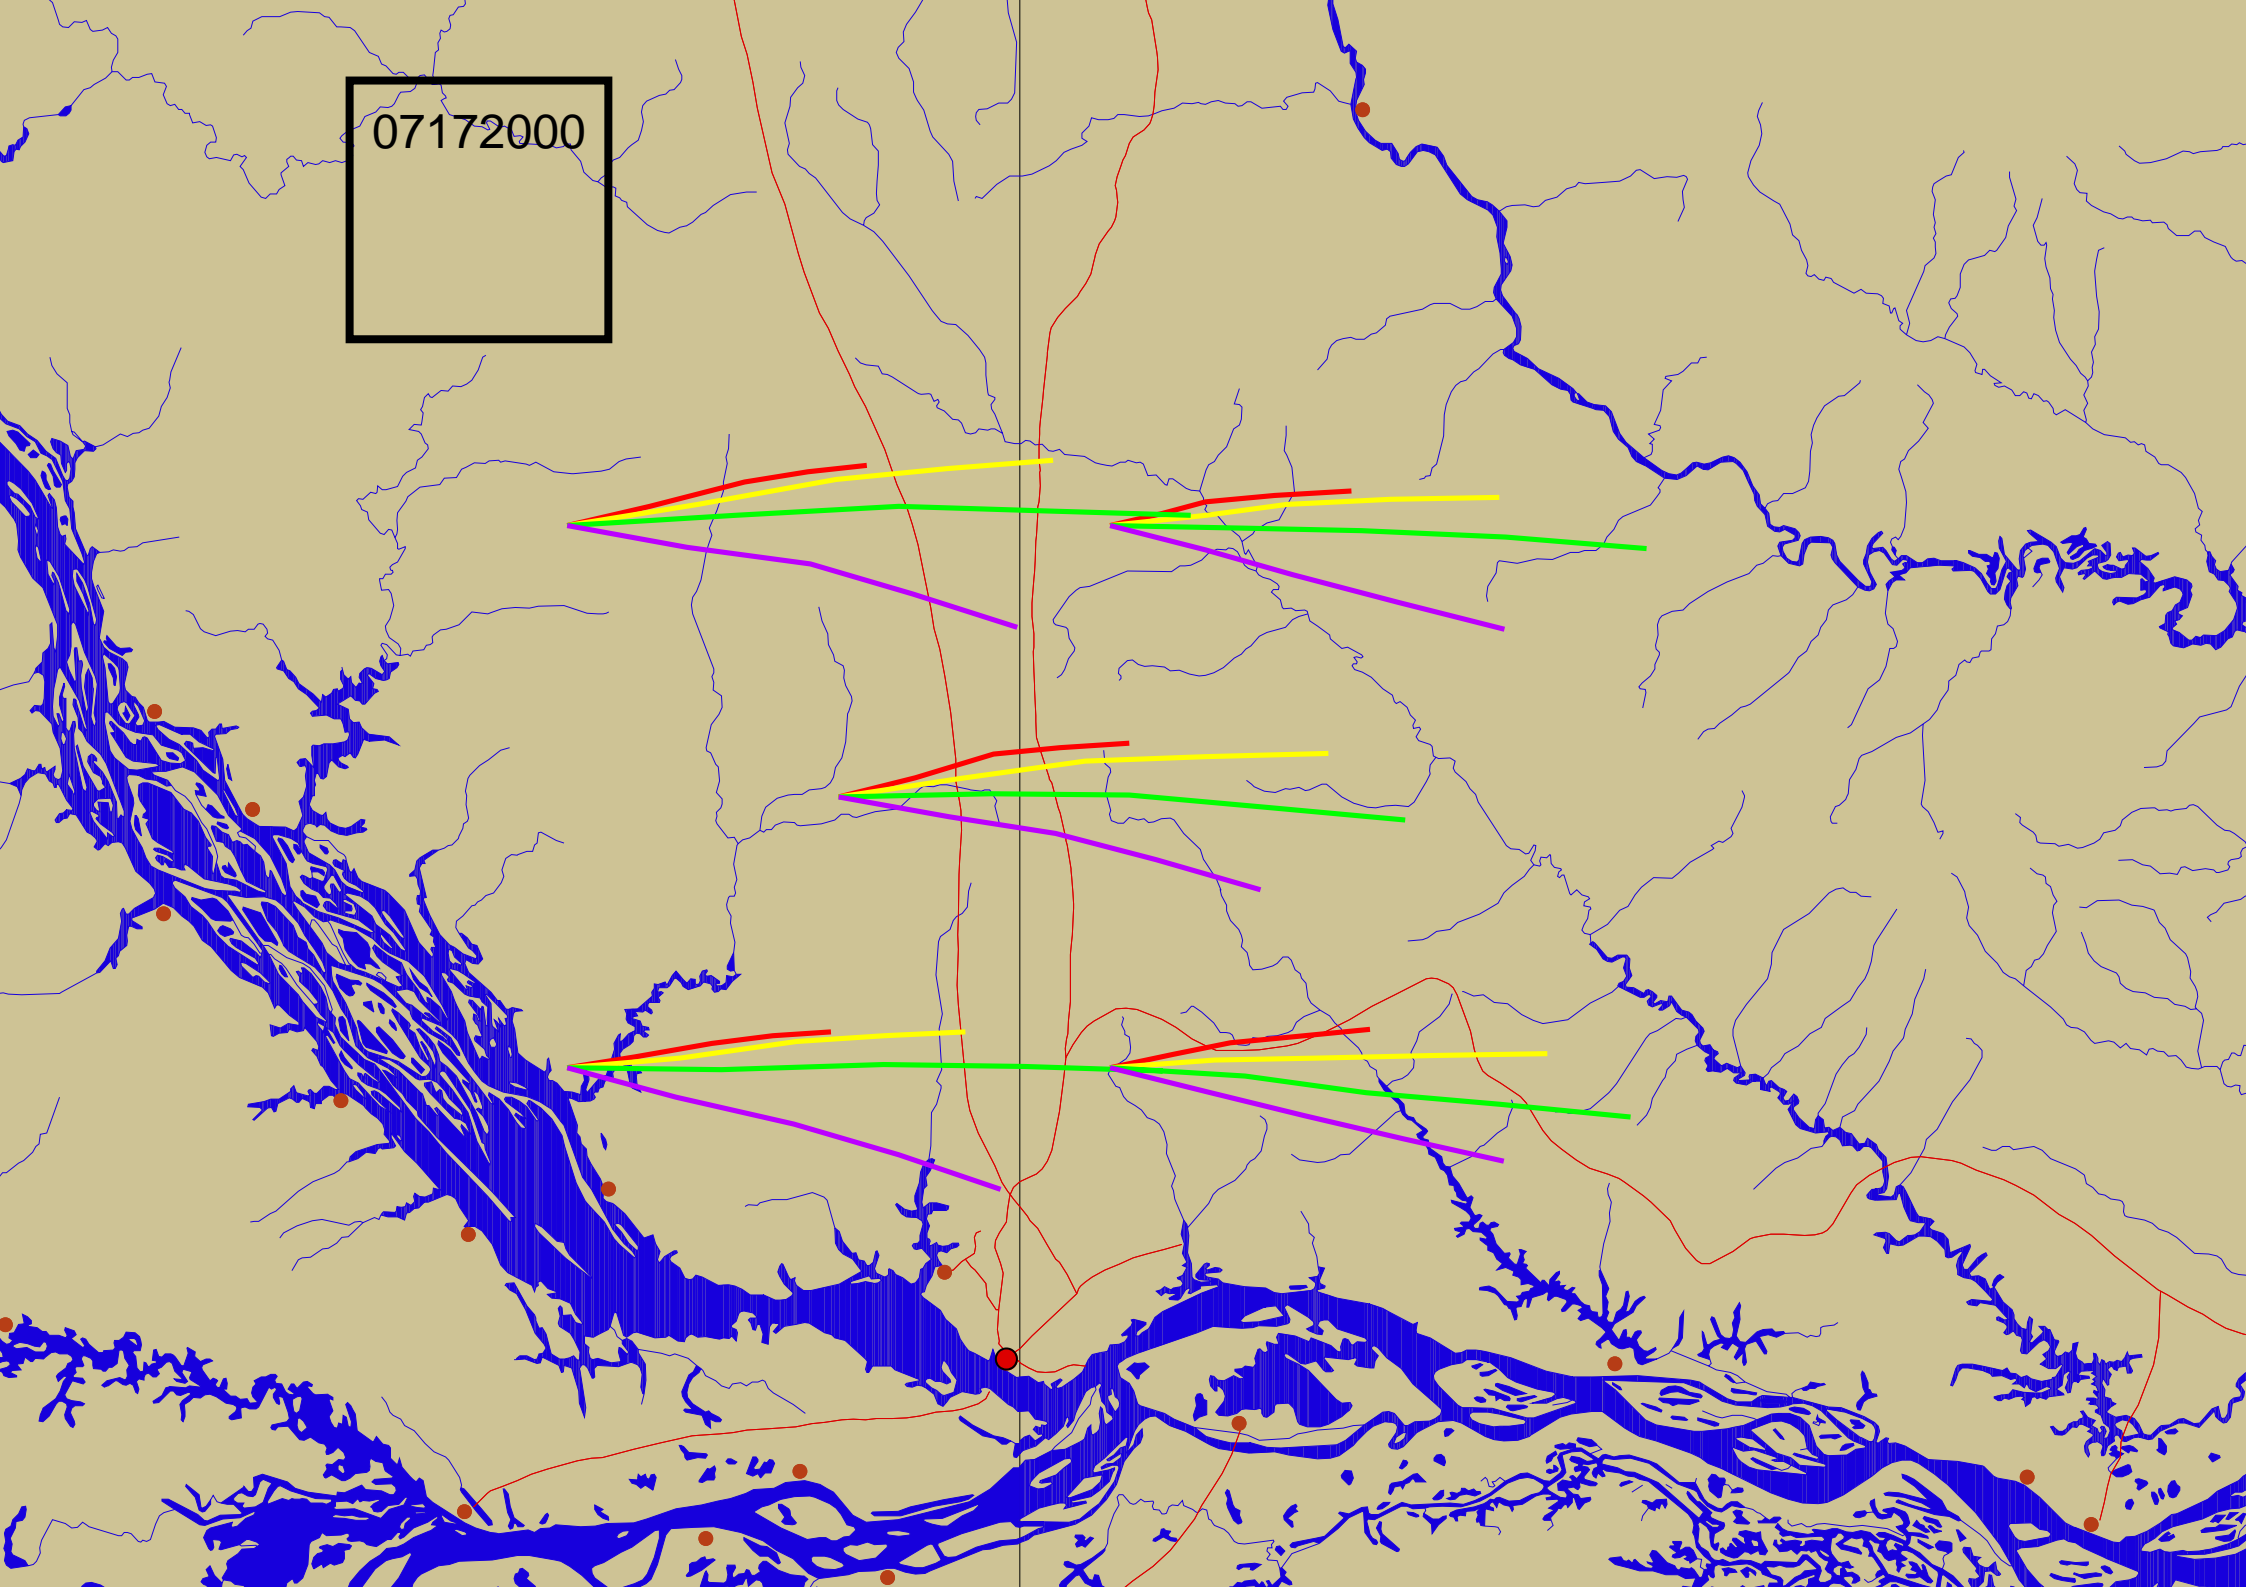

07181400





07181400

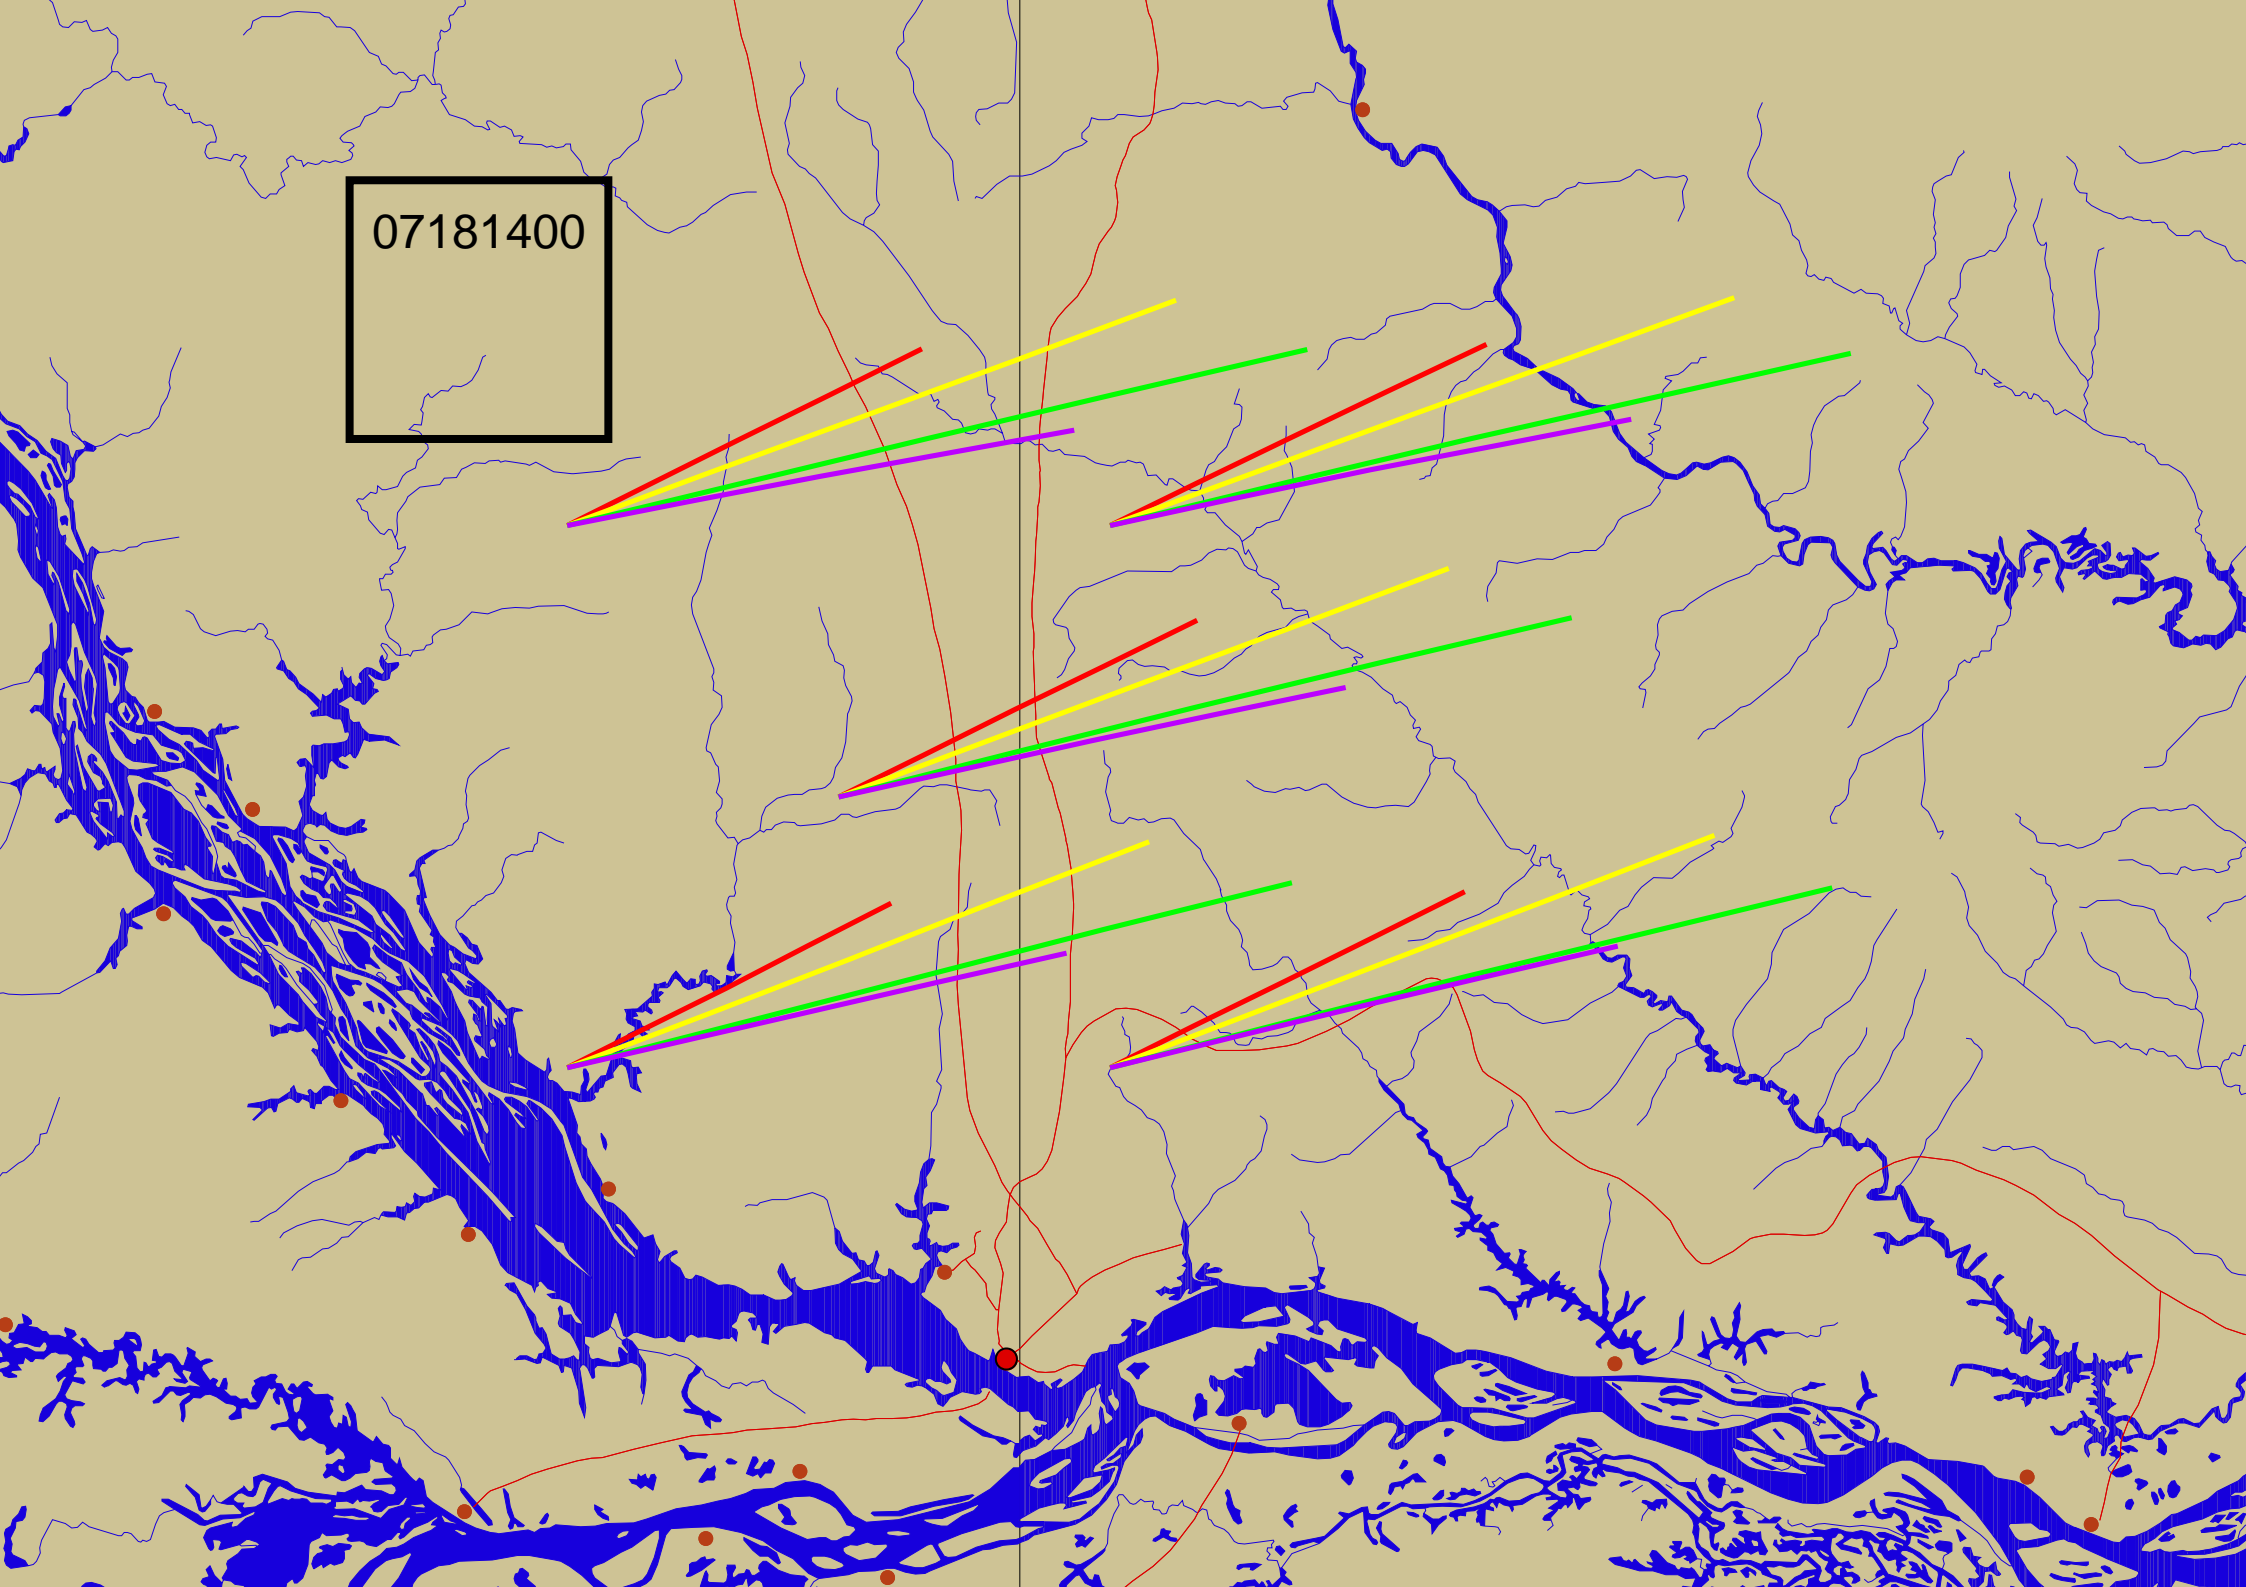

07182000

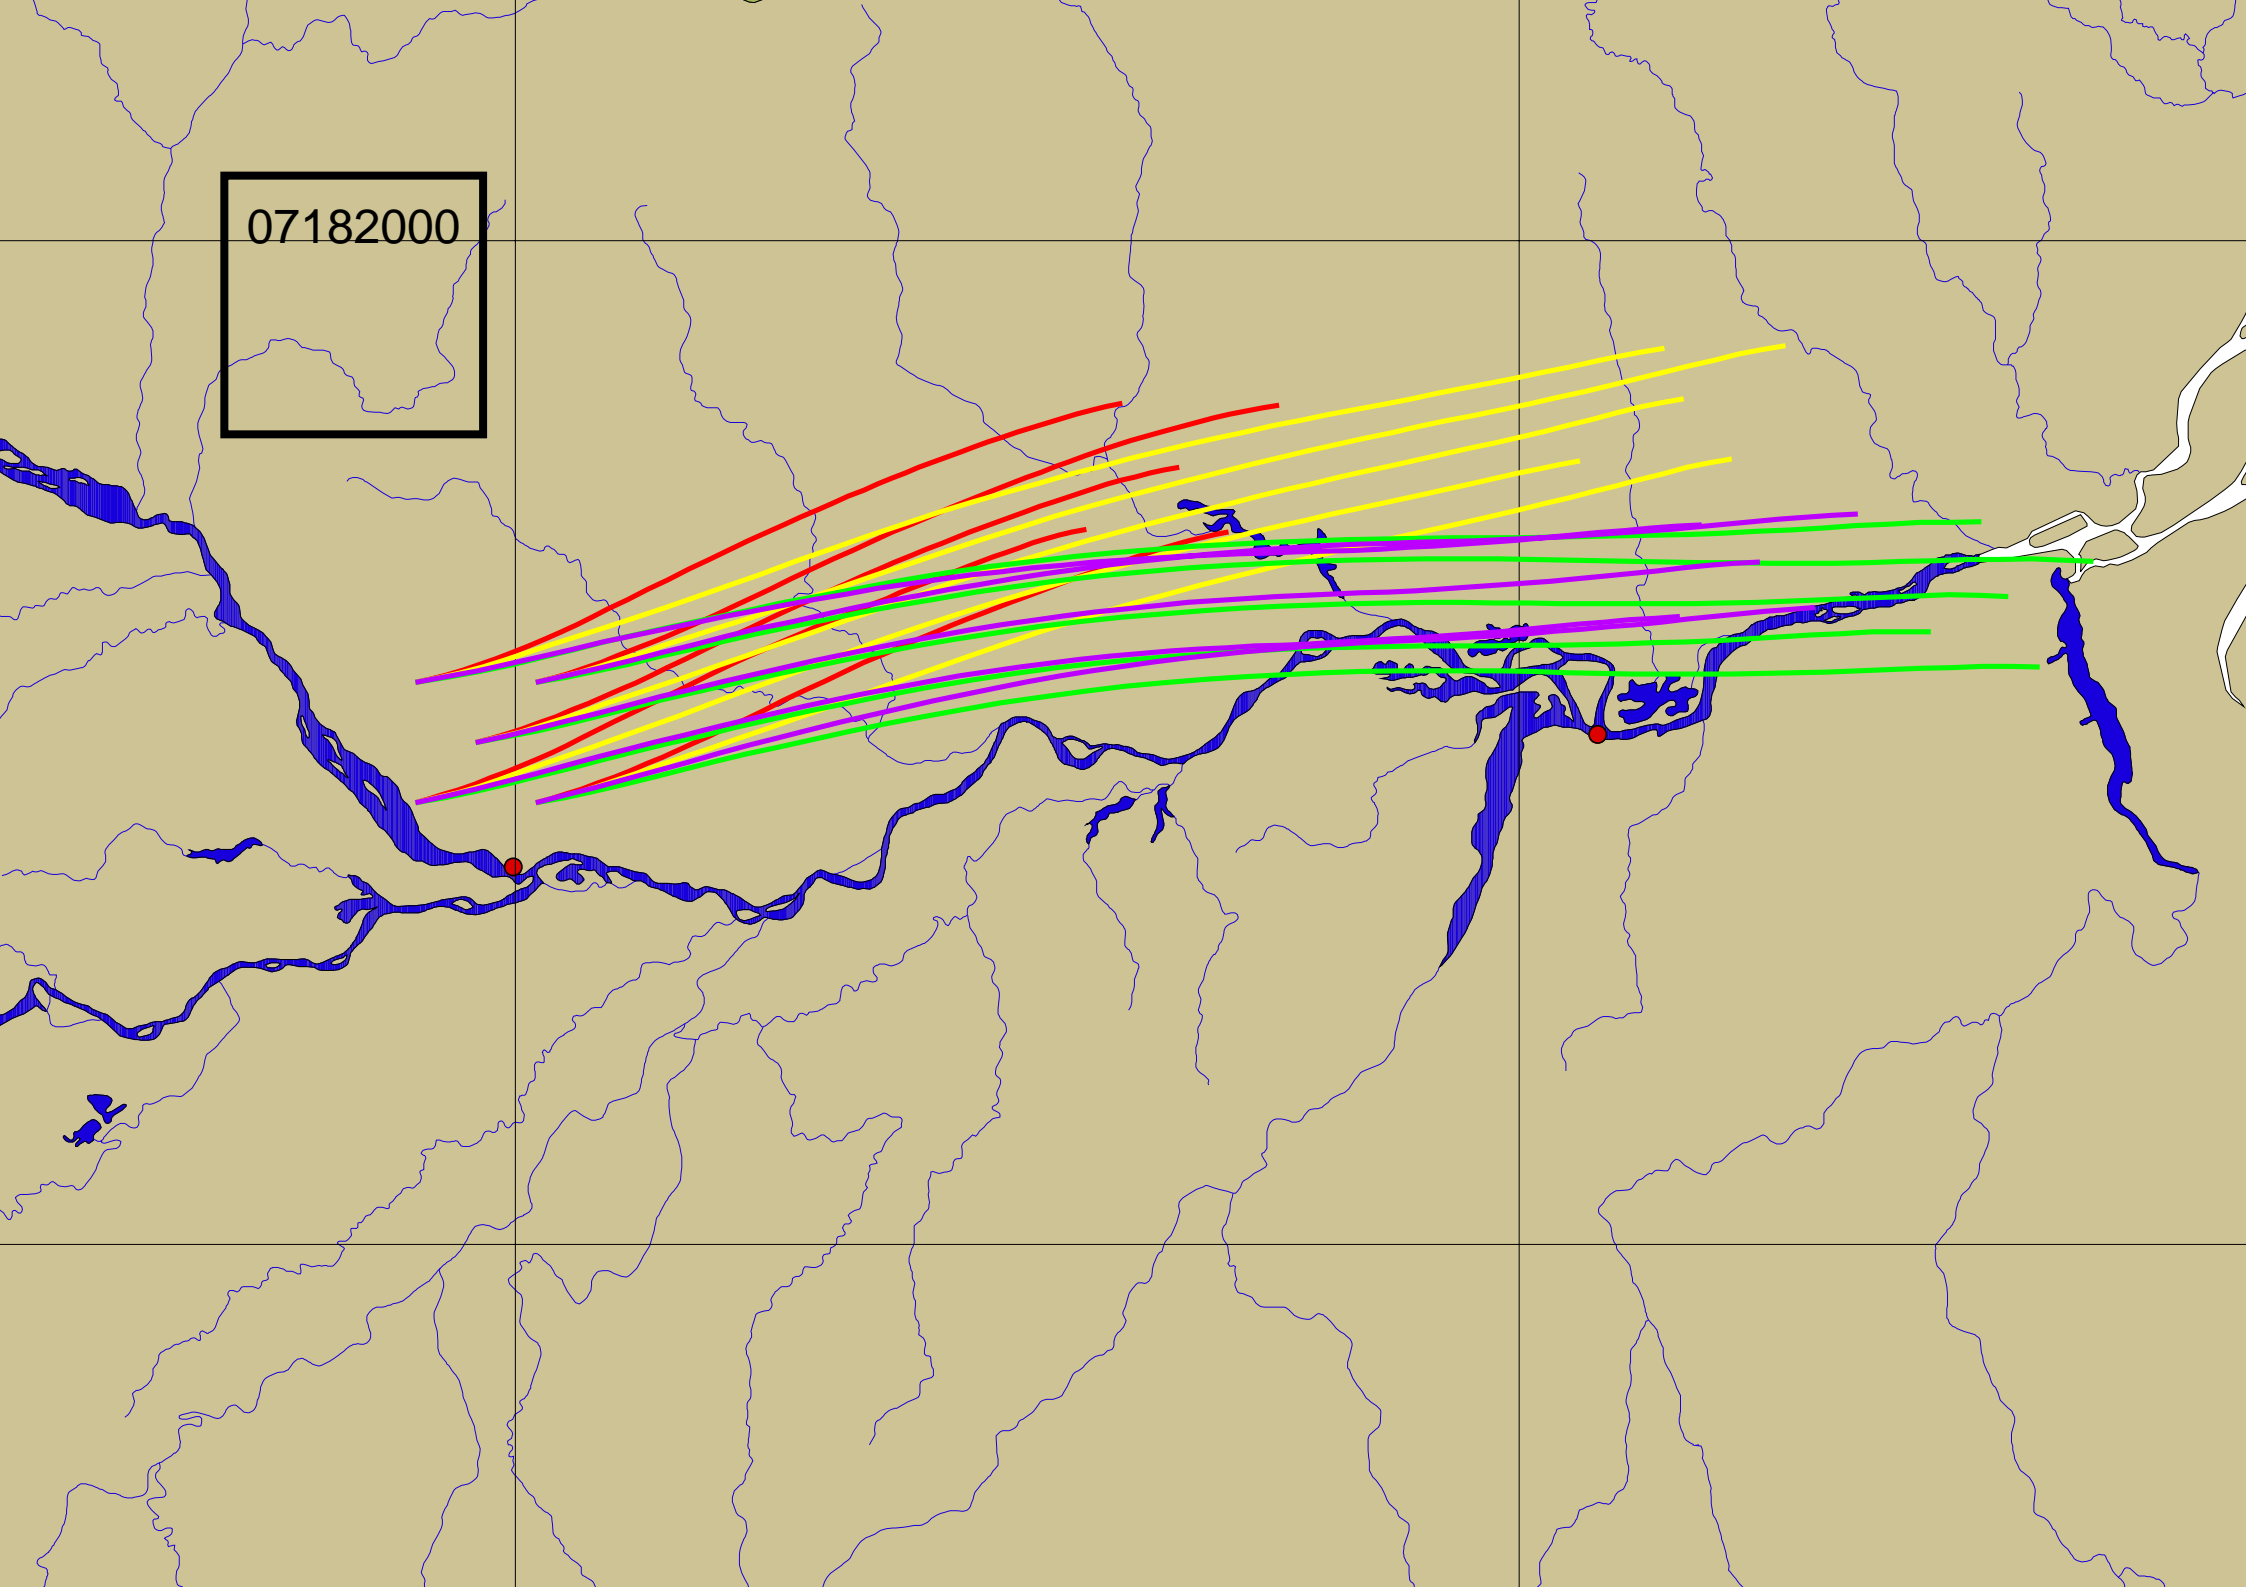

07182000

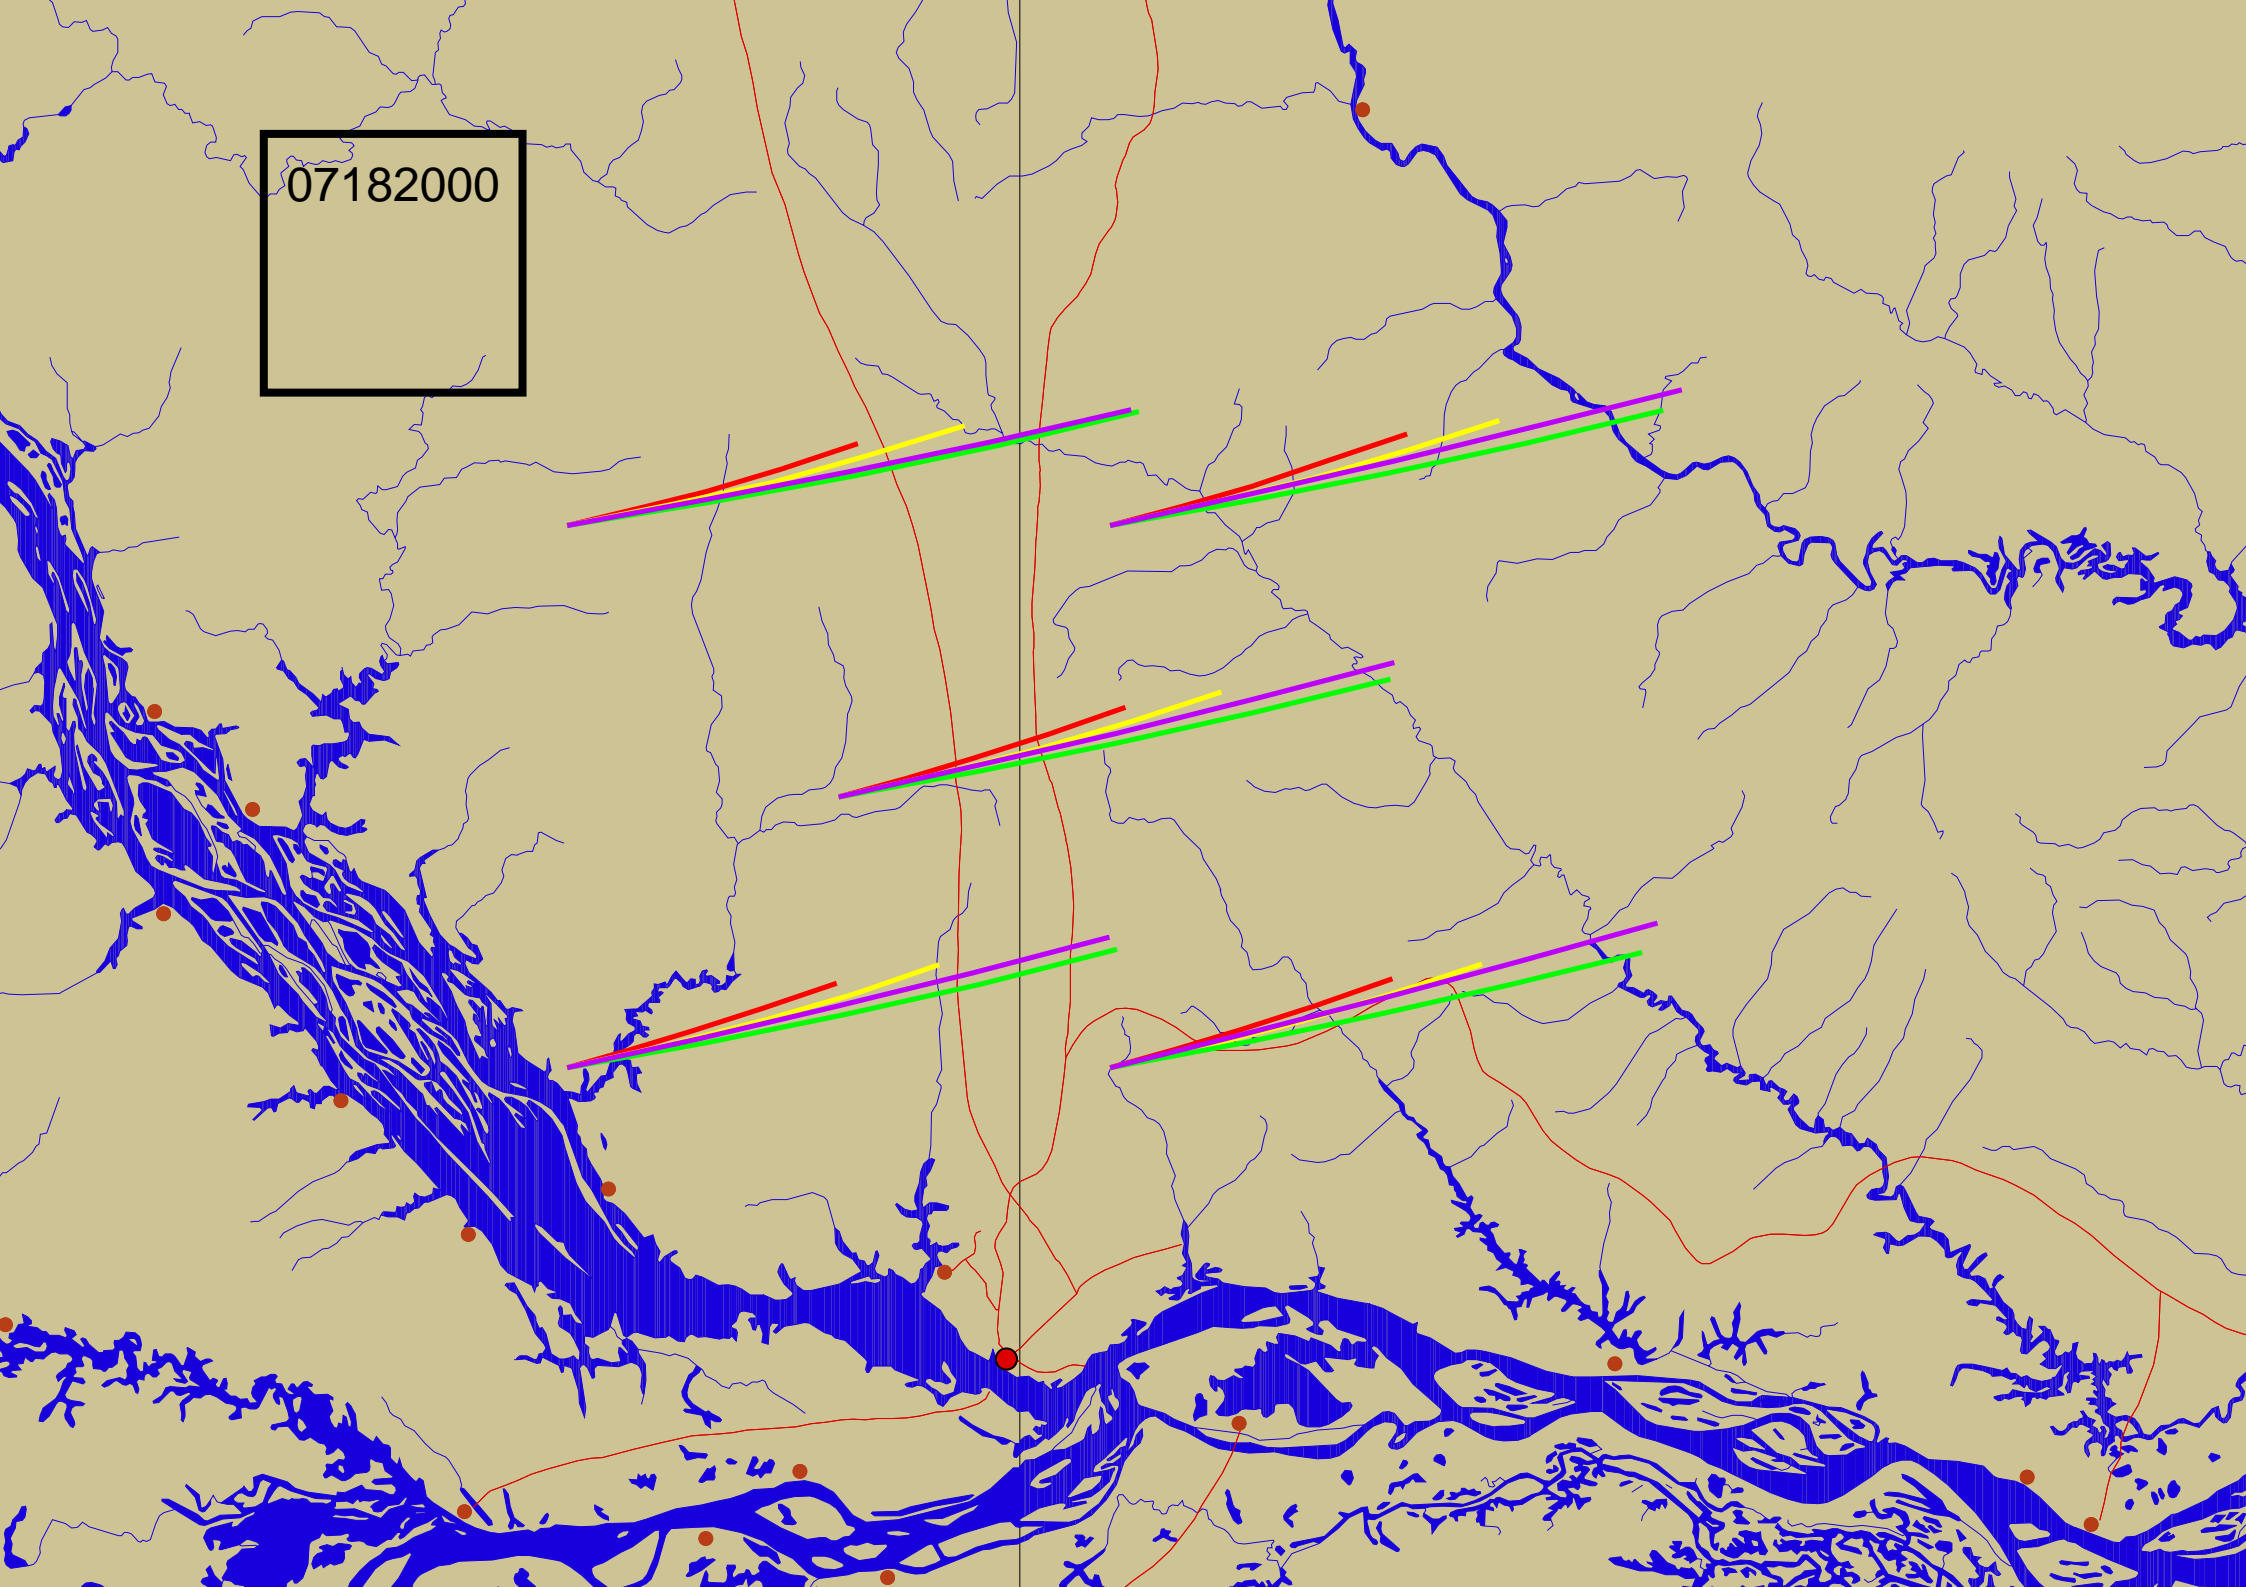

07201400

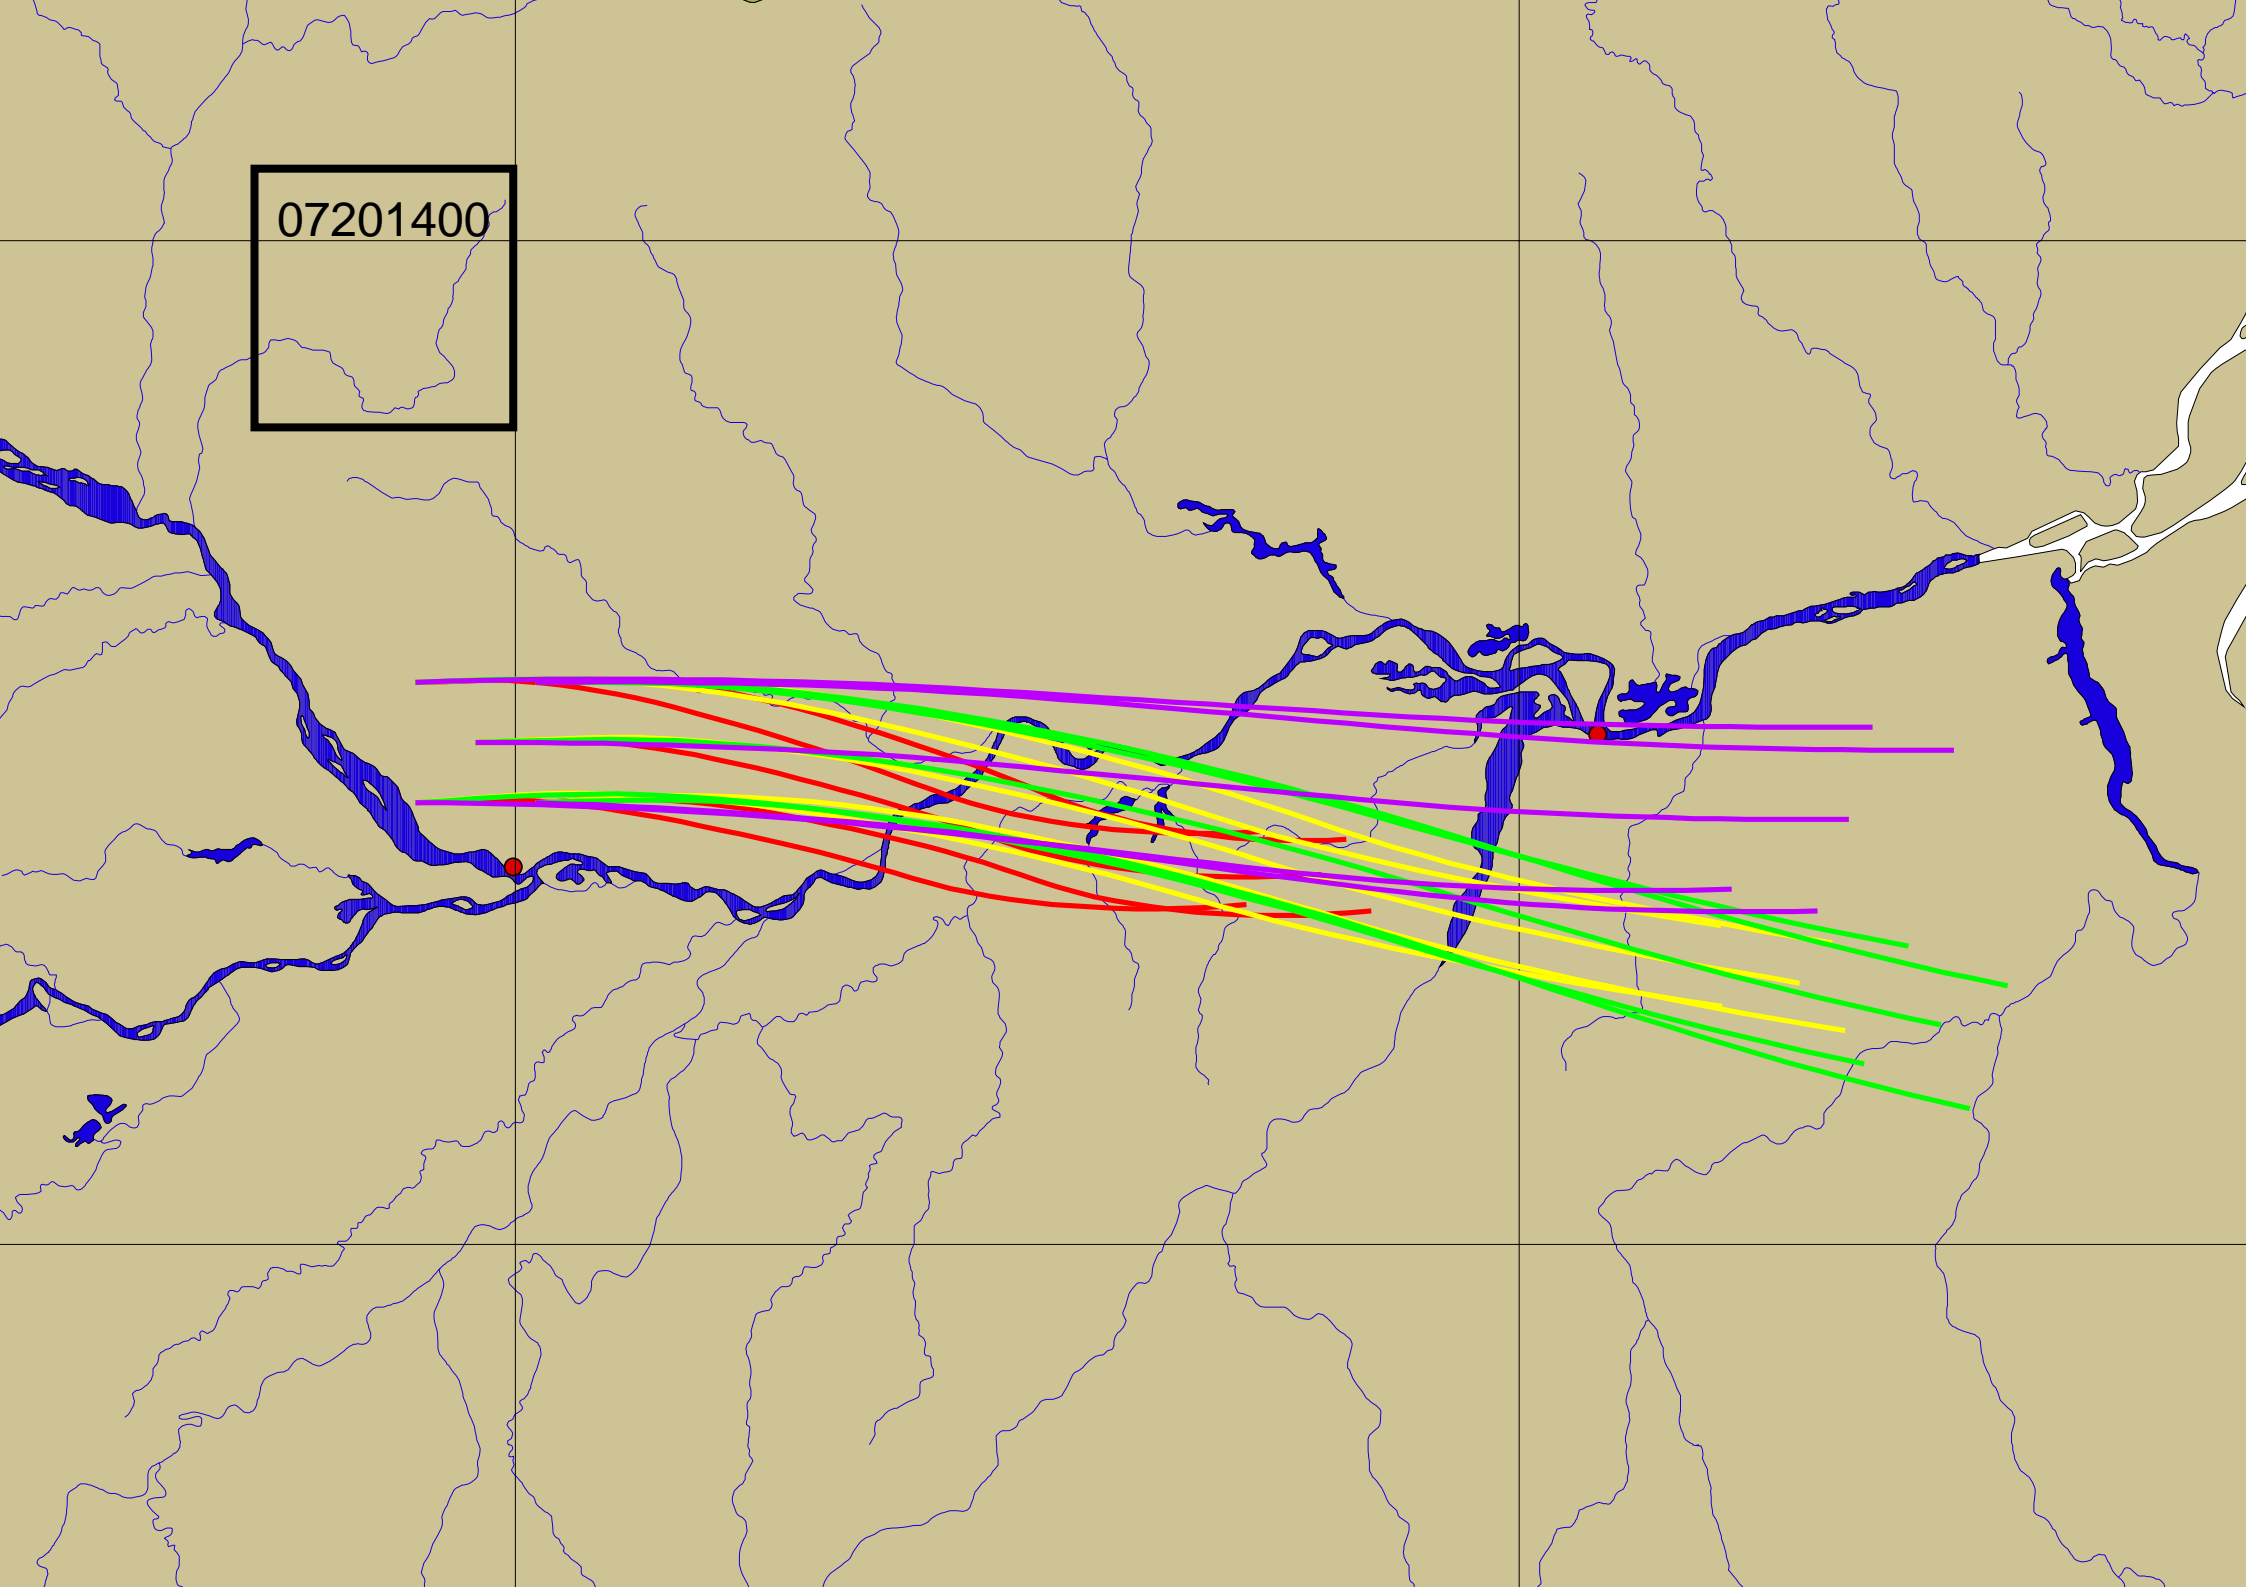

07201400

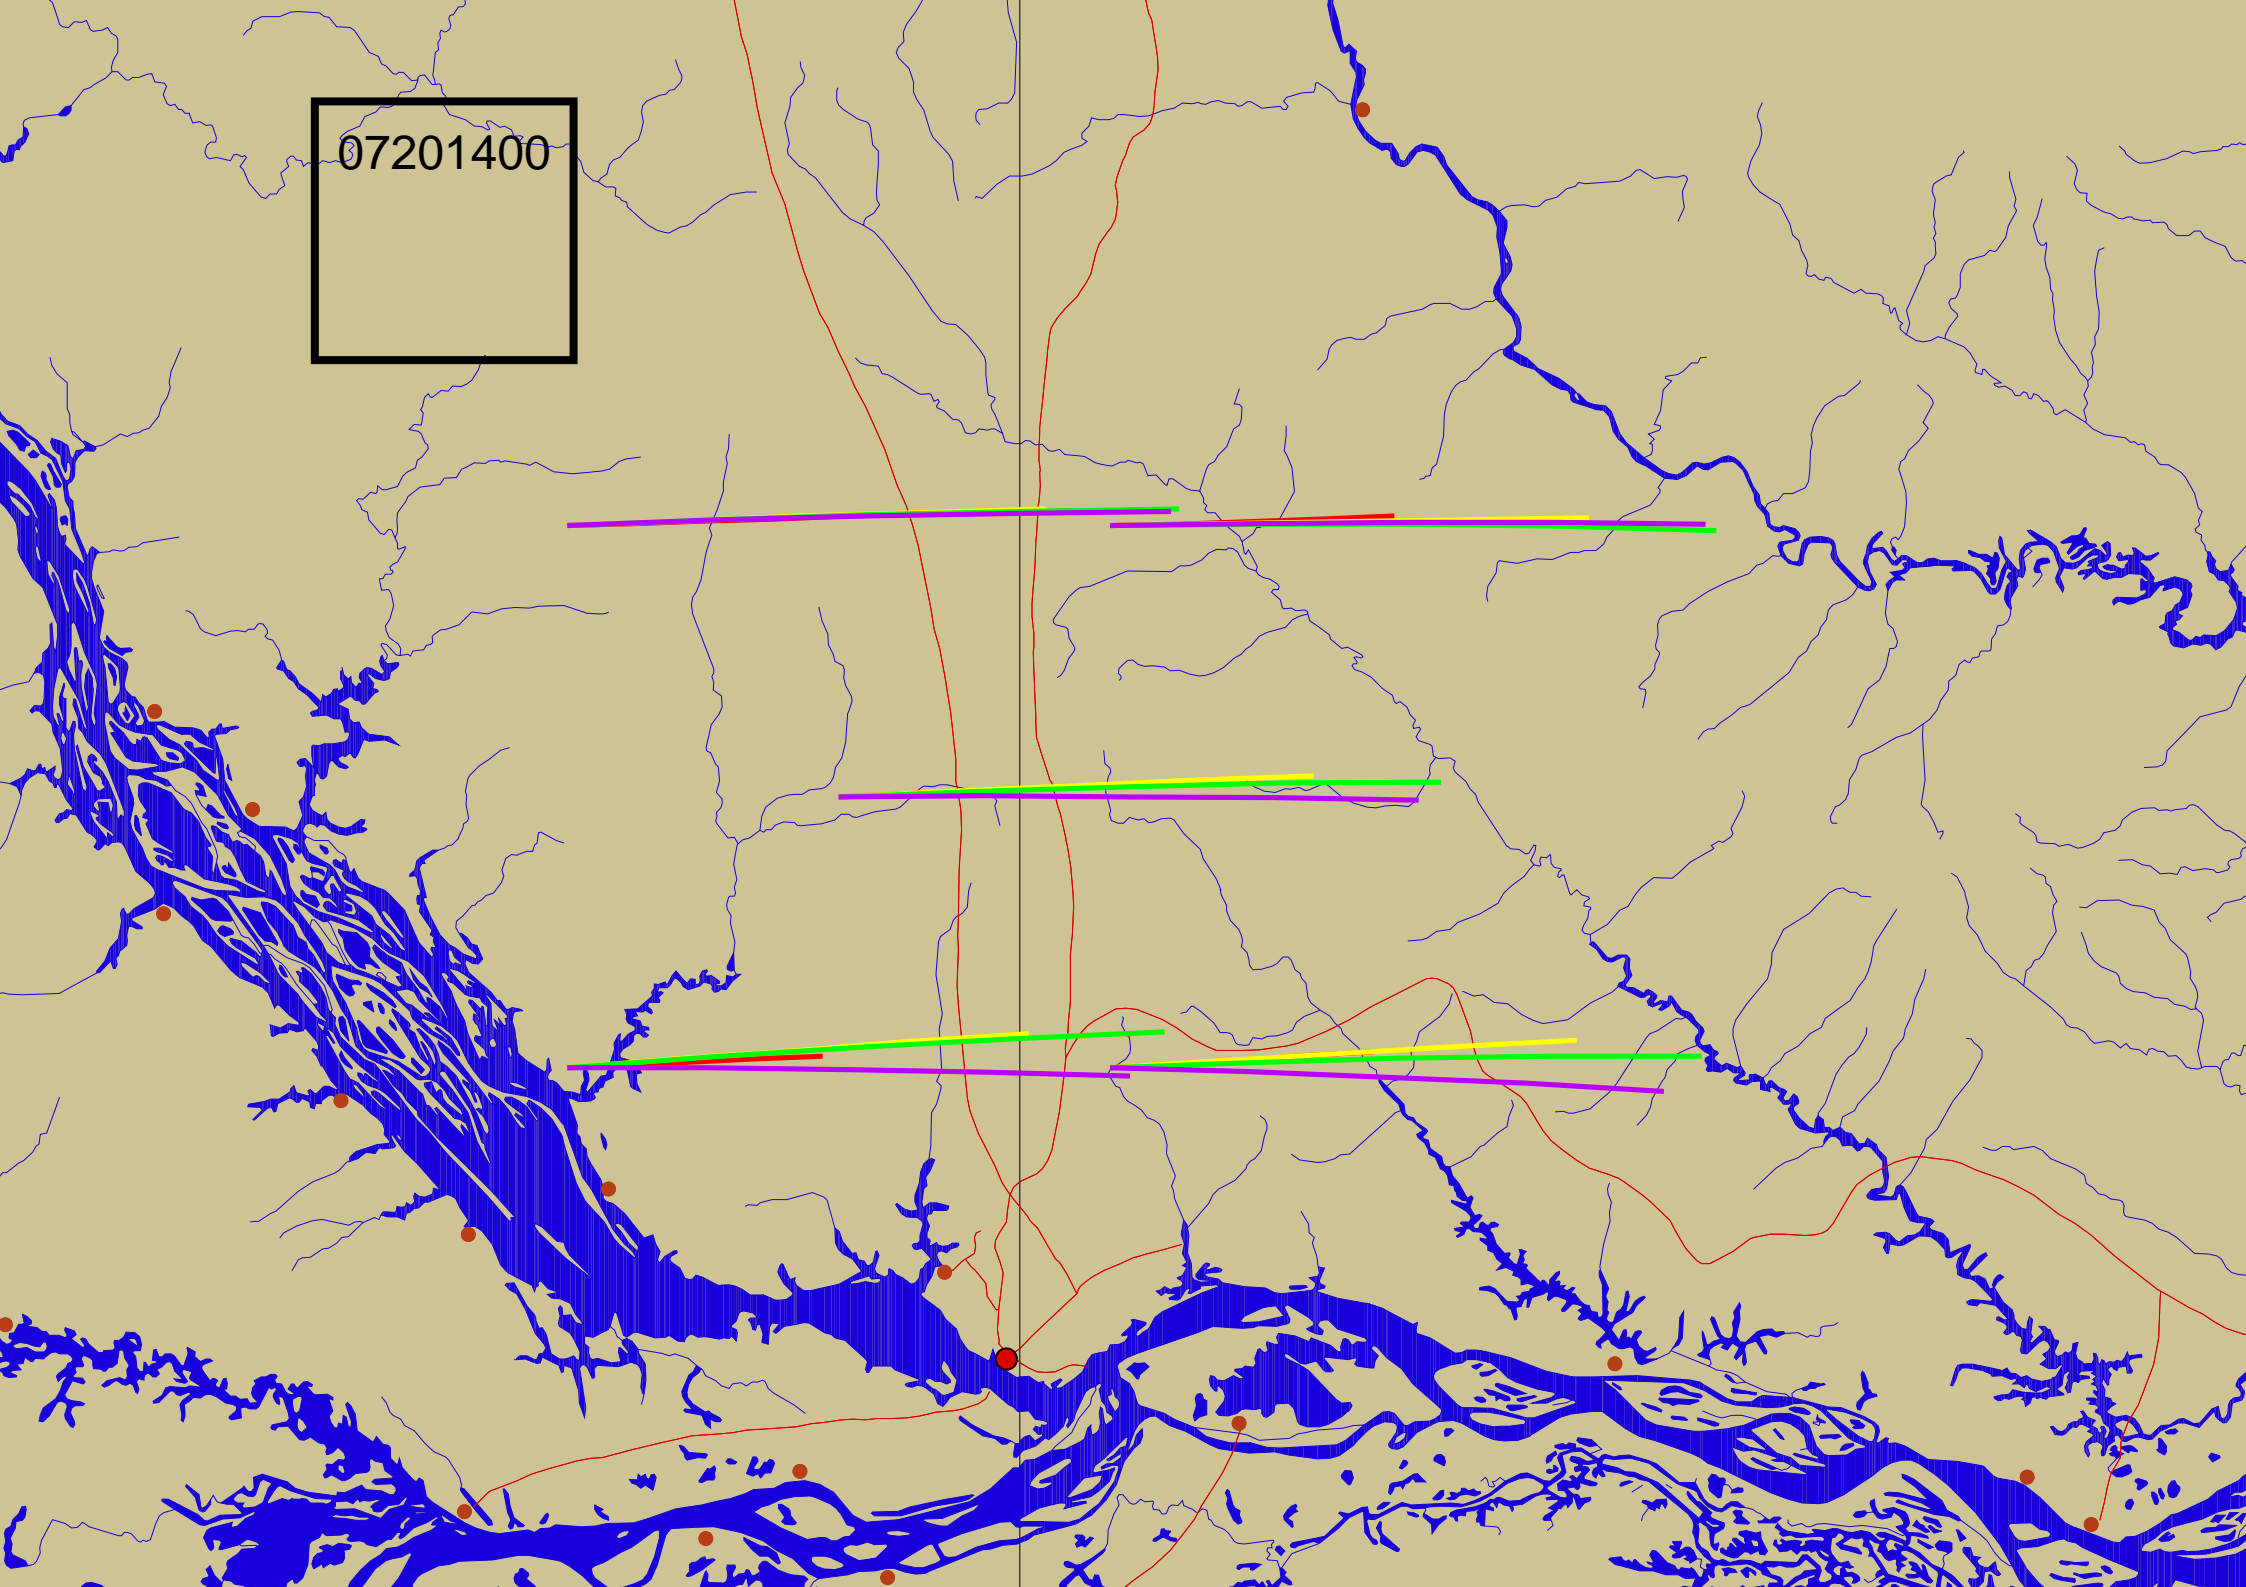

07202000

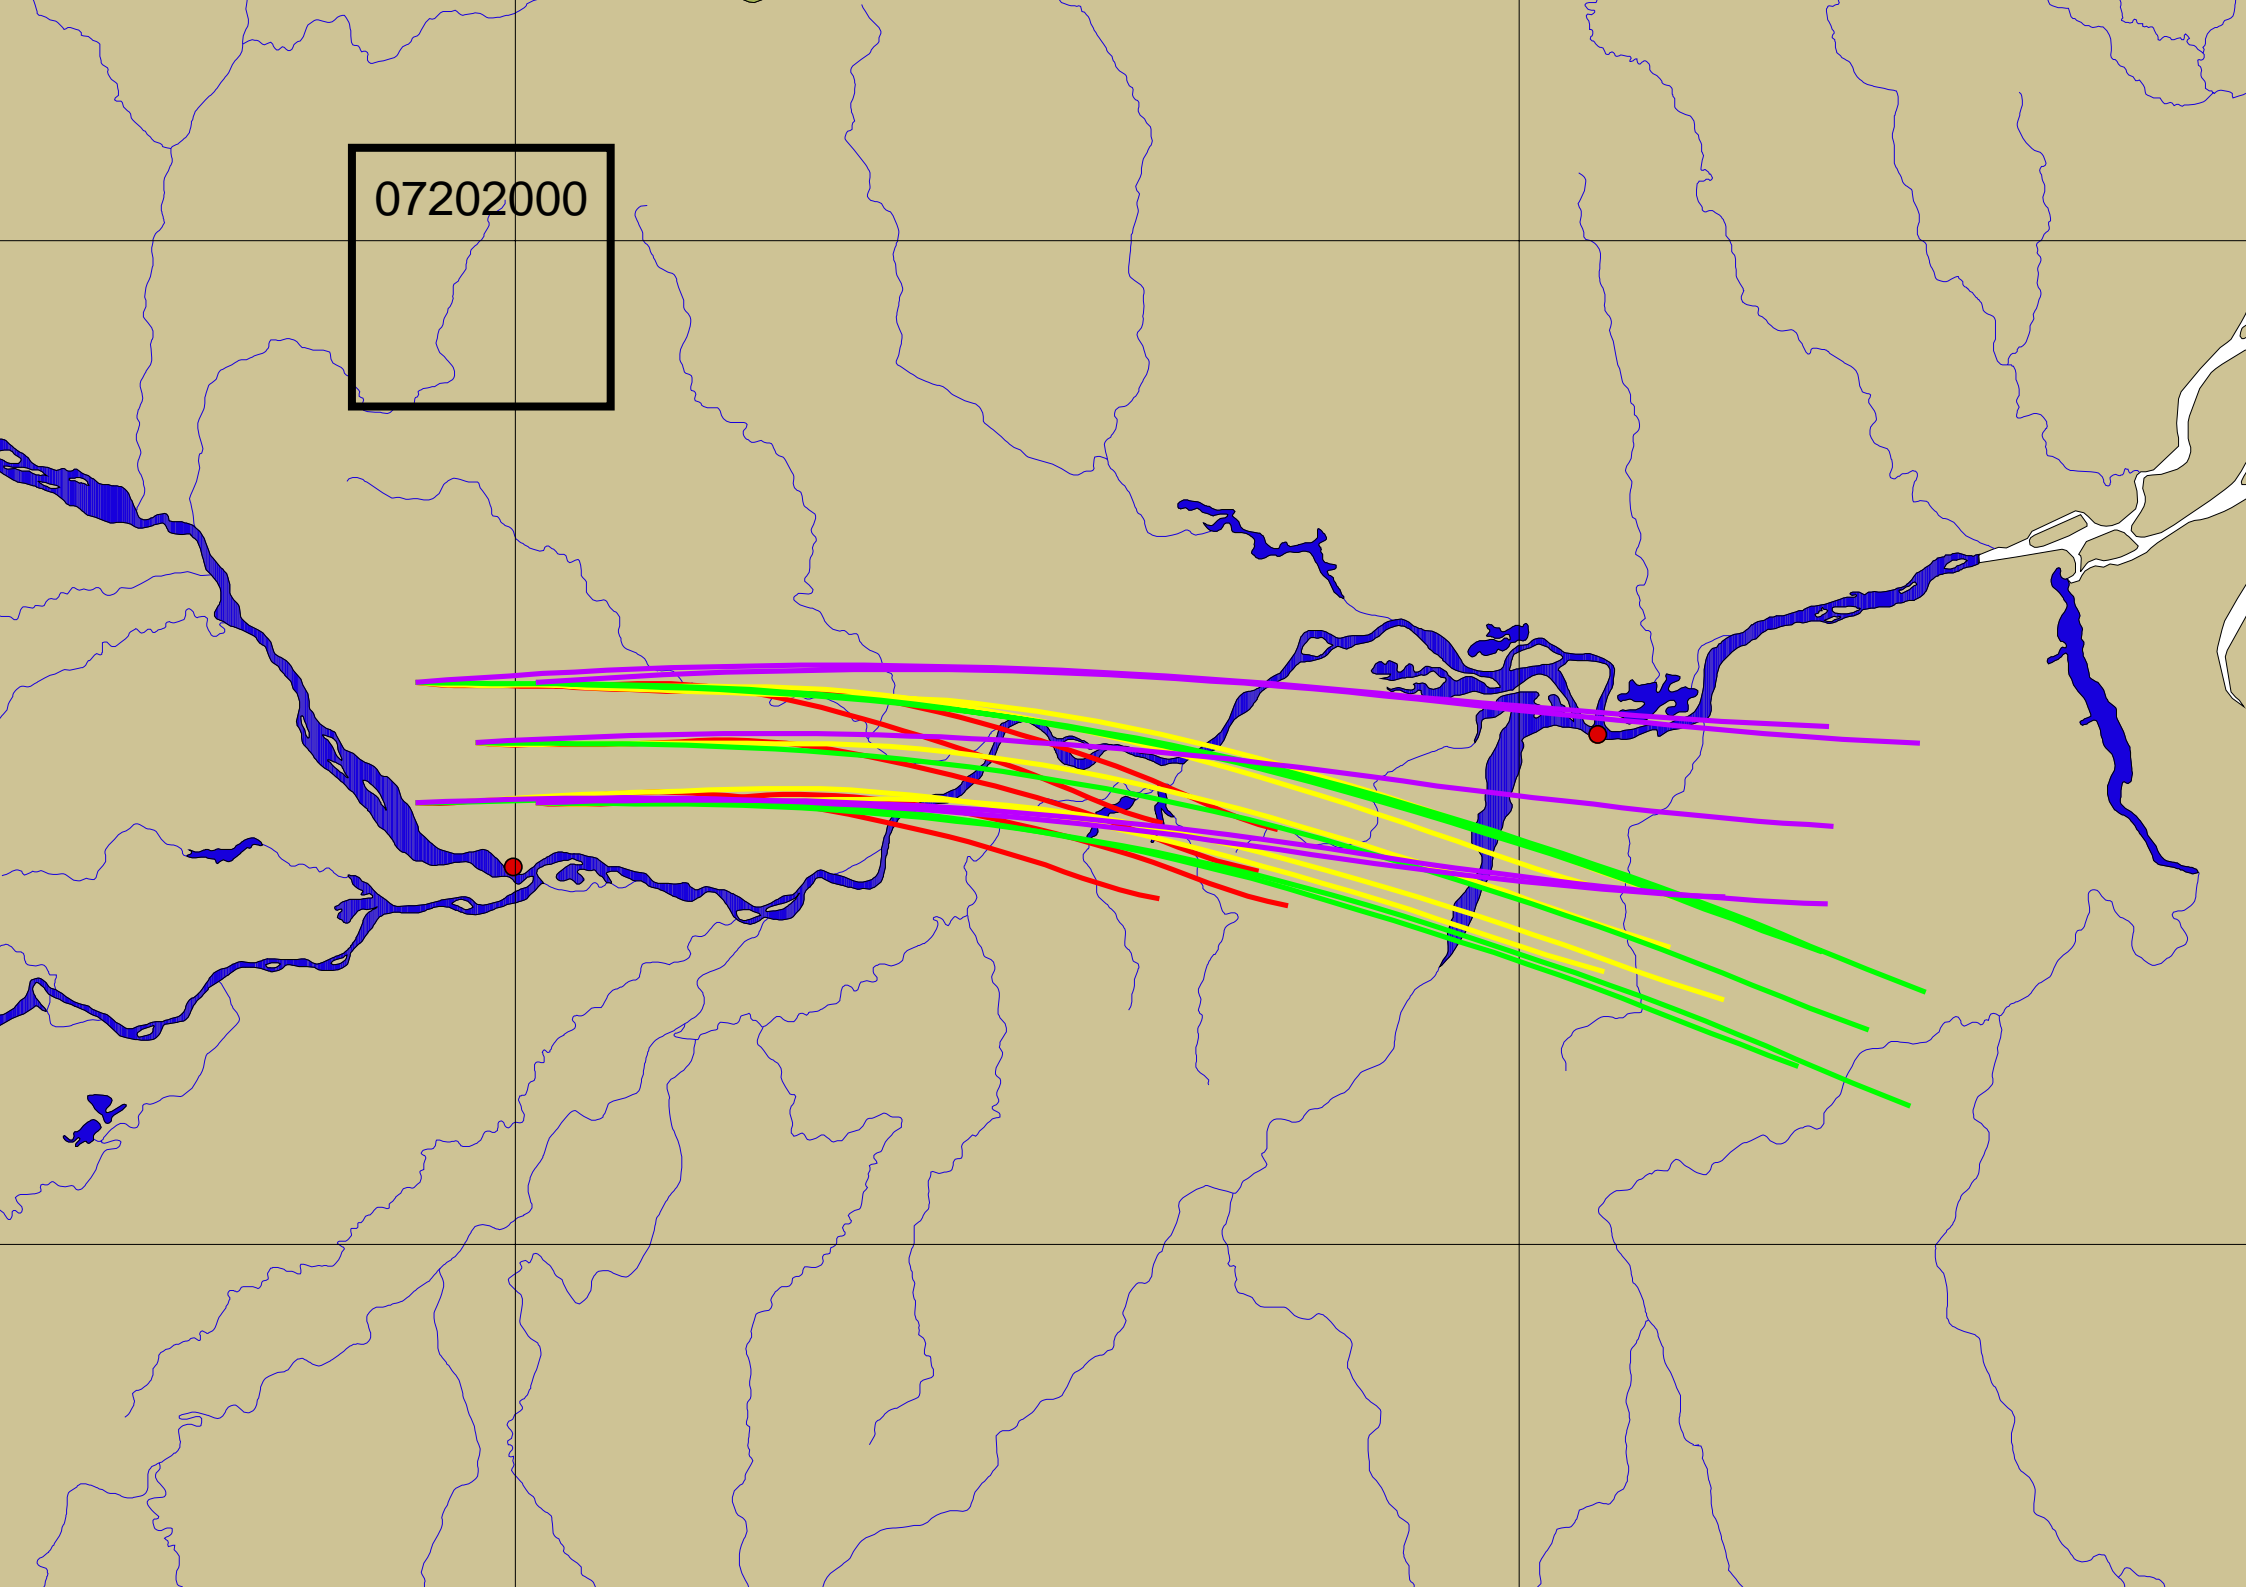

07202000

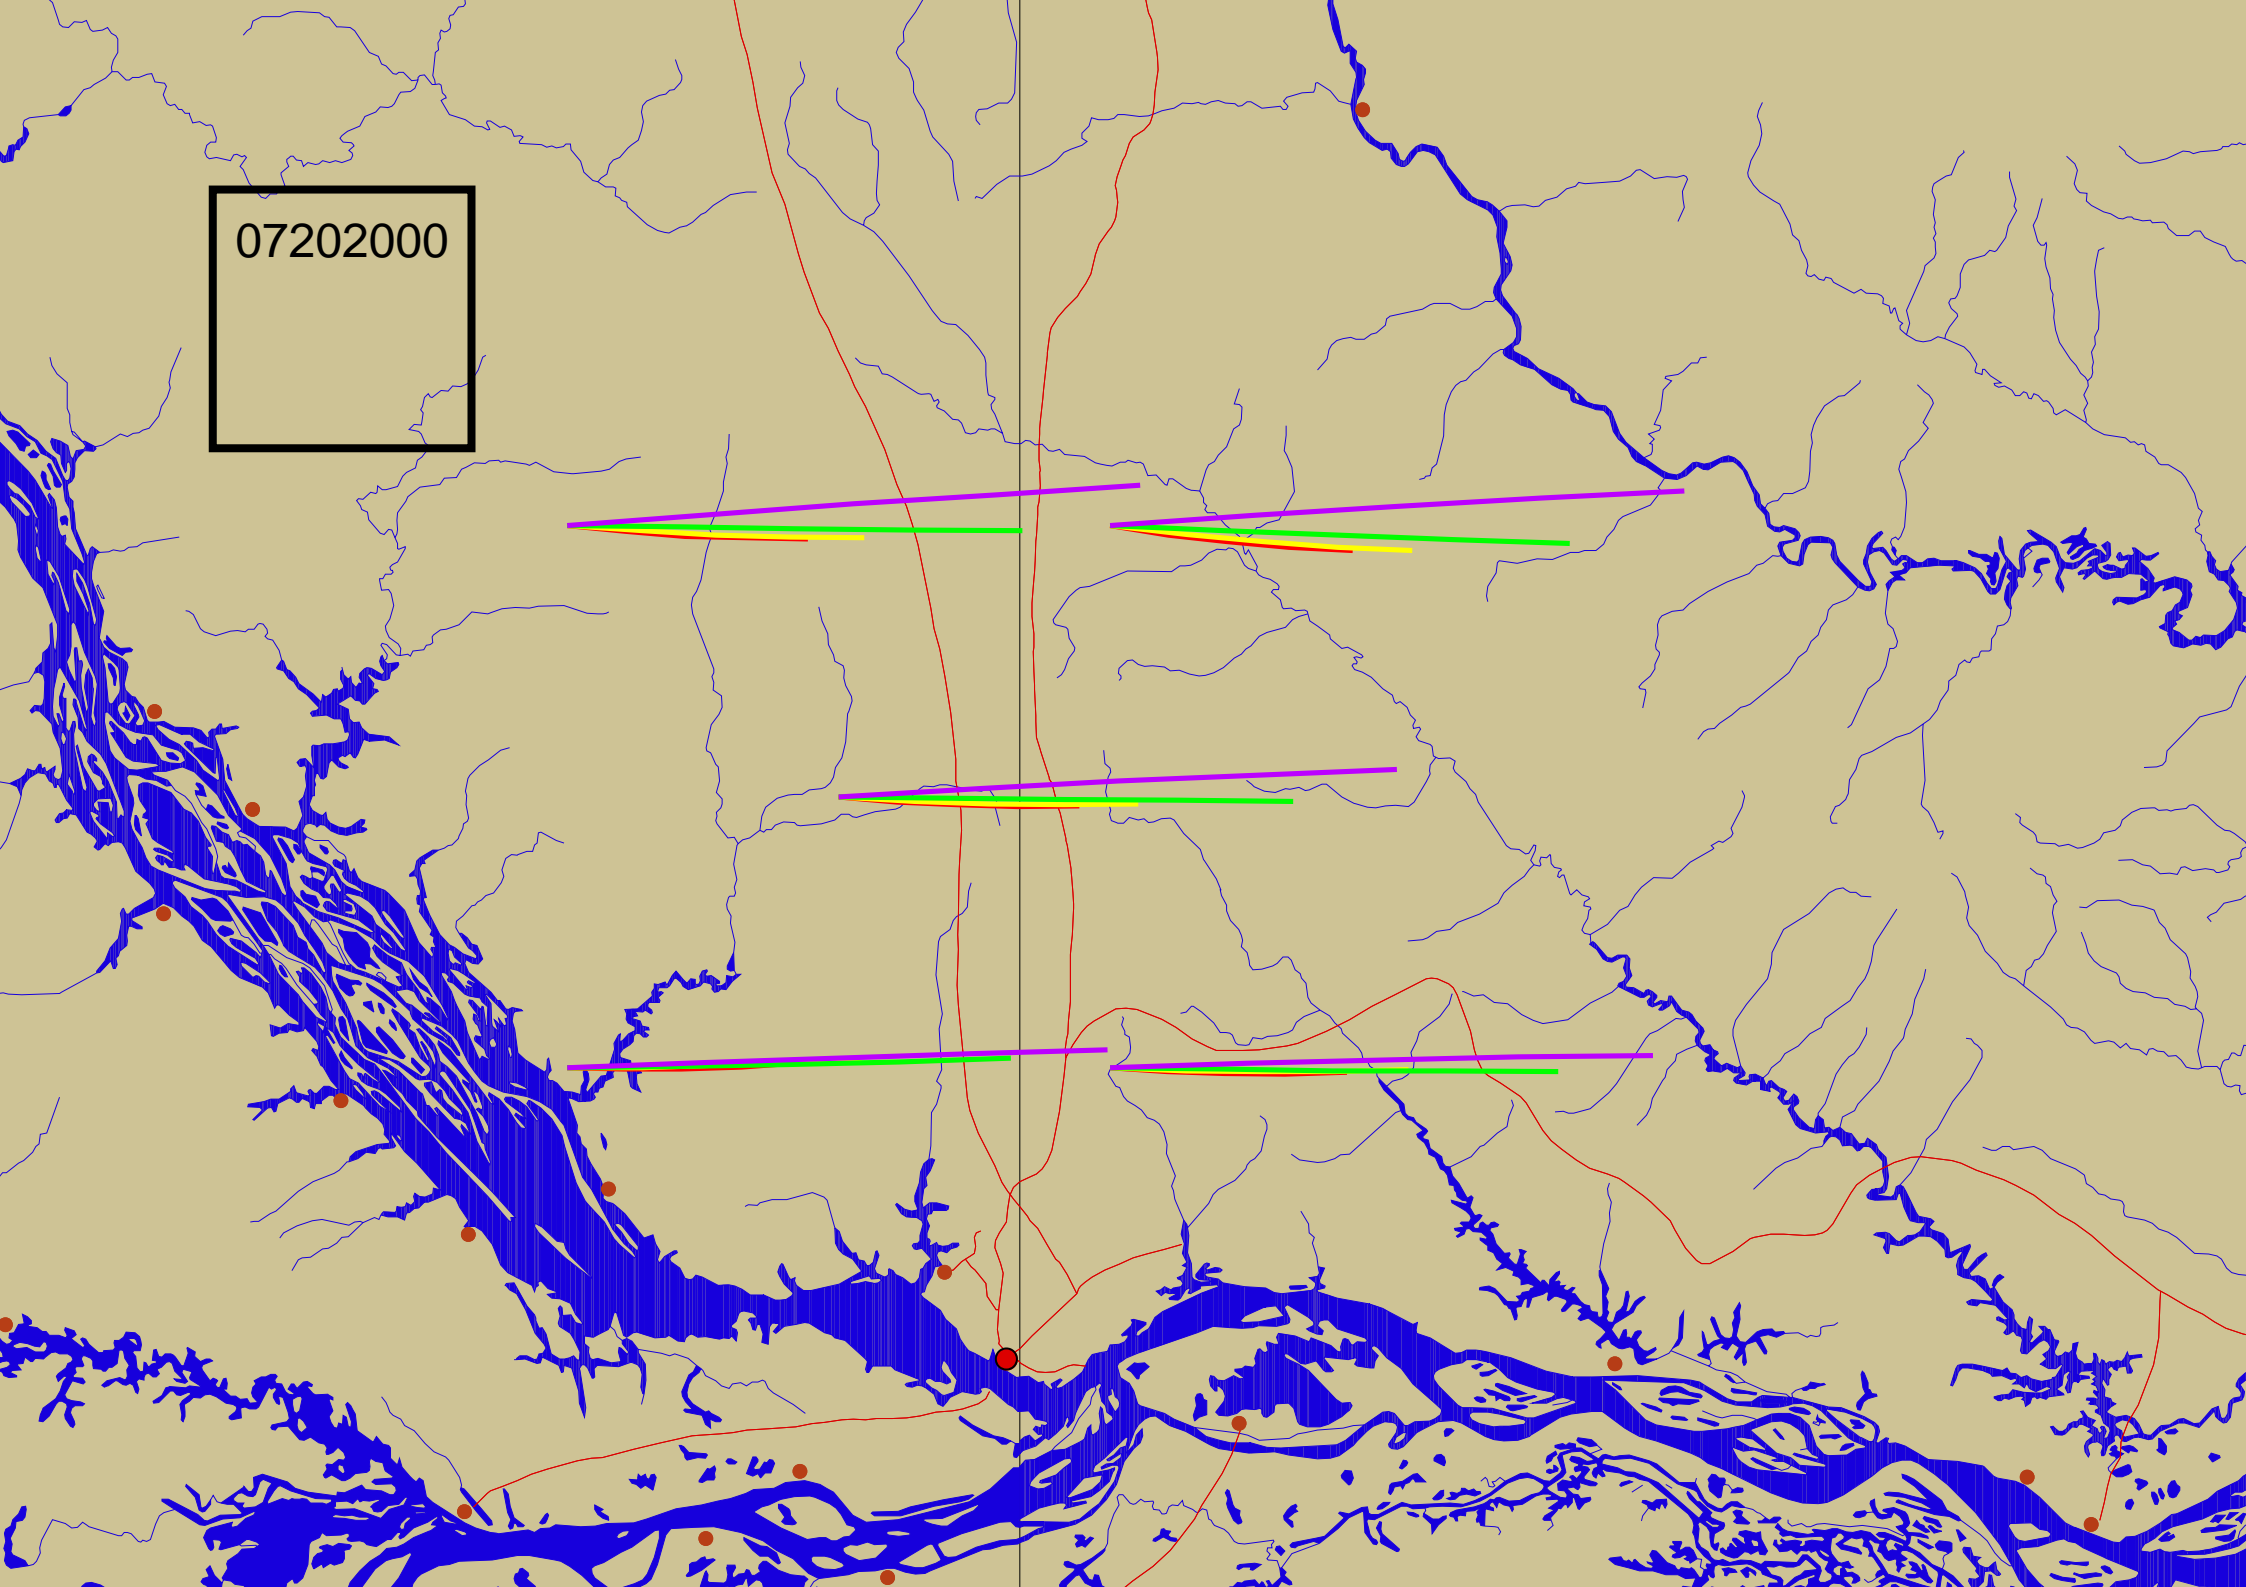

Supplement: Supplementary file 1 [file bg-4-759-2007-supplement.pdf]
